# Supplementary material for: Proteome of fraction from Tityus serrulatus venom reveals new enzymes and toxins
Source: PubMed Central journal article supplement (PMC6483408; doi:10.1590/1678-9199-jvatitd-1482-18), 2019-04-18
Supplement: 1678-9199-jvatitd-25-e148218-s1.pdf [file 1678-9199-jvatitd-25-e148218-s1.pdf]

## Supplementary Material to “Proteome of fraction from *Tityus serrulatus* venom reveals new enzymes and toxins”

**Additional file 1** - Full list of proteins and peptides identified after proteomics analysis of Fraction I from *T. serrulatus* venom against the database. Only peptides with  $-10\lg P > 20$  were used to match the proteins in this study.

### Protein List

| Protein Group | Protein ID | Accession | -10lgP | Coverage (%) | Coverage (%) Sample 1 | Intensity Sample 1 | #Peptides | #Unique | #Spec Sample 1 | PTM                                                                                                                                                 | Avg. Mass | Description                                                                                                                                                |
|---------------|------------|-----------|--------|--------------|-----------------------|--------------------|-----------|---------|----------------|-----------------------------------------------------------------------------------------------------------------------------------------------------|-----------|------------------------------------------------------------------------------------------------------------------------------------------------------------|
| 3             | 60         | P84190.1  | 214,15 | 100          | 100                   | 1,28E+09           | 48        | 12      | 2252           | Amidation; Carbamylation; Methylation(KR); Ubiquitin; Sodium adduct; 29 more                                                                        | 2726      | RecName: Full=Hypotensin-2; AltName: Full=Hypotensin II; Short=TsHpt-II; Contains: RecName: Full=Hypotensin-4; AltName: Full=Hypotensin IV; Short=TsHpt-IV |
| 5             | 110        | P86824.1  | 152,49 | 100          | 100                   | 3,08E+10           | 8         | 8       | 507            | Amidation; Ubiquitin; Sodium adduct; Replacement of proton by potassium; Formylation (Protein N-term); 5 more                                       | 1465      | RecName: Full=Hypotensin-like peptide                                                                                                                      |
| 4             | 29         | P86821.1  | 248,15 | 92           | 92                    | 3,17E+10           | 56        | 44      | 1710           | Sodium adduct; Carboxylation (E); Replacement of proton with ammonium ion; Replacement of proton by potassium; Formylation (Protein N-term); 8 more | 3767      | RecName: Full=Pape peptide                                                                                                                                 |
| 9             | 23         | P68411.1  | 228,29 | 92           | 92                    | 2,23E+10           | 16        | 12      | 343            | Carbamidomethylation; Oxidation (M); Carbamylation; Methylation(KR); Ubiquitin; 5 more                                                              | 6998      | RecName: Full=Toxin Tst2; AltName: Full=P-Mice-beta* NaTx5.2; AltName: Full=Tityustoxin II; Short=TsTX-II; AltName: Full=Toxin III-8                       |

| Protein Group | Protein ID | Accession  | -10lgP | Coverage (%) | Coverage (%) Sample 1 | Intensity Sample 1 | #Peptides | #Unique | #Spec Sample 1 | PTM                                                                                                                                                                               | Avg. Mass | Description                                                                                                                                                                                                                    |
|---------------|------------|------------|--------|--------------|-----------------------|--------------------|-----------|---------|----------------|-----------------------------------------------------------------------------------------------------------------------------------------------------------------------------------|-----------|--------------------------------------------------------------------------------------------------------------------------------------------------------------------------------------------------------------------------------|
| 9             | 24         | 1913435A   | 228,29 | 92           | 92                    | 2,23E+10           | 16        | 12      | 343            | Carbamidomethylation; Oxidation (M); Carbamylation; Methylation(KR); Ubiquitin; 5 more                                                                                            | 6998      | beta toxin TsII                                                                                                                                                                                                                |
| 9             | 25         | P68410.1   | 228,29 | 92           | 92                    | 2,23E+10           | 16        | 12      | 343            | Carbamidomethylation; Oxidation (M); Carbamylation; Methylation(KR); Ubiquitin; 5 more                                                                                            | 6998      | RecName: Full=Alpha-mammal toxin Ts2; AltName: Full=P-Mice-beta* NaTx5.1; AltName: Full=Tityustoxin II; Short=Toxin II; Short=TsTX-II; Short=Tst2; AltName: Full=Toxin T1-IV; AltName: Full=TsTX III-8; AltName: Full=TsTX-III |
| 9             | 26         | AAB36322.1 | 228,29 | 92           | 92                    | 2,23E+10           | 16        | 12      | 343            | Carbamidomethylation; Oxidation (M); Carbamylation; Methylation(KR); Ubiquitin; 5 more                                                                                            | 6998      | III-8st=toxin III-8 homolog [Tityus stigmurus venom Peptide 62 aa]                                                                                                                                                             |
| 14            | 86         | P60276.1   | 111,36 | 92           | 92                    | 0,00E+00           | 8         | 4       | 182            | Carbamidomethylation; Oxidation (M); Amidation; Carbamylation; Methylation(KR); 6 more                                                                                            | 6963      | RecName: Full=Toxin Tb2-II; AltName: Full=P-Mice-Ins-beta* NaTx5.4                                                                                                                                                             |
| 7             | 35         | POC8W6.1   | 135,33 | 91           | 91                    | 2,28E+07           | 33        | 21      | 805            | Methylation(KR); Sodium adduct; Dihydroxy; Alpha-amino adipic acid; Carboxylation (E); 15 more                                                                                    | 4555      | RecName: Full=Pape peptide                                                                                                                                                                                                     |
| 19            | 37         | Q0GY42.1   | 161,12 | 79           | 79                    | 0,00E+00           | 14        | 4       | 111            | Carbamidomethylation; Ubiquitin; Nucleophilic addition to cytopiloyne+H2O; Naphthalene-2 3-dicarboxaldehyde                                                                       | 5284      | RecName: Full=Potassium channel toxin TcoKIK                                                                                                                                                                                   |
| 19            | 38         | ABE98265.1 | 161,12 | 79           | 79                    | 0,00E+00           | 14        | 4       | 111            | Carbamidomethylation; Ubiquitin; Nucleophilic addition to cytopiloyne+H2O; Naphthalene-2 3-dicarboxaldehyde                                                                       | 5284      | KIK partial [Tityus costatus]                                                                                                                                                                                                  |
| 34            | 47         | 1NPI       | 151,26 | 77           | 77                    | 3,49E+06           | 9         | 6       | 14             | Carbamidomethylation; Alpha-amino adipic acid; 2 3-dihydro-2 2-dimethyl-7-benzofuranol N-methyl carbamate; Aminoethylcysteine; O-Diisopropylphosphorylation; LeudimethylArgGlyGly | 6891      | Chain A Toxin Vii                                                                                                                                                                                                              |
| 34            | 48         | 1B7D       | 151,26 | 77           | 77                    | 3,49E+06           | 9         | 6       | 14             | Carbamidomethylation; Alpha-amino adipic acid; 2 3-dihydro-2 2-dimethyl-7-benzofuranol N-methyl carbamate; Aminoethylcysteine; O-                                                 | 6891      | Chain A Neurotoxin (Ts1) From Brazilian Scorpion Tityus Serrulatus                                                                                                                                                             |

| Protein Group | Protein ID | Accession  | -10lgP | Coverage (%) | Coverage (%) Sample 1 | Intensity Sample 1 | #Peptides | #Unique | #Spec Sample 1 | PTM                                                                                                                                                                               | Avg. Mass | Description                                                                                                                                                                                                                                |
|---------------|------------|------------|--------|--------------|-----------------------|--------------------|-----------|---------|----------------|-----------------------------------------------------------------------------------------------------------------------------------------------------------------------------------|-----------|--------------------------------------------------------------------------------------------------------------------------------------------------------------------------------------------------------------------------------------------|
|               |            |            |        |              |                       |                    |           |         |                | Diisopropylphosphorylation; LeudimethylArgGlyGly                                                                                                                                  |           |                                                                                                                                                                                                                                            |
| 34            | 49         | AAB36321.1 | 151,26 | 76           | 76                    | 3,49E+06           | 9         | 6       | 14             | Carbamidomethylation; Alpha-amino adipic acid; 2 3-dihydro-2 2-dimethyl-7-benzofuranol N-methyl carbamate; Aminoethylcysteine; O-Diisopropylphosphorylation; LeudimethylArgGlyGly | 6992      | gamma-st=toxin gamma homolog [Tityus stigmurus venom Peptide 62 aa]                                                                                                                                                                        |
| 6             | 12         | AAC25688.1 | 278,68 | 74           | 74                    | 2,94E+10           | 39        | 33      | 882            | Carbamidomethylation; Amidation; Carbamylation; Methylation(KR); Ubiquitin; 23 more                                                                                               | 9176      | immunogenic venom protein TsnTxp [Tityus serrulatus]                                                                                                                                                                                       |
| 6             | 13         | O77463.1   | 278,68 | 74           | 74                    | 2,94E+10           | 39        | 33      | 882            | Carbamidomethylation; Amidation; Carbamylation; Methylation(KR); Ubiquitin; 23 more                                                                                               | 9176      | RecName: Full=Toxin Ts4; AltName: Full=Non-toxic protein TsNTxP; Short=NTxP; AltName: Full=P-Allerg-alpha* NaTx4.1; AltName: Full=PT-Immun-alpha* NaTx4.2; AltName: Full=Tityustoxin VI; Short=Ts VI; Short=TsTX-VI; Short=TsTXVI; Shor... |
| 6             | 14         | AAC25689.1 | 278,68 | 74           | 74                    | 2,94E+10           | 39        | 33      | 882            | Carbamidomethylation; Amidation; Carbamylation; Methylation(KR); Ubiquitin; 23 more                                                                                               | 9176      | immunogenic protein NTxp [Tityus serrulatus]                                                                                                                                                                                               |
| 34            | 21         | AAW72453.1 | 159,13 | 73           | 73                    | 0,00E+00           | 10        | 5       | 35             | Carbamidomethylation; Oxidation (M); Carbamylation; Methylation(KR); Ubiquitin; 5 more                                                                                            | 7254      | putative long-chain toxin partial [Tityus costatus]                                                                                                                                                                                        |
| 34            | 22         | Q5G8B8.1   | 159,13 | 73           | 73                    | 0,00E+00           | 10        | 5       | 35             | Carbamidomethylation; Oxidation (M); Carbamylation; Methylation(KR); Ubiquitin; 5 more                                                                                            | 7254      | RecName: Full=Toxin Tco-gamma; AltName: Full=T-beta* NaTx6.4; AltName: Full=Toxin gamma-like                                                                                                                                               |
| 12            | 58         | P0C2F3.1   | 198,62 | 70           | 70                    | 5,09E+09           | 10        | 7       | 232            | Carbamidomethylation; Amidation; Deamidation (NQ); Dehydration; Carboxymethyl (KW X@N-term); 2 more                                                                               | 6723      | RecName: Full=Potassium channel toxin Tst-beta-KTx; Short=TstbetaKTx                                                                                                                                                                       |
| 9             | 27         | JAW07016.1 | 230,09 | 69           | 69                    | 2,23E+10           | 17        | 12      | 339            | Carbamidomethylation; Carbamylation; Methylation(KR); Ubiquitin; 2 3-dihydro-2 2-dimethyl-7-benzofuranol N-methyl carbamate; 3 more                                               | 9349      | putative sodium channel toxin [Tityus serrulatus]                                                                                                                                                                                          |

| Protein Group | Protein ID | Accession  | -10lgP | Coverage (%) | Coverage (%) Sample 1 | Intensity Sample 1 | #Peptides | #Unique | #Spec Sample 1 | PTM                                                                                                                                                          | Avg. Mass | Description                                               |
|---------------|------------|------------|--------|--------------|-----------------------|--------------------|-----------|---------|----------------|--------------------------------------------------------------------------------------------------------------------------------------------------------------|-----------|-----------------------------------------------------------|
| 9             | 28         | JAW06979.1 | 230,09 | 69           | 69                    | 2,23E+10           | 17        | 12      | 339            | Carbamidomethylation; Carbamylation; Methylation(KR); Ubiquitin; 2 3-dihydro-2 2-dimethyl-7-benzofuranol N-methyl carbamate; 3 more                          | 9349      | putative sodium channel toxin [Tityus serrulatus]         |
| 14            | 87         | C0HJM9.1   | 115,09 | 69           | 69                    | 0,00E+00           | 9         | 4       | 178            | Carbamidomethylation; Amidation; Carbamylation; Ubiquitin; Deamidation (NQ); 4 more                                                                          | 9413      | RecName: Full=Toxin Tf2; Flags: Precursor                 |
| 14            | 88         | JAG85185.1 | 115,09 | 69           | 69                    | 0,00E+00           | 9         | 4       | 178            | Carbamidomethylation; Amidation; Carbamylation; Ubiquitin; Deamidation (NQ); 4 more                                                                          | 9314      | putative sodium channel toxin [Tityus bahiensis]          |
| 14            | 89         | CEF39517.1 | 115,09 | 69           | 69                    | 0,00E+00           | 9         | 4       | 178            | Carbamidomethylation; Amidation; Carbamylation; Ubiquitin; Deamidation (NQ); 4 more                                                                          | 9413      | Tf2 [Tityus fasciolatus]                                  |
| 27            | 93         | JAW07006.1 | 180,06 | 66           | 66                    | 7,25E+07           | 12        | 12      | 61             | Carbamidomethylation; 2 3-dihydro-2 2-dimethyl-7-benzofuranol N-methyl carbamate; Deamidation (NQ); O-Diisopropylphosphorylation; Dehydroalanine (Y); 2 more | 10485     | putative sodium channel toxin partial [Tityus serrulatus] |
| 2             | 44         | JAW06987.1 | 234,34 | 64           | 64                    | 1,23E+09           | 60        | 16      | 2460           | Amidation; Ammonia-loss (N); Carbamylation; Methylation(KR); Ubiquitin; 43 more                                                                              | 7774      | putative hypotensin [Tityus serrulatus]                   |
| 2             | 45         | JAW07038.1 | 234,34 | 61           | 61                    | 1,23E+09           | 60        | 16      | 2460           | Amidation; Ammonia-loss (N); Carbamylation; Methylation(KR); Ubiquitin; 43 more                                                                              | 8164      | putative hypotensin [Tityus serrulatus]                   |
| 2             | 46         | JAW06992.1 | 234,34 | 61           | 61                    | 1,23E+09           | 60        | 16      | 2460           | Amidation; Ammonia-loss (N); Carbamylation; Methylation(KR); Ubiquitin; 43 more                                                                              | 8164      | putative hypotensin [Tityus serrulatus]                   |
| 8             | 1          | JAW06995.1 | 256,65 | 59           | 59                    | 4,23E+09           | 27        | 22      | 465            | Carbamidomethylation; Oxidation (M); Amidation; Carbamylation; Methylation(KR); 10 more                                                                      | 44083     | putative cysteine-rich protein [Tityus serrulatus]        |
| 8             | 2          | JAW07031.1 | 256,65 | 57           | 57                    | 4,23E+09           | 27        | 22      | 465            | Carbamidomethylation; Oxidation (M); Amidation; Carbamylation; Methylation(KR); 10 more                                                                      | 44870     | putative cysteine-rich protein [Tityus serrulatus]        |
| 34            | 50         | AAB29128.1 | 151,26 | 56           | 56                    | 3,49E+06           | 9         | 6       | 14             | Carbamidomethylation; Alpha-amino adipic acid; 2 3-dihydro-2 2-dimethyl-7-benzofuranol N-methyl carbamate; Aminoethylcysteine; O-                            | 9382      | toxin gamma [Tityus serrulatus]                           |

| Protein Group | Protein ID | Accession  | -10lgP | Coverage (%) | Coverage (%) Sample 1 | Intensity Sample 1 | #Peptides | #Unique | #Spec Sample 1 | PTM                                                                                                                                                                               | Avg. Mass | Description                                                                                                                                                                                                                                |
|---------------|------------|------------|--------|--------------|-----------------------|--------------------|-----------|---------|----------------|-----------------------------------------------------------------------------------------------------------------------------------------------------------------------------------|-----------|--------------------------------------------------------------------------------------------------------------------------------------------------------------------------------------------------------------------------------------------|
|               |            |            |        |              |                       |                    |           |         |                | Diisopropylphosphorylation; LeudimethylArgGlyGly                                                                                                                                  |           |                                                                                                                                                                                                                                            |
| 34            | 51         | P56612.1   | 151,26 | 56           | 56                    | 3,49E+06           | 9         | 6       | 14             | Carbamidomethylation; Alpha-amino adipic acid; 2 3-dihydro-2 2-dimethyl-7-benzofuranol N-methyl carbamate; Aminoethylcysteine; O-Diisopropylphosphorylation; LeudimethylArgGlyGly | 9366      | RecName: Full=Toxin Tst1; AltName: Full=PT-Mice-beta* NaTx6.3; AltName: Full=Tst-gamma; Flags: Precursor                                                                                                                                   |
| 34            | 52         | AIA81145.1 | 151,26 | 56           | 56                    | 3,49E+06           | 9         | 6       | 14             | Carbamidomethylation; Alpha-amino adipic acid; 2 3-dihydro-2 2-dimethyl-7-benzofuranol N-methyl carbamate; Aminoethylcysteine; O-Diisopropylphosphorylation; LeudimethylArgGlyGly | 9438      | toxin 1 gamma-like protein [Tityus trivittatus]                                                                                                                                                                                            |
| 34            | 53         | CAA46982.1 | 151,26 | 56           | 56                    | 3,49E+06           | 9         | 6       | 14             | Carbamidomethylation; Alpha-amino adipic acid; 2 3-dihydro-2 2-dimethyl-7-benzofuranol N-methyl carbamate; Aminoethylcysteine; O-Diisopropylphosphorylation; LeudimethylArgGlyGly | 9382      | Ts VII [Tityus serrulatus]                                                                                                                                                                                                                 |
| 34            | 54         | P15226.2   | 151,26 | 56           | 56                    | 3,49E+06           | 9         | 6       | 14             | Carbamidomethylation; Alpha-amino adipic acid; 2 3-dihydro-2 2-dimethyl-7-benzofuranol N-methyl carbamate; Aminoethylcysteine; O-Diisopropylphosphorylation; LeudimethylArgGlyGly | 9382      | RecName: Full=Beta-mammal/insect toxin Ts1; AltName: Full=PT-Mice-Ins-beta NaTx6.1; AltName: Full=Tityustoxin VII; Short=Ts VII; Short=Ts7; Short=TsTX-VII; AltName: Full=Toxin II-11; AltName: Full=Toxin III-10; AltName: Full=Toxin ... |
| 34            | 55         | PODMM8.1   | 151,26 | 56           | 56                    | 3,49E+06           | 9         | 6       | 14             | Carbamidomethylation; Alpha-amino adipic acid; 2 3-dihydro-2 2-dimethyl-7-benzofuranol N-methyl carbamate; Aminoethylcysteine; O-Diisopropylphosphorylation; LeudimethylArgGlyGly | 9438      | RecName: Full=Beta-mammal Tt1g; AltName: Full=T.trivittatus toxin 1 gamma-like; Flags: Precursor                                                                                                                                           |
| 34            | 77         | AAB36318.1 | 144,5  | 56           | 56                    | 3,49E+06           | 8         | 5       | 13             | Carbamidomethylation; Alpha-amino adipic acid; 2 3-dihydro-2 2-dimethyl-7-benzofuranol N-methyl carbamate;                                                                        | 6893      | gamma-b=toxin gamma homolog [Tityus bahiensis venom Peptide 61 aa]                                                                                                                                                                         |

| Protein Group | Protein ID | Accession  | -10lgP | Coverage (%) | Coverage (%) Sample 1 | Intensity Sample 1 | #Peptides | #Unique | #Spec Sample 1 | PTM                                                                                                                                      | Avg. Mass | Description                                                                                                                                                                                                                                |
|---------------|------------|------------|--------|--------------|-----------------------|--------------------|-----------|---------|----------------|------------------------------------------------------------------------------------------------------------------------------------------|-----------|--------------------------------------------------------------------------------------------------------------------------------------------------------------------------------------------------------------------------------------------|
|               |            |            |        |              |                       |                    |           |         |                | Aminoethylcysteine; O-Diisopropylphosphorylation; LeudimethylArgGlyGly                                                                   |           |                                                                                                                                                                                                                                            |
| 16            | 3          | AIJ02110.2 | 264,57 | 48           | 48                    | 7,33E+09           | 30        | 17      | 160            | Carbamidomethylation; Carbamylation; Methylation(KR); Sodium adduct; 2 3-dihydro-2 2-dimethyl-7-benzofuranol N-methyl carbamate; 10 more | 44055     | metalloserulase 2 [Tityus serrulatus]                                                                                                                                                                                                      |
| 29            | 30         | P86392.3   | 199,65 | 48           | 48                    | 2,45E+09           | 12        | 12      | 44             | Carbamidomethylation; Oxidation (M); Amidation; Carbamylation; Methylation(KR); 6 more                                                   | 25390     | RecName: Full=Venom metalloproteinase antarease TserMP_A; Short=VMPA                                                                                                                                                                       |
| 29            | 31         | V9Z9A3.1   | 199,65 | 48           | 48                    | 2,45E+09           | 12        | 12      | 44             | Carbamidomethylation; Oxidation (M); Amidation; Carbamylation; Methylation(KR); 6 more                                                   | 25445     | RecName: Full=Venom metalloproteinase antarease-like TserMP_B; Short=VMPA                                                                                                                                                                  |
| 29            | 32         | AHE40589.1 | 199,65 | 48           | 48                    | 2,45E+09           | 12        | 12      | 44             | Carbamidomethylation; Oxidation (M); Amidation; Carbamylation; Methylation(KR); 6 more                                                   | 25445     | antarease-like Zn-metalloprotease partial [Tityus serrulatus]                                                                                                                                                                              |
| 29            | 33         | AHE40588.1 | 199,65 | 48           | 48                    | 2,45E+09           | 12        | 12      | 44             | Carbamidomethylation; Oxidation (M); Amidation; Carbamylation; Methylation(KR); 6 more                                                   | 25390     | antarease-like Zn-metalloprotease partial [Tityus serrulatus]                                                                                                                                                                              |
| 12            | 59         | P69940.2   | 198,62 | 48           | 48                    | 5,09E+09           | 10        | 7       | 232            | Carbamidomethylation; Amidation; Deamidation (NQ); Dehydration; Carboxymethyl (KW X@N-term); 2 more                                      | 9728      | RecName: Full=Potassium channel toxin TsTXK-beta; AltName: Full=Potassium channel toxin beta-KTx 1; AltName: Full=Tityustoxin K-beta; Short=TsTX K beta; Short=TsTX-K beta; Short=TsTXKbeta; AltName: Full=Ts8; AltName: Full=TsK2; Fla... |
| 15            | 68         | Q5G8A6.1   | 107,03 | 48           | 48                    | 0,00E+00           | 7         | 4       | 161            | Carbamidomethylation; Carboxylation (DKW); Dehydration; Oxidation to nitro                                                               | 9776      | RecName: Full=Scorpine-like peptide Tco 41.46-2; Contains: RecName: Full=Scorpine-like peptide Tco 42.14; AltName: Full=Tco-beta-KTx; Short=TcobetaKTx; Flags: Precursor                                                                   |
| 15            | 69         | JAG85216.1 | 107,03 | 48           | 48                    | 0,00E+00           | 7         | 4       | 161            | Carbamidomethylation; Carboxylation (DKW); Dehydration; Oxidation to nitro                                                               | 9776      | putative potassium channel toxin [Tityus bahiensis]                                                                                                                                                                                        |

| Protein Group | Protein ID | Accession  | -10lgP | Coverage (%) | Coverage (%) Sample 1 | Intensity Sample 1 | #Peptides | #Unique | #Spec Sample 1 | PTM                                                                                                                                                                               | Avg. Mass | Description                                                                                                                                                                                                                                |
|---------------|------------|------------|--------|--------------|-----------------------|--------------------|-----------|---------|----------------|-----------------------------------------------------------------------------------------------------------------------------------------------------------------------------------|-----------|--------------------------------------------------------------------------------------------------------------------------------------------------------------------------------------------------------------------------------------------|
| 15            | 70         | AAW72464.1 | 107,03 | 48           | 48                    | 0,00E+00           | 7         | 4       | 161            | Carbamidomethylation; Carboxylation (DKW); Dehydration; Oxidation to nitro                                                                                                        | 9760      | scorpine-like peptide precursor [Tityus costatus]                                                                                                                                                                                          |
| 15            | 71         | AAW72465.1 | 107,03 | 48           | 48                    | 0,00E+00           | 7         | 4       | 161            | Carbamidomethylation; Carboxylation (DKW); Dehydration; Oxidation to nitro                                                                                                        | 9776      | scorpine-like peptide precursor [Tityus costatus]                                                                                                                                                                                          |
| 20            | 8          | JAG85213.1 | 215,37 | 46           | 46                    | 0,00E+00           | 20        | 7       | 111            | Carbamidomethylation; Carbamylation; Methylation(KR); Sodium adduct; Phosphorylation (STY); 12 more                                                                               | 43397     | putative metalloproteinase partial [Tityus bahiensis]                                                                                                                                                                                      |
| 4             | 16         | JAW07022.1 | 266,69 | 44           | 44                    | 3,17E+10           | 88        | 76      | 1837           | Amidation; Methylation(KR); Sodium adduct; Dihydroxy; Carboxylation (E); 33 more                                                                                                  | 9838      | putative antimicrobial peptide [Tityus serrulatus]                                                                                                                                                                                         |
| 34            | 78         | JAG85210.1 | 144,5  | 44           | 44                    | 3,49E+06           | 8         | 5       | 13             | Carbamidomethylation; Alpha-amino adipic acid; 2 3-dihydro-2 2-dimethyl-7-benzofuranol N-methyl carbamate; Aminoethylcysteine; O-Diisopropylphosphorylation; LeudimethylArgGlyGly | 8711      | putative sodium channel toxin partial [Tityus bahiensis]                                                                                                                                                                                   |
| 11            | 40         | P86822.2   | 207,83 | 41           | 41                    | 5,00E+09           | 17        | 7       | 247            | Carbamidomethylation; 2 3-dihydro-2 2-dimethyl-7-benzofuranol N-methyl carbamate; Deamidation (NQ); Nucleophilic addition to cytopiloyne+H2O; Ornithine from Arginine; 3 more     | 10083     | RecName: Full=Ts19; AltName: Full=Potassium channel toxin beta-Ktx 2; Contains: RecName: Full=Ts19 fragment I; AltName: Full=Potassium channel toxin beta-Ktx 2-1; Contains: RecName: Full=Ts19 fragment II; Short=Ts19 Frag-II; AltNam... |
| 24            | 4          | JAW07025.1 | 187,7  | 41           | 41                    | 1,97E+09           | 13        | 12      | 77             | Carbamidomethylation; Ubiquitin; 2 3-dihydro-2 2-dimethyl-7-benzofuranol N-methyl carbamate; Mutation                                                                             | 37728     | putative metalloproteinase [Tityus serrulatus]                                                                                                                                                                                             |
| 19            | 39         | JAG85223.1 | 161,12 | 41           | 41                    | 0,00E+00           | 14        | 4       | 111            | Carbamidomethylation; Ubiquitin; Nucleophilic addition to cytopiloyne+H2O; Naphthalene-2 3-dicarboxaldehyde                                                                       | 10068     | putative potassium channel toxin [Tityus bahiensis]                                                                                                                                                                                        |
| 34            | 79         | P56611.1   | 144,5  | 40           | 40                    | 3,49E+06           | 8         | 5       | 13             | Carbamidomethylation; Alpha-amino adipic acid; 2 3-dihydro-2 2-dimethyl-7-benzofuranol N-methyl carbamate; Aminoethylcysteine; O-                                                 | 9384      | RecName: Full=Toxin Tb1; AltName: Full=PT-Mice-beta* NaTx6.2; AltName: Full=Tb-gamma; Flags: Precursor                                                                                                                                     |

| Protein Group | Protein ID | Accession  | -10lgP | Coverage (%) | Coverage (%) Sample 1 | Intensity Sample 1 | #Peptides | #Unique | #Spec Sample 1 | PTM                                                                                                                                                                               | Avg. Mass | Description                                                                                                      |
|---------------|------------|------------|--------|--------------|-----------------------|--------------------|-----------|---------|----------------|-----------------------------------------------------------------------------------------------------------------------------------------------------------------------------------|-----------|------------------------------------------------------------------------------------------------------------------|
|               |            |            |        |              |                       |                    |           |         |                | Diisopropylphosphorylation; LeudimethylArgGlyGly                                                                                                                                  |           |                                                                                                                  |
| 34            | 80         | JAG85191.1 | 144,5  | 40           | 40                    | 3,49E+06           | 8         | 5       | 13             | Carbamidomethylation; Alpha-amino adipic acid; 2 3-dihydro-2 2-dimethyl-7-benzofuranol N-methyl carbamate; Aminoethylcysteine; O-Diisopropylphosphorylation; LeudimethylArgGlyGly | 9384      | putative sodium channel toxin [Tityus bahiensis]                                                                 |
| 21            | 65         | ABV64385.1 | 109,8  | 38           | 38                    | 0,00E+00           | 6         | 2       | 90             | Carbamidomethylation; Carbamylation; Deamidation (NQ)                                                                                                                             | 10067     | long-chain beta-KTx-like toxin [Tityus trivittatus]                                                              |
| 21            | 66         | ABE98262.1 | 109,8  | 38           | 38                    | 0,00E+00           | 6         | 2       | 90             | Carbamidomethylation; Carbamylation; Deamidation (NQ)                                                                                                                             | 10067     | KIK [Tityus trivittatus]                                                                                         |
| 21            | 67         | Q0GY45.1   | 109,8  | 38           | 38                    | 0,00E+00           | 6         | 2       | 90             | Carbamidomethylation; Carbamylation; Deamidation (NQ)                                                                                                                             | 10067     | RecName: Full=Potassium channel toxin TtrKIK; Flags: Precursor                                                   |
| 24            | 9          | JAW06984.1 | 178,71 | 37           | 37                    | 1,83E+09           | 13        | 12      | 56             | Carbamidomethylation; Ubiquitin; 2 3-dihydro-2 2-dimethyl-7-benzofuranol N-methyl carbamate; Mutation                                                                             | 42121     | putative metalloproteinase partial [Tityus serrulatus]                                                           |
| 5             | 72         | JAW07002.1 | 205,3  | 36           | 36                    | 3,14E+10           | 24        | 20      | 881            | Amidation; Ubiquitin; Sodium adduct; Phosphorylation (STY); Dihydroxy; 10 more                                                                                                    | 8033      | putative hypotensin [Tityus serrulatus]                                                                          |
| 24            | 5          | AMO02558.1 | 187,7  | 35           | 35                    | 1,97E+09           | 13        | 12      | 77             | Carbamidomethylation; Ubiquitin; 2 3-dihydro-2 2-dimethyl-7-benzofuranol N-methyl carbamate; Mutation                                                                             | 44932     | metalloserulase 16 [Tityus serrulatus]                                                                           |
| 25            | 11         | JAW07039.1 | 171,75 | 35           | 35                    | 0,00E+00           | 13        | 2       | 72             | Carbamidomethylation; Phosphorylation (STY); Dihydroxy; Deamidation (NQ); Acetylation (TSCYH); 2 more                                                                             | 44723     | putative metalloproteinase [Tityus serrulatus]                                                                   |
| 17            | 19         | JAG85161.1 | 161,66 | 35           | 35                    | 0,00E+00           | 12        | 7       | 117            | Carbamidomethylation; Oxidation (M); 2 3-dihydro-2 2-dimethyl-7-benzofuranol N-methyl carbamate; Deamidation (NQ); Dimethylation(KR); 4 more                                      | 44944     | putative venom cysteine-rich protein [Tityus bahiensis]                                                          |
| 11            | 62         | POC8W4.2   | 206,18 | 34           | 34                    | 5,00E+09           | 16        | 7       | 230            | Carbamidomethylation; 2 3-dihydro-2 2-dimethyl-7-benzofuranol N-methyl carbamate; Deamidation (NQ); Nucleophilic addition to cytopiloyne+H2O; Ornithine from Arginine; 3 more     | 10097     | RecName: Full=Potassium channel toxin TstKMK; AltName: Full=Toxin 5536; AltName: Full=beta-Ktx; Flags: Precursor |



| Protein Group | Protein ID | Accession      | -10lgP | Coverage (%) | Coverage (%) Sample 1 | Intensity Sample 1 | #Peptides | #Unique | #Spec Sample 1 | PTM                                                                                                                                                                           | Avg. Mass | Description                                                                                                                               |
|---------------|------------|----------------|--------|--------------|-----------------------|--------------------|-----------|---------|----------------|-------------------------------------------------------------------------------------------------------------------------------------------------------------------------------|-----------|-------------------------------------------------------------------------------------------------------------------------------------------|
| 11            | 63         | AFP87551.1     | 206,18 | 34           | 34                    | 5,00E+09           | 16        | 7       | 230            | Carbamidomethylation; 2 3-dihydro-2 2-dimethyl-7-benzofuranol N-methyl carbamate; Deamidation (NQ); Nucleophilic addition to cytopiloyne+H2O; Ornithine from Arginine; 3 more | 10097     | potassium channel blocker-like toxin beta-KTx [Tityus stigmurus]                                                                          |
| 42            | 42         | JAW06978.1     | 134,71 | 34           | 34                    | 0,00E+00           | 5         | 5       | 8              | Carbamidomethylation; 2 3-dihydro-2 2-dimethyl-7-benzofuranol N-methyl carbamate; Aminoethylcysteine; Mutation                                                                | 19350     | putative phospholipase A2 partial [Tityus serrulatus]                                                                                     |
| 36            | 108        | JAW06986.1     | 112,74 | 34           | 34                    | 0,00E+00           | 5         | 5       | 7              | Carbamidomethylation; Phenethyl isothiocyanate; Mutation                                                                                                                      | 22348     | putative cysteine-rich protein partial [Tityus serrulatus]                                                                                |
| 29            | 18         | AIJ02109.2     | 201,95 | 33           | 33                    | 2,45E+09           | 13        | 13      | 45             | Carbamidomethylation; Oxidation (M); Amidation; Carbamylation; Methylation(KR); 6 more                                                                                        | 42961     | metalloserulase 1 [Tityus serrulatus]                                                                                                     |
| 35            | 130        | AAW72463.1     | 57,45  | 33           | 33                    | 4,00E+09           | 3         | 2       | 13             | Carbamidomethylation; Mutation                                                                                                                                                | 9036      | putative long-chain toxin precursor [Tityus costatus]                                                                                     |
| 35            | 131        | Q5G8A8.1       | 57,45  | 33           | 33                    | 4,00E+09           | 3         | 2       | 13             | Carbamidomethylation; Mutation                                                                                                                                                | 9036      | RecName: Full=Toxin-like TcoNTxP1; AltName: Full=Insect-like toxic peptide Tco 38.32-2; AltName: Full=PT-alpha* NaTx4.5; Flags: Precursor |
| 26            | 10         | JAG85190.1     | 155,55 | 32           | 32                    | 0,00E+00           | 11        | 2       | 74             | Carbamidomethylation; Oxidation (M); Phosphorylation (STY); 2 3-dihydro-2 2-dimethyl-7-benzofuranol N-methyl carbamate; Deamidation (NQ); 2 more                              | 44081     | putative metalloproteinase partial [Tityus bahiensis]                                                                                     |
| 23            | 97         | Q0GY43.1       | 98,84  | 32           | 32                    | 0,00E+00           | 6         | 3       | 83             | Carbamidomethylation; Monoglutamyl; Glycidamide adduct                                                                                                                        | 9960      | RecName: Full=Potassium channel toxin TdiKIK; Short=TdKIK; Flags: Precursor                                                               |
| 23            | 98         | ABE98264.1     | 98,84  | 32           | 32                    | 0,00E+00           | 6         | 3       | 83             | Carbamidomethylation; Monoglutamyl; Glycidamide adduct                                                                                                                        | 9960      | KIK [Tityus discrepans]                                                                                                                   |
| 32            | 107        | XP_023239442.1 | 156,01 | 30           | 30                    | 1,84E+08           | 11        | 11      | 40             | Carbamidomethylation; Carbamylation; 2 3-dihydro-2 2-dimethyl-7-benzofuranol N-methyl carbamate; Mutation                                                                     | 39135     | peptidylglycine alpha-hydroxylating monooxygenase-like [Centruroides sculpturatus]                                                        |
| 42            | 43         | JAW07019.1     | 134,71 | 28           | 28                    | 0,00E+00           | 5         | 5       | 8              | Carbamidomethylation; 2 3-dihydro-2 2-dimethyl-7-benzofuranol N-methyl                                                                                                        | 23693     | putative phospholipase A2 [Tityus serrulatus]                                                                                             |

| Protein Group | Protein ID | Accession      | -10lgP | Coverage (%) | Coverage (%) Sample 1 | Intensity Sample 1 | #Peptides | #Unique | #Spec Sample 1 | PTM                                                                                                                                                                              | Avg. Mass | Description                                                                                       |
|---------------|------------|----------------|--------|--------------|-----------------------|--------------------|-----------|---------|----------------|----------------------------------------------------------------------------------------------------------------------------------------------------------------------------------|-----------|---------------------------------------------------------------------------------------------------|
|               |            |                |        |              |                       |                    |           |         |                | carbamate; Aminoethylcysteine; Mutation                                                                                                                                          |           |                                                                                                   |
| 54            | 109        | XP_023218922.1 | 79,29  | 28           | 28                    | 0,00E+00           | 2         | 2       | 2              | Carbamidomethylation; Sodium adduct                                                                                                                                              | 16085     | lysozyme-like [Centruroides sculpturatus]                                                         |
| 31            | 15         | AIJ02113.2     | 186,3  | 26           | 26                    | 7,89E+08           | 11        | 11      | 39             | Carbamidomethylation; 2 3-dihydro-2 2-dimethyl-7-benzofuranol N-methyl carbamate; Mutation                                                                                       | 45218     | metalloserulase 5 [Tityus serrulatus]                                                             |
| 43            | 95         | JAG85215.1     | 65,19  | 25           | 25                    | 9,36E+08           | 6         | 6       | 15             | Amidation                                                                                                                                                                        | 10712     | putative BPP-like protein [Tityus bahiensis]                                                      |
| 18            | 20         | AIJ02112.2     | 197,51 | 21           | 21                    | 6,90E+08           | 10        | 10      | 109            | Carbamidomethylation; Carbamylation; Methylation(KR); Sodium adduct; 2 3-dihydro-2 2-dimethyl-7-benzofuranol N-methyl carbamate; 4 more                                          | 44149     | metalloserulase 4 [Tityus serrulatus]                                                             |
| 39            | 101        | AIJ02111.3     | 107,26 | 21           | 21                    | 0,00E+00           | 5         | 5       | 11             | Carbamidomethylation; Sodium adduct; 2 3-dihydro-2 2-dimethyl-7-benzofuranol N-methyl carbamate; Dimethylation of proline residue; N-Succinimidyl-2-morpholine acetate; Mutation | 43693     | metalloserulase 3 partial [Tityus serrulatus]                                                     |
| 22            | 61         | JAW07042.1     | 103,02 | 18           | 18                    | 0,00E+00           | 6         | 2       | 51             | Phosphorylation (STY); Deamidation (NQ); Heme                                                                                                                                    | 45537     | putative metalloproteinase partial [Tityus serrulatus]                                            |
| 30            | 85         | XP_023242894.1 | 160,97 | 18           | 18                    | 0,00E+00           | 11        | 11      | 45             | Ethylation; EDT; Dimethylation of proline residue; Mutation                                                                                                                      | 45939     | ectonucleotide pyrophosphatase/phosphodiesterase family member 5-like [Centruroides sculpturatus] |
| 36            | 81         | JAW07036.1     | 130,66 | 16           | 16                    | 0,00E+00           | 7         | 7       | 12             | Carbamidomethylation; Sodium adduct; Phenethyl isothiocyanate; Mutation                                                                                                          | 53185     | cysteine-rich perotein [Tityus serrulatus]                                                        |
| 44            | 82         | JAW06991.1     | 134,2  | 15           | 15                    | 1,83E+08           | 6         | 6       | 6              | Carbamidomethylation; Deamidation (NQ); Mutation                                                                                                                                 | 47350     | putative cysteine-rich protein [Tityus serrulatus]                                                |
| 44            | 84         | JAW07032.1     | 134,2  | 15           | 15                    | 1,83E+08           | 6         | 6       | 6              | Carbamidomethylation; Deamidation (NQ); Mutation                                                                                                                                 | 47350     | putative cysteine-rich protein [Tityus serrulatus]                                                |
| 29            | 75         | AHE40596.1     | 81,57  | 13           | 13                    | 0,00E+00           | 3         | 3       | 12             | Carbamidomethylation; Mutation                                                                                                                                                   | 43062     | antarease-like Zn-metalloprotease [Tityus trivittatus]                                            |
| 29            | 76         | V9ZAY0.1       | 81,57  | 13           | 13                    | 0,00E+00           | 3         | 3       | 12             | Carbamidomethylation; Mutation                                                                                                                                                   | 43062     | RecName: Full=Venom metalloproteinase antarease-like TtrivMP_A; Short=VMPA; Flags: Precursor      |

| Protein Group | Protein ID | Accession      | -10lgP | Coverage (%) | Coverage (%) Sample 1 | Intensity Sample 1 | #Peptides | #Unique | #Spec Sample 1 | PTM                                                            | Avg. Mass | Description                                                                                       |
|---------------|------------|----------------|--------|--------------|-----------------------|--------------------|-----------|---------|----------------|----------------------------------------------------------------|-----------|---------------------------------------------------------------------------------------------------|
| 29            | 64         | JAG85220.1     | 82,78  | 10           | 10                    | 0,00E+00           | 3         | 3       | 12             | Carbamidomethylation                                           | 42480     | putative metalloproteinase partial [Tityus bahiensis]                                             |
| 41            | 114        | JAW07023.1     | 101,34 | 10           | 10                    | 7,38E+06           | 4         | 4       | 8              | Amidation; Carbamylation; Deamidation (NQ)                     | 32741     | putative phospholipase A2 partial [Tityus serrulatus]                                             |
| 37            | 36         | AIJ02118.2     | 163,52 | 8            | 8                     | 1,18E+09           | 9         | 9       | 11             | Replacement of proton with ammonium ion; Formylation; Mutation | 97837     | endothelin-converting enzyme 1 [Tityus serrulatus]                                                |
| 44            | 83         | JAG85159.1     | 107,97 | 7            | 7                     | 1,83E+08           | 4         | 4       | 4              | Mutation                                                       | 47590     | putative cysteine-rich venom protein [Tityus bahiensis]                                           |
| 47            | 94         | AMO02560.1     | 71,46  | 7            | 7                     | 0,00E+00           | 2         | 2       | 4              |                                                                | 43885     | metalloserulase 18 [Tityus serrulatus]                                                            |
| 48            | 116        | JAG85164.1     | 71,47  | 5            | 5                     | 0,00E+00           | 2         | 2       | 3              | O-Diisopropylphosphorylation                                   | 29546     | putative venom chymotrypsin-like proteinase partial [Tityus bahiensis]                            |
| 30            | 104        | XP_023242898.1 | 61,02  | 3            | 3                     | 0,00E+00           | 2         | 2       | 3              |                                                                | 46644     | ectonucleotide pyrophosphatase/phosphodiesterase family member 5-like [Centruroides sculpturatus] |

## Peptide List

| Peptide                                                                 | -10lgP | Mass     | Length | ppm  | m/z      | RT    | Intensity Sample 1 | Frac. | Scan  | Source File                           | #Spec | #Spec Sample 1 | Accession                                                    | PTM                                                  | AScore                                                                                                                                              |
|-------------------------------------------------------------------------|--------|----------|--------|------|----------|-------|--------------------|-------|-------|---------------------------------------|-------|----------------|--------------------------------------------------------------|------------------------------------------------------|-----------------------------------------------------------------------------------------------------------------------------------------------------|
| TQFGC(+57.02)PAYEGYC(+57.02)NDHC(+57.02)NDIER                           | 93,89  | 2605,006 | 21     | -1,1 | 869,3416 | 20,53 | 3,02E+09           | 1     | 6861  | 150211-Fr_I_Helo-red-alk-tryp-001.raw | 26    | 26             | POC2F3.1:P69940.2                                            | Carbamidomethylation                                 | C5:Carbamidomethylation:1000.00;C12:Carbamidomethylation:1000.00;C16:Carbamidomethylation:1000.00                                                   |
| FSC(+57.02)FIRPAGFC(+57.02)DGYC(+57.02)K                                | 89,91  | 1983,843 | 16     | -0,7 | 992,928  | 21,18 | 3,88E+09           | 1     | 7100  | 150211-Fr_I_Helo-red-alk-tryp-001.raw | 131   | 131            | JAW07016.1:JAW06979.1:P68411.1:1913435A:P68410.1:AA B36322.1 | Carbamidomethylation                                 | C3:Carbamidomethylation:1000.00;C11:Carbamidomethylation:1000.00;C15:Carbamidomethylation:1000.00                                                   |
| FGPNVAGETAASEVNFHFSAPHLIFPEGMK                                          | 88,77  | 3200,539 | 30     | -1   | 801,1412 | 51,2  | 1,03E+09           | 1     | 17590 | 150211-Fr_I_Helo-red-alk-tryp-001.raw | 3     | 3              | JAW07031.1:JAW06995.1                                        |                                                      |                                                                                                                                                     |
| KLGLQDDGTVAAYNTAGISLGSVC(+57.02)K                                       | 87,65  | 2652,306 | 26     | -0,5 | 885,1089 | 36    | 1,97E+09           | 1     | 12195 | 150211-Fr_I_Helo-red-alk-tryp-001.raw | 2     | 2              | AIJ02110.2:JAG85213.1                                        | Carbamidomethylation                                 | C25:Carbamidomethylation:1000.00                                                                                                                    |
| TEPSFIKDNLIPGPPAAFDVPLISAMSK                                            | 85,76  | 3069,573 | 29     | -0,4 | 1024,198 | 56,92 | 4,48E+08           | 1     | 19475 | 150211-Fr_I_Helo-red-alk-tryp-001.raw | 11    | 11             | AIJ02109.2:P86392.3:V9Z9A3.1:AHE40589.1:AHE40588.1           |                                                      |                                                                                                                                                     |
| QNEPSFIEDSAIPGHQQLDLPVDLVK                                              | 85,27  | 2874,44  | 26     | -0,1 | 959,1539 | 48,47 | 6,37E+09           | 1     | 16667 | 150211-Fr_I_Helo-red-alk-tryp-001.raw | 10    | 10             | AIJ02110.2                                                   |                                                      |                                                                                                                                                     |
| GSSGYC(+57.02)AWPAC(+57.02)YC(+57.02)YGLPDSVK                           | 83,84  | 2396,986 | 21     | 0,2  | 1199,501 | 45,12 | 1,61E+09           | 1     | 15503 | 150211-Fr_I_Helo-red-alk-tryp-001.raw | 30    | 30             | AAC25688.1:O77463.1:AAC25689.1                               | Carbamidomethylation                                 | C6:Carbamidomethylation:1000.00;C11:Carbamidomethylation:1000.00;C13:Carbamidomethylation:1000.00                                                   |
| LTSQSEYAC(+57.02)PAIDKFC(+57.02)EDHC(+57.02)AAK                         | 83,35  | 2700,162 | 23     | 0    | 676,0477 | 15,63 | 3,59E+09           | 1     | 5006  | 150211-Fr_I_Helo-red-alk-tryp-001.raw | 14    | 14             | P86822.2:POC8W4.2:AFP87551.1                                 | Carbamidomethylation                                 | C9:Carbamidomethylation:1000.00;C16:Carbamidomethylation:1000.00;C20:Carbamidomethylation:1000.00                                                   |
| K(+43.01)(+14.02)GSSGYC(+57.02)AWPAC(+57.02)YC(+57.02)YGLPDSVK          | 83,04  | 2582,103 | 22     | -1,3 | 1292,057 | 37,46 | 3,00E+09           | 1     | 12734 | 150211-Fr_I_Helo-red-alk-tryp-001.raw | 3     | 3              | AAC25688.1:O77463.1:AAC25689.1                               | Carbamylation; Methylation(KR); Carbamidomethylation | K1:Carbamylation:227.33;K1:Methylation(KR):227.33;C7:Carbamidomethylation:1000.00;C12:Carbamidomethylation:1000.00;C14:Carbamidomethylation:1000.00 |
| ASSGYC(+57.02)AWPAC(+57.02)YC(+57.02)YGVDPHIK                           | 82,33  | 2461,029 | 21     | -1,1 | 1231,52  | 36,77 | 9,39E+09           | 1     | 12481 | 150211-Fr_I_Helo-red-alk-tryp-001.raw | 19    | 19             | JAW07016.1:JAW06979.1:P68411.1:1913435A:P68410.1:AA B36322.1 | Carbamidomethylation                                 | C6:Carbamidomethylation:1000.00;C11:Carbamidomethylation:1000.00;C13:Carbamidomethylation:1000.00                                                   |
| Q(-17.03)NEPSFIEDSAIPGHQQLDLPVDLVK                                      | 81,94  | 2857,413 | 26     | -0,3 | 953,4781 | 48,89 | 6,41E+08           | 1     | 16810 | 150211-Fr_I_Helo-red-alk-tryp-001.raw | 1     | 1              | AIJ02110.2                                                   | Pyro-glu from Q                                      | Q1:Pyro-glu from Q:1000.00                                                                                                                          |
| SDVTGGFPVN(+.98)SNNC(+57.02)IYPC(+57.02)YSTQDEIQC(+57.02)EEFC(+57.02)EK | 81,01  | 3947,591 | 33     | 3,3  | 1316,875 | 44,42 | 0                  | 1     | 15256 | 150211-Fr_I_Helo-red-alk-tryp-001.raw | 3     | 3              | JAW07006.1                                                   | Deamidation (NQ); Carbamidomethylation               | N10:Deamidation (NQ):9.40;C14:Carbamidomethylation:1000.00;C18:Carbamidomethylation:1000.00;C27:C                                                   |

J Venom Anim Toxins incl Trop Dis, 2019

|                                                              |       |          |    |      |          |       |          |   |       |                                       |    |    |                                                    |                                          |                                                                                                                                 |                                                                  |
|--------------------------------------------------------------|-------|----------|----|------|----------|-------|----------|---|-------|---------------------------------------|----|----|----------------------------------------------------|------------------------------------------|---------------------------------------------------------------------------------------------------------------------------------|------------------------------------------------------------------|
|                                                              |       |          |    |      |          |       |          |   |       |                                       |    |    |                                                    |                                          |                                                                                                                                 | arbamidomethylation:1000.00<br>;C31:Carbamidomethylation:1000.00 |
| <b>KGSSGYC(+57.02)AWPAC(+57.02)YC(+57.02)YGLPDSVK</b>        | 81    | 2525,081 | 22 | 0,2  | 842,7012 | 37,59 | 8,03E+09 | 1 | 12780 | 150211-Fr_I_Helo-red-alk-tryp-001.raw | 45 | 45 | AAC25688.1:O77463.1:AAC25689.1                     | Carbamidomethylation                     | C7:Carbamidomethylation:1000.00;C12:Carbamidomethylation:1000.00;C14:Carbamidomethylation:1000.00                               |                                                                  |
| <b>ITC(+57.02)FLTAAGYC(+57.02)NTEC(+57.02)TLK</b>            | 80,52 | 2121,953 | 18 | -0,4 | 708,3248 | 39,02 | 1,02E+10 | 1 | 13304 | 150211-Fr_I_Helo-red-alk-tryp-001.raw | 37 | 37 | AAC25688.1:O77463.1:AAC25689.1                     | Carbamidomethylation                     | C3:Carbamidomethylation:1000.00;C11:Carbamidomethylation:1000.00;C15:Carbamidomethylation:1000.00                               |                                                                  |
| <b>FFLNKDEASC(+57.02)VVSAC(+57.02)JK</b>                     | 79,89 | 1873,87  | 16 | -2,3 | 937,9402 | 15,43 | 0        | 1 | 4935  | 150211-Fr_I_Helo-red-alk-tryp-001.raw | 1  | 1  | AIJ02112.2                                         | Carbamidomethylation                     | C10:Carbamidomethylation:1000.00;C15:Carbamidomethylation:1000.00                                                               |                                                                  |
| <b>T(+59.02)QFGC(+57.02)PAYEGYC(+57.02)NDHC(+57.02)NDIER</b> | 79,69 | 2664,025 | 21 | 1,4  | 889,0168 | 32,73 | 0        | 1 | 11015 | 150211-Fr_I_Helo-red-alk-tryp-001.raw | 8  | 8  | POC2F3.1:P69940.2                                  | Aminoethylcysteine; Carbamidomethylation | T1:Aminoethylcysteine:1000.00;C5:Carbamidomethylation:1000.00;C12:Carbamidomethylation:1000.00;C16:Carbamidomethylation:1000.00 |                                                                  |
| <b>KTQFGC(+57.02)PAYEGYC(+57.02)NDHC(+57.02)NDIER</b>        | 78,94 | 2733,101 | 22 | -2,2 | 912,0388 | 16,89 | 2,07E+09 | 1 | 5479  | 150211-Fr_I_Helo-red-alk-tryp-001.raw | 4  | 4  | POC2F3.1:P69940.2                                  | Carbamidomethylation                     | C6:Carbamidomethylation:1000.00;C13:Carbamidomethylation:1000.00;C17:Carbamidomethylation:1000.00                               |                                                                  |
| <b>KITC(+57.02)FLTAAGYC(+57.02)NTEC(+57.02)TLK</b>           | 78,32 | 2250,048 | 19 | -0,6 | 1126,031 | 20,01 | 1,15E+07 | 1 | 6661  | 150211-Fr_I_Helo-red-alk-tryp-001.raw | 3  | 3  | AAC25688.1:O77463.1:AAC25689.1                     | Carbamidomethylation                     | C4:Carbamidomethylation:1000.00;C12:Carbamidomethylation:1000.00;C16:Carbamidomethylation:1000.00                               |                                                                  |
| <b>KQNEPSFIEDSAIPGHQVLDVLDVK</b>                             | 78,23 | 3002,535 | 27 | -2,3 | 751,6393 | 46,34 | 0        | 1 | 15935 | 150211-Fr_I_Helo-red-alk-tryp-001.raw | 3  | 3  | AIJ02110.2                                         |                                          |                                                                                                                                 |                                                                  |
| <b>DAC(+57.02)YC(+57.02)EHLPEVVK</b>                         | 78,2  | 1606,676 | 13 | -0,5 | 804,3446 | 13,24 | 7,25E+07 | 1 | 4137  | 150211-Fr_I_Helo-red-alk-tryp-001.raw | 41 | 41 | JAW07006.1                                         | Carbamidomethylation                     | C3:Carbamidomethylation:1000.00;C5:Carbamidomethylation:1000.00                                                                 |                                                                  |
| <b>ESLIPGEEVDFDFGHVGNLNLVNC(+57.02)K</b>                     | 77,98 | 2785,375 | 25 | -0,1 | 697,3508 | 52,57 | 1,42E+08 | 1 | 18045 | 150211-Fr_I_Helo-red-alk-tryp-001.raw | 19 | 19 | AIJ02112.2                                         | Carbamidomethylation                     | C24:Carbamidomethylation:1000.00                                                                                                |                                                                  |
| <b>QNEPSFIED(+21.98)SAIPGHQVLDVLDVK</b>                      | 76,97 | 2896,422 | 26 | -2,1 | 966,4792 | 46,21 | 3,18E+08 | 1 | 15887 | 150211-Fr_I_Helo-red-alk-tryp-001.raw | 1  | 1  | AIJ02110.2                                         | Sodium adduct                            | D9:Sodium adduct:8.69                                                                                                           |                                                                  |
| <b>EPDGSVSTNTLGVANLGGAC(+57.02)NPC(+57.02)LK</b>             | 76,93 | 2530,179 | 25 | -1,3 | 844,3992 | 34,83 | 0        | 1 | 11775 | 150211-Fr_I_Helo-red-alk-tryp-001.raw | 1  | 1  | AIJ02112.2                                         | Carbamidomethylation                     | C20:Carbamidomethylation:1000.00;C23:Carbamidomethylation:1000.00                                                               |                                                                  |
| <b>ADVDFGTGIADSIKK</b>                                       | 76,51 | 1591,846 | 15 | -0,6 | 796,9297 | 36,15 | 5,88E+08 | 1 | 12249 | 150211-Fr_I_Helo-red-alk-tryp-001.raw | 4  | 4  | JAW07002.1                                         |                                          |                                                                                                                                 |                                                                  |
| <b>GSGINYLVLQVHYADVTR</b>                                    | 76,34 | 2004,043 | 18 | -0,8 | 1003,028 | 37,03 | 0        | 1 | 12577 | 150211-Fr_I_Helo-red-alk-tryp-001.raw | 1  | 1  | XP_023239442.1                                     |                                          |                                                                                                                                 |                                                                  |
| <b>VTESDKQTILETHNQLR</b>                                     | 74,6  | 2011,033 | 17 | 0    | 671,3517 | 30,09 | 5,05E+07 | 1 | 10102 | 150211-Fr_I_Helo-red-alk-tryp-001.raw | 33 | 33 | JAW07031.1:JAW06995.1                              |                                          |                                                                                                                                 |                                                                  |
| <b>DNLIPGPPAAFDPDLISAMSK</b>                                 | 74,43 | 2267,151 | 22 | 0    | 756,7241 | 55,31 | 2,40E+08 | 1 | 18942 | 150211-Fr_I_Helo-red-alk-tryp-001.raw | 2  | 2  | AIJ02109.2:P86392.3:V9Z9A3.1:AHE40589.1:AHE40588.1 |                                          |                                                                                                                                 |                                                                  |

J Venom Anim Toxins incl Trop Dis, 2019

|                                                                                |       |          |    |      |          |       |          |   |       |                                       |    |    |                                                    |                                                      |                                                                                                                                                                  |
|--------------------------------------------------------------------------------|-------|----------|----|------|----------|-------|----------|---|-------|---------------------------------------|----|----|----------------------------------------------------|------------------------------------------------------|------------------------------------------------------------------------------------------------------------------------------------------------------------------|
| <b>K(+43.01)(+14.02)LGELQDDGT VAYNTAGISLGSVC(+57.02)K</b>                      | 74,32 | 2709,328 | 26 | -0,5 | 904,1161 | 36,21 | 6,06E+08 | 1 | 12273 | 150211-Fr_I_Helo-red-alk-tryp-001.raw | 2  | 2  | AIJ02110.2:JAG85213.1                              | Carbamylation; Methylation(KR); Carbamidomethylation | K1:Carbamylation:223.91;K1: Methylation(KR):223.91;C25:Carbamidomethylation:1000.00                                                                              |
| <b>FGC(+57.02)PAYEGYC(+57.02) NDHC(+57.02)NDIER</b>                            | 74,27 | 2375,899 | 19 | -1,4 | 1188,955 | 14,47 | 0        | 1 | 4585  | 150211-Fr_I_Helo-red-alk-tryp-001.raw | 1  | 1  | POC2F3.1:P69940.2                                  | Carbamidomethylation                                 | C3:Carbamidomethylation:1000.00;C10:Carbamidomethylation:1000.00;C14:Carbamidomethylation:1000.00                                                                |
| <b>ITC(+57.02)FLTAAGYC(+57.02) NTEC(+57.02)TLKK</b>                            | 73,71 | 2250,048 | 19 | -0,7 | 751,0228 | 18,32 | 2,83E+09 | 1 | 6020  | 150211-Fr_I_Helo-red-alk-tryp-001.raw | 12 | 12 | AAC25688.1:O77463.1:AAC25689.1                     | Carbamidomethylation                                 | C3:Carbamidomethylation:1000.00;C11:Carbamidomethylation:1000.00;C15:Carbamidomethylation:1000.00                                                                |
| <b>LIGVQFAINTEPSFIK</b>                                                        | 73,5  | 1847,019 | 17 | -1,3 | 924,5157 | 46,93 | 0        | 1 | 16137 | 150211-Fr_I_Helo-red-alk-tryp-001.raw | 3  | 3  | AIJ02111.3                                         |                                                      |                                                                                                                                                                  |
| <b>WADEVLNLDDEFIR</b>                                                          | 72,64 | 1834,874 | 15 | 0    | 918,4441 | 46,86 | 0        | 1 | 16112 | 150211-Fr_I_Helo-red-alk-tryp-001.raw | 2  | 2  | JAW07036.1:JAW06986.1                              |                                                      |                                                                                                                                                                  |
| <b>VVNPMVSIFTNV DITEVTR</b>                                                    | 72,48 | 2133,114 | 19 | -1,5 | 712,0442 | 51,11 | 0        | 1 | 17561 | 150211-Fr_I_Helo-red-alk-tryp-001.raw | 2  | 2  | JAW07019.1:JAW06978.1                              |                                                      |                                                                                                                                                                  |
| <b>TGGFPVNS(+340.09)NNC(+57.02)IYPC(+57.02)YSTQDEIQC(+57.02)EEFC(+57.02)EK</b> | 72,3  | 3985,565 | 30 | -0,6 | 997,3979 | 44,4  | 0        | 1 | 15248 | 150211-Fr_I_Helo-red-alk-tryp-001.raw | 1  | 1  | JAW07006.1                                         | Phosphopantetheine; Carbamidomethylation             | S8:Phosphopantetheine:31.37; C11:Carbamidomethylation:1000.00;C15:Carbamidomethylation:1000.00;C24:Carbamidomethylation:1000.00;C28:Carbamidomethylation:1000.00 |
| <b>LNTNIGGVANYASVC(+57.02)HPC(+57.02)YK</b>                                    | 71,58 | 2237,036 | 20 | 0,7  | 746,6863 | 17,59 | 0        | 1 | 5742  | 150211-Fr_I_Helo-red-alk-tryp-001.raw | 1  | 1  | AIJ02113.2                                         | Carbamidomethylation                                 | C15:Carbamidomethylation:1000.00;C18:Carbamidomethylation:1000.00                                                                                                |
| <b>DYLLYC(+57.02)DFSDKDPK</b>                                                  | 71,45 | 1777,787 | 14 | -1,8 | 889,8991 | 34,55 | 0        | 1 | 11678 | 150211-Fr_I_Helo-red-alk-tryp-001.raw | 42 | 42 | JAW07031.1:JAW06995.1:JAG85161.1                   | Carbamidomethylation                                 | C6:Carbamidomethylation:1000.00                                                                                                                                  |
| <b>EALAPEPAPEPAPEA</b>                                                         | 71,38 | 1881,9   | 19 | -0,9 | 941,9562 | 18,56 | 8,13E+08 | 1 | 6113  | 150211-Fr_I_Helo-red-alk-tryp-001.raw | 41 | 41 | JAW07022.1:P86821.1                                |                                                      |                                                                                                                                                                  |
| <b>LATDDQC(+57.02)IVIEILSVTDKLVTK</b>                                          | 71,38 | 2473,335 | 22 | 0,7  | 825,4529 | 55,38 | 0        | 1 | 18964 | 150211-Fr_I_Helo-red-alk-tryp-001.raw | 1  | 1  | AIJ02113.2                                         | Carbamidomethylation                                 | C7:Carbamidomethylation:1000.00                                                                                                                                  |
| <b>T(+43.01)EPSFIK(+14.02)DNLIP GPPAAFDPDLISAMSK</b>                           | 70,92 | 3126,595 | 29 | -0,1 | 1043,205 | 57,08 | 7,10E+07 | 1 | 19527 | 150211-Fr_I_Helo-red-alk-tryp-001.raw | 1  | 1  | AIJ02109.2:P86392.3:V9Z9A3.1:AHE40589.1:AHE40588.1 | Carbamylation; Methylation(KR)                       | T1:Carbamylation:115.16;K7: Methylation(KR):129.58                                                                                                               |
| <b>GGPNSDGSYDHGLFQINDR</b>                                                     | 70,86 | 2047,898 | 19 | -2   | 683,6387 | 32,91 | 0        | 1 | 11080 | 150211-Fr_I_Helo-red-alk-tryp-001.raw | 1  | 1  | XP_023218922.1                                     |                                                      |                                                                                                                                                                  |
| <b>S(+114.04)SGYC(+57.02)AWPAC(+57.02)YC(+57.02)YGLPDSVK</b>                   | 70,78 | 2454,008 | 20 | -0,3 | 1228,011 | 43,32 | 2,08E+09 | 1 | 14860 | 150211-Fr_I_Helo-red-alk-tryp-001.raw | 12 | 12 | AAC25688.1:O77463.1:AAC25689.1                     | Ubiquitin; Carbamidomethylation                      | S1:Ubiquitin:11.06;C5:Carbamidomethylation:1000.00;C10:Carbamidomethylation:1000.00;C12:Carbamidomethylation:1000.00                                             |
| <b>NVLVIAPPDPSVFS DPDRDIELAK</b>                                               | 70,68 | 2606,359 | 24 | -0,6 | 869,7932 | 48,74 | 8,30E+08 | 1 | 16758 | 150211-Fr_I_Helo-red-alk-tryp-001.raw | 1  | 1  | AIJ02118.2                                         |                                                      |                                                                                                                                                                  |
| <b>ITC(+57.02)FLTAAGYC(+57.02) NTE(+21.98)C(+57.02)TLK</b>                     | 70,52 | 2143,935 | 18 | -0,3 | 1072,975 | 36,07 | 1,07E+09 | 1 | 12221 | 150211-Fr_I_Helo-red-alk-tryp-001.raw | 9  | 9  | AAC25688.1:O77463.1:AAC25689.1                     | Carbamidomethylation; Sodium adduct                  | C3:Carbamidomethylation:1000.00;C11:Carbamidomethylation:1000.00;E14:Sodium                                                                                      |

J Venom Anim Toxins incl Trop Dis, 2019

|                                                                                  |       |          |    |      |          |       |          |   |       |                                       |     |     |                                                                                                                                                 |                                                                                  |  |                                                                                                                                                                                                         |                                                                                                 |                                                   |
|----------------------------------------------------------------------------------|-------|----------|----|------|----------|-------|----------|---|-------|---------------------------------------|-----|-----|-------------------------------------------------------------------------------------------------------------------------------------------------|----------------------------------------------------------------------------------|--|---------------------------------------------------------------------------------------------------------------------------------------------------------------------------------------------------------|-------------------------------------------------------------------------------------------------|---------------------------------------------------|
|                                                                                  |       |          |    |      |          |       |          |   |       |                                       |     |     |                                                                                                                                                 |                                                                                  |  |                                                                                                                                                                                                         |                                                                                                 | adduct:55.21;C15:Carbamido<br>methylation:1000.00 |
| <b>C(+57.02)AWPAC(+57.02)YC(+57.02)YGVDPHIK</b>                                  | 69,89 | 1995,843 | 16 | 0,7  | 666,2888 | 34,06 | 0        | 1 | 11499 | 150211-Fr_I_Helo-red-alk-tryp-001.raw | 2   | 2   | JAW07016.1:JAW06979.1:P68411.1:1913435A:P68410.1:AA B36322.1                                                                                    | Carbamidomethylation                                                             |  |                                                                                                                                                                                                         | C1:Carbamidomethylation:1000.00;C6:Carbamidomethylation:1000.00;C8:Carbamidomethylation:1000.00 |                                                   |
| <b>FATDEALTQHMTLTYVK</b>                                                         | 69,74 | 1967,966 | 17 | -0,4 | 656,9958 | 34,59 | 0        | 1 | 11689 | 150211-Fr_I_Helo-red-alk-tryp-001.raw | 1   | 1   | AIJ02113.2                                                                                                                                      |                                                                                  |  |                                                                                                                                                                                                         |                                                                                                 |                                                   |
| <b>ETAVTLAHESAHLGSPHDGEGDYFSLPGSPGSK</b>                                         | 69,58 | 3563,68  | 35 | 0,3  | 713,7436 | 38,03 | 1,83E+09 | 1 | 12949 | 150211-Fr_I_Helo-red-alk-tryp-001.raw | 1   | 1   | AMO02558.1:JAW07025.1:JAW06984.1                                                                                                                |                                                                                  |  |                                                                                                                                                                                                         |                                                                                                 |                                                   |
| <b>GSSGYC(+57.02)AWPAC(+57.02)YC(+57.02)YGLPNWVK</b>                             | 69,48 | 2495,05  | 21 | -0,9 | 832,6897 | 48,83 | 0        | 1 | 16789 | 150211-Fr_I_Helo-red-alk-tryp-001.raw | 1   | 1   | AAW72453.1:Q5G8B8.1:AAB29128.1:P56612.1:AIA81145.1:CAA46982.1:P15226.2:PODMM8.1:1NPI:1B7D:AAB36321.1:AA B36318.1:P56611.1:JAG85191.1:JAG85210.1 | Carbamidomethylation                                                             |  | C6:Carbamidomethylation:1000.00;C11:Carbamidomethylation:1000.00;C13:Carbamidomethylation:1000.00                                                                                                       |                                                                                                 |                                                   |
| <b>SLFVGEDVFNMEIAK</b>                                                           | 69,45 | 1810,918 | 16 | 0,1  | 604,6465 | 50,35 | 1,38E+08 | 1 | 17307 | 150211-Fr_I_Helo-red-alk-tryp-001.raw | 20  | 20  | AMO02558.1:JAW07025.1                                                                                                                           |                                                                                  |  |                                                                                                                                                                                                         |                                                                                                 |                                                   |
| <b>AD(-18.01)VDFGTGIADSIK</b>                                                    | 69,16 | 1445,74  | 14 | -0,4 | 723,877  | 45,96 | 0        | 1 | 15800 | 150211-Fr_I_Helo-red-alk-tryp-001.raw | 2   | 2   | JAW07002.1:P86824.1                                                                                                                             | Dehydration                                                                      |  | D2:Dehydration:33.18                                                                                                                                                                                    |                                                                                                 |                                                   |
| <b>AEIDFSGIPE(+21.98)DIK</b>                                                     | 68,9  | 1567,775 | 14 | -1,2 | 784,8936 | 39,48 | 6,22E+08 | 1 | 13472 | 150211-Fr_I_Helo-red-alk-tryp-001.raw | 119 | 119 | JAW06987.1:JAW07038.1:JAW06992.1:P84190.1                                                                                                       | Sodium adduct                                                                    |  | E10:Sodium adduct:22.65                                                                                                                                                                                 |                                                                                                 |                                                   |
| <b>SSGYC(+57.02)AWPAC(+57.02)YC(+57.02)YGVDPHIK</b>                              | 68,7  | 2389,992 | 20 | -0,3 | 797,6709 | 36,57 | 1,02E+08 | 1 | 12403 | 150211-Fr_I_Helo-red-alk-tryp-001.raw | 1   | 1   | JAW07016.1:JAW06979.1:P68411.1:1913435A:P68410.1:AA B36322.1                                                                                    | Carbamidomethylation                                                             |  | C5:Carbamidomethylation:1000.00;C10:Carbamidomethylation:1000.00;C12:Carbamidomethylation:1000.00                                                                                                       |                                                                                                 |                                                   |
| <b>SDVTGGFPVNS(+58.03)NNC(+57.02)IYPC(+57.02)YSTQDEIQC(+57.02)EEFC(+57.02)EK</b> | 68,51 | 4004,636 | 33 | 4,3  | 1335,892 | 44,62 | 0        | 1 | 15326 | 150211-Fr_I_Helo-red-alk-tryp-001.raw | 1   | 1   | JAW07006.1                                                                                                                                      | 2 3-dihydro-2 2-dimethyl-7-benzofuranol N-methyl carbamate; Carbamidomethylation |  | S11:2 3-dihydro-2 2-dimethyl-7-benzofuranol N-methyl carbamate:2.53;C14:Carbamidomethylation:1000.00;C18:Carbamidomethylation:1000.00;C27:Carbamidomethylation:1000.00;C31:Carbamidomethylation:1000.00 |                                                                                                 |                                                   |
| <b>NAGNENSVIEILVINPEVVK</b>                                                      | 68,35 | 2150,158 | 20 | -0,8 | 717,7261 | 46,63 | 0        | 1 | 16035 | 150211-Fr_I_Helo-red-alk-tryp-001.raw | 2   | 2   | AIJ02118.2                                                                                                                                      |                                                                                  |  |                                                                                                                                                                                                         |                                                                                                 |                                                   |
| <b>TQ(+.98)FGC(+57.02)PAYEGYC(+57.02)NDHC(+57.02)NDIER</b>                       | 68,27 | 2605,99  | 21 | 4,4  | 1304,008 | 15,44 | 0        | 1 | 4937  | 150211-Fr_I_Helo-red-alk-tryp-001.raw | 6   | 6   | POC2F3.1:P69940.2                                                                                                                               | Deamidation (NQ); Carbamidomethylation                                           |  | Q2:Deamidation (NQ):108.57;C5:Carbamidomethylation:1000.00;C12:Carbamidomethylation:1000.00;C16:Carbamidomethylation:1000.00                                                                            |                                                                                                 |                                                   |
| <b>ADVDFGTIAD(-18.01)SIK</b>                                                     | 68,03 | 1445,74  | 14 | -0,4 | 723,877  | 37,32 | 0        | 1 | 12682 | 150211-Fr_I_Helo-red-alk-tryp-001.raw | 1   | 1   | JAW07002.1:P86824.1                                                                                                                             | Dehydration                                                                      |  | D10:Dehydration:0.00                                                                                                                                                                                    |                                                                                                 |                                                   |
| <b>A(+27.99)EIDFSGIPEDIK</b>                                                     | 67,88 | 1573,788 | 14 | -0,4 | 787,9007 | 46,97 | 1,16E+08 | 1 | 16151 | 150211-Fr_I_Helo-red-alk-tryp-001.raw | 6   | 6   | P84190.1                                                                                                                                        | Formylation (Protein N-term)                                                     |  | A1:Formylation (Protein N-term):1000.00                                                                                                                                                                 |                                                                                                 |                                                   |

J Venom Anim Toxins incl Trop Dis, 2019

|                                                                |       |          |    |      |          |       |          |   |       |                                       |     |     |                                           |                                                                                  |                                                                                                                                                                       |
|----------------------------------------------------------------|-------|----------|----|------|----------|-------|----------|---|-------|---------------------------------------|-----|-----|-------------------------------------------|----------------------------------------------------------------------------------|-----------------------------------------------------------------------------------------------------------------------------------------------------------------------|
| <b>A(+27.99)EIDFSGIPEDIK</b>                                   | 67,88 | 1573,788 | 14 | -0,4 | 787,9007 | 46,97 | 1,16E+08 | 1 | 16151 | 150211-Fr_I_Helo-red-alk-tryp-001.raw | 6   | 6   | JAW06987.1:JAW07038.1:JAW06992.1          | Formylation                                                                      | A1:Formylation:111.11                                                                                                                                                 |
| <b>AEIDFS(-18.01)GIPEDIK</b>                                   | 67,83 | 1527,782 | 14 | -0,4 | 764,8979 | 44,63 | 0        | 1 | 15330 | 150211-Fr_I_Helo-red-alk-tryp-001.raw | 18  | 18  | JAW06987.1:JAW07038.1:JAW06992.1:P84190.1 | Dehydration                                                                      | S6:Dehydration:32.28                                                                                                                                                  |
| <b>QIGIFDSKGTILVGLGVANLGR</b>                                  | 67,78 | 2326,337 | 23 | -0,9 | 776,4523 | 51,34 | 0        | 1 | 17638 | 150211-Fr_I_Helo-red-alk-tryp-001.raw | 2   | 2   | AM002558.1:JAW07025.1:JAW06984.1          |                                                                                  |                                                                                                                                                                       |
| <b>LTEADIILLFSQR</b>                                           | 67,53 | 1517,845 | 13 | -1,4 | 759,9289 | 47,19 | 0        | 1 | 16231 | 150211-Fr_I_Helo-red-alk-tryp-001.raw | 2   | 2   |                                           |                                                                                  |                                                                                                                                                                       |
| <b>LTS(+58.03)QSEYAC(+57.02)PAIDKFC(+57.02)EDHC(+57.02)AAK</b> | 67,5  | 2758,191 | 23 | -1,9 | 920,4026 | 23,17 | 0        | 1 | 7822  | 150211-Fr_I_Helo-red-alk-tryp-001.raw | 22  | 22  | P86822.2:POC8W4.2:AFP87551.1              | 2 3-dihydro-2 2-dimethyl-7-benzofuranol N-methyl carbamate; Carbamidomethylation | S3:2 3-dihydro-2 2-dimethyl-7-benzofuranol N-methyl carbamate:14.04;C9:Carbamidomethylation:1000.00;C16:Carbamidomethylation:1000.00;C20:Carbamidomethylation:1000.00 |
| <b>VGVAQDSDSYNER</b>                                           | 67,46 | 1466,627 | 13 | -0,7 | 734,3204 | 6,38  | 0        | 1 | 1664  | 150211-Fr_I_Helo-red-alk-tryp-001.raw | 32  | 32  | AIJ02110.2:JAG85213.1                     |                                                                                  |                                                                                                                                                                       |
| <b>AEID(+21.98)FSGIPEDIK</b>                                   | 67,25 | 1567,775 | 14 | 0,3  | 523,5989 | 38,32 | 4,27E+06 | 1 | 13054 | 150211-Fr_I_Helo-red-alk-tryp-001.raw | 41  | 41  | JAW06987.1:JAW07038.1:JAW06992.1:P84190.1 | Sodium adduct                                                                    | D4:Sodium adduct:48.33                                                                                                                                                |
| <b>ADVDFGTIADSIK</b>                                           | 67,24 | 1463,751 | 14 | -0,3 | 732,8824 | 42,74 | 2,72E+10 | 1 | 14653 | 150211-Fr_I_Helo-red-alk-tryp-001.raw | 288 | 288 | JAW07002.1:P86824.1                       |                                                                                  |                                                                                                                                                                       |
| <b>LTSQSEYAC(+57.02)PAIDKFC(+57.02)EDHC(+57.02)AA</b>          | 67,16 | 2572,067 | 22 | 0,3  | 858,3632 | 17,5  | 1,08E+09 | 1 | 5708  | 150211-Fr_I_Helo-red-alk-tryp-001.raw | 7   | 7   | P86822.2:POC8W4.2:AFP87551.1              | Carbamidomethylation                                                             | C9:Carbamidomethylation:1000.00;C16:Carbamidomethylation:1000.00;C20:Carbamidomethylation:1000.00                                                                     |
| <b>LSSAANMMQ(+.98)MEWDELAAVAQAHANQC(+57.02)K</b>               | 67    | 3120,341 | 28 | 5,1  | 1041,126 | 47,71 | 0        | 1 | 16411 | 150211-Fr_I_Helo-red-alk-tryp-001.raw | 1   | 1   | JAW07031.1:JAW06995.1                     | Deamidation (NQ); Carbamidomethylation                                           | Q9:Deamidation (NQ):0.00;C27:Carbamidomethylation:1000.00                                                                                                             |
| <b>LATDDQC(+57.02)IVIEILSVTDK</b>                              | 66,85 | 2032,04  | 18 | -1,2 | 678,3531 | 48,38 | 0        | 1 | 16639 | 150211-Fr_I_Helo-red-alk-tryp-001.raw | 1   | 1   | AIJ02113.2                                | Carbamidomethylation                                                             | C7:Carbamidomethylation:1000.00                                                                                                                                       |
| <b>ADVDFGTIADSIK</b>                                           | 66,62 | 1485,733 | 14 | 1,2  | 496,2521 | 38,01 | 0        | 1 | 12941 | 150211-Fr_I_Helo-red-alk-tryp-001.raw | 1   | 1   | JAW07002.1:P86824.1                       | Sodium adduct                                                                    | D4:Sodium adduct:23.04                                                                                                                                                |
| <b>SHTFC(+57.02)TPSTC(+57.02)K</b>                             | 66,61 | 1324,554 | 11 | -0,5 | 663,2839 | 5,76  | 3,93E+07 | 1 | 1443  | 150211-Fr_I_Helo-red-alk-tryp-001.raw | 22  | 22  | JAW07031.1:JAW06995.1:JAG85161.1          | Carbamidomethylation                                                             | C5:Carbamidomethylation:1000.00;C10:Carbamidomethylation:1000.00                                                                                                      |
| <b>C(+57.02)AWPAC(+57.02)YC(+57.02)YGLPDSVK</b>                | 66,49 | 1945,816 | 16 | -1,2 | 973,9141 | 37,34 | 0        | 1 | 12692 | 150211-Fr_I_Helo-red-alk-tryp-001.raw | 4   | 4   | AAC25688.1:O77463.1: AAC25689.1           | Carbamidomethylation                                                             | C1:Carbamidomethylation:1000.00;C6:Carbamidomethylation:1000.00;C8:Carbamidomethylation:1000.00                                                                       |
| <b>ADVDFGTIAD(+21.98)SIK</b>                                   | 66,48 | 1485,733 | 14 | 0,9  | 743,8743 | 37,95 | 0        | 1 | 12915 | 150211-Fr_I_Helo-red-alk-tryp-001.raw | 2   | 2   | JAW07002.1:P86824.1                       | Sodium adduct                                                                    | D10:Sodium adduct:49.80                                                                                                                                               |
| <b>AEIDFSGIPEDIK</b>                                           | 66,41 | 1545,793 | 14 | -0,6 | 773,9031 | 43,43 | 6,01E+10 | 1 | 14899 | 150211-Fr_I_Helo-red-alk-tryp-001.raw | 371 | 371 | JAW06987.1:JAW07038.1:JAW06992.1:P84190.1 |                                                                                  |                                                                                                                                                                       |
| <b>DSWTQ(+.98)LYVC(+57.02)NYGPAGNLDDSELYKVDKPC(+57.02)EK</b>   | 66,23 | 3664,634 | 31 | 4,7  | 1222,558 | 45,28 | 0        | 1 | 15560 | 150211-Fr_I_Helo-red-alk-tryp-001.raw | 1   | 1   | JAW06991.1:JAW07032.1                     | Deamidation (NQ); Carbamidomethylation                                           | Q5:Deamidation (NQ):76.17;C9:Carbamidomet                                                                                                                             |



|                                                                |       |          |    |      |          |       |          |   |       |                                       |    |    |                                                    |                                                                                  |                                                                                                                               |  |                                                  |
|----------------------------------------------------------------|-------|----------|----|------|----------|-------|----------|---|-------|---------------------------------------|----|----|----------------------------------------------------|----------------------------------------------------------------------------------|-------------------------------------------------------------------------------------------------------------------------------|--|--------------------------------------------------|
|                                                                |       |          |    |      |          |       |          |   |       |                                       |    |    |                                                    |                                                                                  |                                                                                                                               |  | ylation:1000.00;C29:Carbamidomethylation:1000.00 |
| <b>EALAPEPAPE(+21.98)PAPEPAP EA</b>                            | 66,11 | 1903,882 | 19 | -3,3 | 952,9448 | 18,8  | 0        | 1 | 6206  | 150211-Fr_I_Helo-red-alk-tryp-001.raw | 9  | 9  | JAW07022.1:P86821.1                                | Sodium adduct                                                                    | E10:Sodium adduct:16.65                                                                                                       |  |                                                  |
| <b>QNEPS(+58.03)FIEDSAIPGHQQ VLDPVDLVK</b>                     | 66    | 2932,469 | 26 | -1,6 | 978,4954 | 46,36 | 0        | 1 | 15941 | 150211-Fr_I_Helo-red-alk-tryp-001.raw | 6  | 6  | AIJ02110.2                                         | 2 3-dihydro-2 2-dimethyl-7-benzofuranol N-methyl carbamate                       | S5:2 3-dihydro-2 2-dimethyl-7-benzofuranol N-methyl carbamate:61.30                                                           |  |                                                  |
| <b>ES(+58.03)LIPGEEVDFGHVVG NLNVLNC(+57.02)K</b>               | 65,96 | 2843,404 | 25 | -2,2 | 948,8065 | 52,93 | 0        | 1 | 18163 | 150211-Fr_I_Helo-red-alk-tryp-001.raw | 3  | 3  | AIJ02112.2                                         | 2 3-dihydro-2 2-dimethyl-7-benzofuranol N-methyl carbamate; Carbamidomethylation | S2:2 3-dihydro-2 2-dimethyl-7-benzofuranol N-methyl carbamate:1000.00;C24:Carbamidomethylation:1000.00                        |  |                                                  |
| <b>FGPNVAGET(+59.02)AASEVNF HFSAPHLIFPEGMK</b>                 | 65,89 | 3259,558 | 30 | 1,8  | 815,8983 | 52,12 | 0        | 1 | 17895 | 150211-Fr_I_Helo-red-alk-tryp-001.raw | 4  | 4  | JAW07031.1:JAW06995.1                              | Aminoethylcysteine                                                               | T9:Aminoethylcysteine:47.09                                                                                                   |  |                                                  |
| <b>C(+57.02)IVVEFLC(+57.02)VTES K</b>                          | 65,79 | 1582,773 | 13 | 1    | 528,5989 | 37,35 | 0        | 1 | 12695 | 150211-Fr_I_Helo-red-alk-tryp-001.raw | 3  | 3  | JAW07039.1:JAG85190.1                              | Carbamidomethylation                                                             | C1:Carbamidomethylation:1000.00;C8:Carbamidomethylation:1000.00                                                               |  |                                                  |
| <b>LTSQ(+.98)SEYAC(+57.02)PAID KFC(+57.02)EDHC(+57.02)AAK</b>  | 65,5  | 2701,146 | 23 | 5,1  | 901,3938 | 17,99 | 0        | 1 | 5895  | 150211-Fr_I_Helo-red-alk-tryp-001.raw | 4  | 4  | P86822.2:POC8W4.2:AFP87551.1                       | Deamidation (NQ); Carbamidomethylation                                           | Q4:Deamidation (NQ):1000.00;C9:Carbamidomethylation:1000.00;C16:Carbamidomethylation:1000.00;C20:Carbamidomethylation:1000.00 |  |                                                  |
| <b>ENSWVTDVALHQVFK</b>                                         | 65,43 | 1771,889 | 15 | -1,9 | 886,9503 | 36,66 | 0        | 1 | 12439 | 150211-Fr_I_Helo-red-alk-tryp-001.raw | 1  | 1  |                                                    |                                                                                  |                                                                                                                               |  |                                                  |
| <b>GMGDPREDGTVDIN(+.98)TAGI ANSAGVC(+57.02)KPC(+57.02)FK</b>   | 65,39 | 3137,422 | 30 | 3,6  | 1046,818 | 35,87 | 0        | 1 | 12150 | 150211-Fr_I_Helo-red-alk-tryp-001.raw | 1  | 1  | AIJ02109.2:P86392.3:V9Z9A3.1:AHE40589.1:AHE40588.1 | Deamidation (NQ); Carbamidomethylation                                           | N14:Deamidation (NQ):49.80;C25:Carbamidomethylation:1000.00;C28:Carbamidomethylation:1000.00                                  |  |                                                  |
| <b>FGPNVAGETAASEVNFHFSAPHLIFPEGM(+15.99)K(-.98)(+42.01)</b>    | 65,22 | 3257,56  | 30 | 0,5  | 815,3978 | 51,08 | 2,29E+09 | 1 | 17551 | 150211-Fr_I_Helo-red-alk-tryp-001.raw | 3  | 3  | JAW07031.1:JAW06995.1                              | Oxidation (M); Amidation; Acetylation (K)                                        | M29:Oxidation (M):1000.00;K30:Amidation:1000.00;K30:Acetylation (K):1000.00                                                   |  |                                                  |
| <b>S(+28.03)GAYFWPASDIPIK</b>                                  | 65,21 | 1578,808 | 14 | -0,9 | 790,4106 | 46,22 | 0        | 1 | 15891 | 150211-Fr_I_Helo-red-alk-tryp-001.raw | 5  | 5  | XP_023242894.1                                     | Ethylation                                                                       | S1:Ethylation:99.51                                                                                                           |  |                                                  |
| <b>C(+57.02)VEHLLSLPR</b>                                      | 65,19 | 1222,649 | 10 | -0,1 | 408,5569 | 31,56 | 0        | 1 | 10601 | 150211-Fr_I_Helo-red-alk-tryp-001.raw | 4  | 4  | AIJ02110.2:JAG85213.1                              | Carbamidomethylation                                                             | C1:Carbamidomethylation:1000.00                                                                                               |  |                                                  |
| <b>AEIDFSGIPED(-18.01)IIK</b>                                  | 65,19 | 1527,782 | 14 | 0,1  | 764,8983 | 45,55 | 2,80E+08 | 1 | 15654 | 150211-Fr_I_Helo-red-alk-tryp-001.raw | 27 | 27 | JAW06987.1:JAW07038.1:JAW06992.1:P84190.1          | Dehydration                                                                      | D11:Dehydration:51.47                                                                                                         |  |                                                  |
| <b>A(+27.99)DVDFGTGIADSIK</b>                                  | 65,13 | 1491,746 | 14 | -1,2 | 746,8792 | 46,68 | 0        | 1 | 16052 | 150211-Fr_I_Helo-red-alk-tryp-001.raw | 1  | 1  | P86824.1                                           | Formylation (Protein N-term)                                                     | A1:Formylation (Protein N-term):1000.00                                                                                       |  |                                                  |
| <b>A(+27.99)DVDFGTGIADSIK</b>                                  | 65,13 | 1491,746 | 14 | -1,2 | 746,8792 | 46,68 | 0        | 1 | 16052 | 150211-Fr_I_Helo-red-alk-tryp-001.raw | 1  | 1  | JAW07002.1                                         | Formylation                                                                      | A1:Formylation:89.58                                                                                                          |  |                                                  |
| <b>LLGNREPDGS(+59.02)VSTNTLG VANLGGAC(+57.02)NPC(+57.02)LK</b> | 65,01 | 3142,532 | 30 | -0,4 | 1048,518 | 37,02 | 0        | 1 | 12575 | 150211-Fr_I_Helo-red-alk-tryp-001.raw | 1  | 1  | AIJ02112.2                                         | Aminoethylcysteine; Carbamidomethylation                                         | S10:Aminoethylcysteine:6.59; C25:Carbamidomethylation:1000.00;C28:Carbamidomethylation:1000.00                                |  |                                                  |

J Venom Anim Toxins incl Trop Dis, 2019

|                                                        |       |          |    |      |          |       |          |   |       |                                       |    |    |                                                             |                                                                                  |                                                                                                                                                                      |
|--------------------------------------------------------|-------|----------|----|------|----------|-------|----------|---|-------|---------------------------------------|----|----|-------------------------------------------------------------|----------------------------------------------------------------------------------|----------------------------------------------------------------------------------------------------------------------------------------------------------------------|
| AEIDFSGIP(+31.99)EDIK                                  | 64,66 | 1577,782 | 14 | -1,1 | 789,8976 | 38,48 | 0        | 1 | 13110 | 150211-Fr_I_Helo-red-alk-tryp-001.raw | 8  | 8  | JAW06987.1:JAW07038.1:JAW06992.1:P84190.1                   | Dihydroxy                                                                        | P9:Dihydroxy:28.02                                                                                                                                                   |
| LIGVQAFAINTE(+21.98)PSFIK                              | 64,62 | 1869,001 | 17 | 1,2  | 935,509  | 46,84 | 0        | 1 | 16105 | 150211-Fr_I_Helo-red-alk-tryp-001.raw | 1  | 1  | AIJ02111.3                                                  | Sodium adduct                                                                    | E12:Sodium adduct:47.64                                                                                                                                              |
| ITC(+57.02)FLTAAGYC(+57.02)NTE(+37.96)C(+57.02)TLK     | 64,4  | 2159,909 | 18 | -1,4 | 1080,96  | 34,89 | 0        | 1 | 11796 | 150211-Fr_I_Helo-red-alk-tryp-001.raw | 3  | 3  | AAC25688.1:O77463.1: AAC25689.1                             | Carbamidomethylation; Replacement of proton by potassium                         | C3:Carbamidomethylation:1000.00;C11:Carbamidomethylation:1000.00;E14:Replacement of proton by potassium:46.21;C15:Carbamidomethylation:1000.00                       |
| AEIDFSGIPEDIKQIK                                       | 64,38 | 1915,03  | 17 | -0,3 | 639,3505 | 46,59 | 3,17E+08 | 1 | 16021 | 150211-Fr_I_Helo-red-alk-tryp-001.raw | 8  | 8  | JAW06987.1:JAW07038.1:JAW06992.1                            |                                                                                  |                                                                                                                                                                      |
| EDGTVDIN(+.98)TAGIANSAGVC(+57.02)KPC(+57.02)FK         | 64,34 | 2524,157 | 24 | 2,7  | 842,3953 | 35,03 | 0        | 1 | 11848 | 150211-Fr_I_Helo-red-alk-tryp-001.raw | 2  | 2  | AIJ02109.2:P86392.3:V9Z9A3.1:AHE40589.1:AHE40588.1          | Deamidation (NQ); Carbamidomethylation                                           | N8:Deamidation (NQ):72.73;C19:Carbamidomethylation:1000.00;C22:Carbamidomethylation:1000.00                                                                          |
| EALAPEPEPEPEPEPEAAPEA                                  | 63,72 | 2250,069 | 23 | -1,8 | 1126,04  | 35,78 | 0        | 1 | 12115 | 150211-Fr_I_Helo-red-alk-tryp-001.raw | 1  | 1  | JAW07022.1:P86821.1                                         |                                                                                  |                                                                                                                                                                      |
| AEIDFSGIPE(+21.98)DIKQ                                 | 63,53 | 1695,833 | 15 | -2,1 | 848,9221 | 42,31 | 0        | 1 | 14499 | 150211-Fr_I_Helo-red-alk-tryp-001.raw | 6  | 6  | JAW06987.1:JAW07038.1:JAW06992.1                            | Sodium adduct                                                                    | E10:Sodium adduct:15.10                                                                                                                                              |
| SEYAC(+57.02)PAIDKFC(+57.02)EDHC(+57.02)AA             | 63,23 | 2142,845 | 18 | 1,6  | 1072,431 | 15,86 | 0        | 1 | 5093  | 150211-Fr_I_Helo-red-alk-tryp-001.raw | 4  | 4  | P86822.2:POC8W4.2:AFP87551.1:Q0GY42.1:ABE98265.1:JAG85223.1 | Carbamidomethylation                                                             | C5:Carbamidomethylation:1000.00;C12:Carbamidomethylation:1000.00;C16:Carbamidomethylation:1000.00                                                                    |
| SVYDIEANPILLK                                          | 63,21 | 1473,808 | 13 | 0,6  | 737,9116 | 36,17 | 0        | 1 | 12257 | 150211-Fr_I_Helo-red-alk-tryp-001.raw | 1  | 1  | AIJ02118.2                                                  |                                                                                  |                                                                                                                                                                      |
| KGS(+58.03)SGYC(+57.02)AWPAC(+57.02)YC(+57.02)YGLPDSVK | 62,81 | 2583,111 | 22 | -1,7 | 1292,56  | 37,66 | 0        | 1 | 12807 | 150211-Fr_I_Helo-red-alk-tryp-001.raw | 9  | 9  | AAC25688.1:O77463.1: AAC25689.1                             | 2 3-dihydro-2 2-dimethyl-7-benzofuranol N-methyl carbamate; Carbamidomethylation | S3:2 3-dihydro-2 2-dimethyl-7-benzofuranol N-methyl carbamate:0.00;C7:Carbamidomethylation:1000.00;C12:Carbamidomethylation:1000.00;C14:Carbamidomethylation:1000.00 |
| KEALAPEPEPEPEPEPEA                                     | 62,72 | 2009,995 | 20 | -1   | 1006,004 | 18,8  | 5,06E+09 | 1 | 6203  | 150211-Fr_I_Helo-red-alk-tryp-001.raw | 79 | 79 | JAW07022.1:P86821.1                                         |                                                                                  |                                                                                                                                                                      |
| GIFDIADEILPITNFFR                                      | 62,65 | 2081,083 | 18 | -0,4 | 694,7014 | 61,18 | 6,52E+06 | 1 | 20835 | 150211-Fr_I_Helo-red-alk-tryp-001.raw | 3  | 3  | JAW07023.1                                                  |                                                                                  |                                                                                                                                                                      |
| AWPAC(+57.02)YC(+57.02)YGLPDSVK                        | 62,65 | 1785,785 | 15 | -1,2 | 893,8989 | 36,71 | 0        | 1 | 12456 | 150211-Fr_I_Helo-red-alk-tryp-001.raw | 3  | 3  | AAC25688.1:O77463.1: AAC25689.1                             | Carbamidomethylation                                                             | C5:Carbamidomethylation:1000.00;C7:Carbamidomethylation:1000.00                                                                                                      |
| AEIDFSGIPE(+37.96)DIK                                  | 62,6  | 1583,748 | 14 | -3,2 | 792,879  | 38,29 | 0        | 1 | 13043 | 150211-Fr_I_Helo-red-alk-tryp-001.raw | 29 | 29 | JAW06987.1:JAW07038.1:JAW06992.1:P84190.1                   | Replacement of proton by potassium                                               | E10:Replacement of proton by potassium:40.57                                                                                                                         |
| KQNEPSFIEDSAIPGHQ(+.98)QVLDPVDLVK                      | 62,57 | 3003,519 | 27 | 4,5  | 1002,185 | 41,71 | 0        | 1 | 14282 | 150211-Fr_I_Helo-red-alk-tryp-001.raw | 1  | 1  | AIJ02110.2                                                  | Deamidation (NQ)                                                                 | Q17:Deamidation (NQ):0.00                                                                                                                                            |
| LTSQSEYAC(+57.02)PAIDK                                 | 62,56 | 1581,735 | 14 | -1,1 | 791,8737 | 30,48 | 3,37E+08 | 1 | 10232 | 150211-Fr_I_Helo-red-alk-tryp-001.raw | 60 | 60 | P86822.2:POC8W4.2:AFP87551.1                                | Carbamidomethylation                                                             | C9:Carbamidomethylation:1000.00                                                                                                                                      |

J Venom Anim Toxins incl Trop Dis, 2019

|                                                        |       |          |    |      |          |       |          |   |       |                                       |    |    |                                    |                                                                                  |                                                                                                                                                                      |
|--------------------------------------------------------|-------|----------|----|------|----------|-------|----------|---|-------|---------------------------------------|----|----|------------------------------------|----------------------------------------------------------------------------------|----------------------------------------------------------------------------------------------------------------------------------------------------------------------|
| DGYFQDPDDC(+57.02)QK                                   | 62,56 | 1486,567 | 12 | -2,2 | 744,2891 | 30,43 | 0        | 1 | 10215 | 150211-Fr_I_Helo-red-alk-tryp-001.raw | 5  | 5  |                                    | Carbamidomethylation                                                             | C10:Carbamidomethylation:1000.00                                                                                                                                     |
| VGC(+57.02)GVAGYVENGVK                                 | 62,28 | 1407,682 | 14 | 0    | 704,8481 | 30,73 | 0        | 1 | 10317 | 150211-Fr_I_Helo-red-alk-tryp-001.raw | 16 | 16 | JAW07031.1:JAW06995.1:JAG85161.1   | Carbamidomethylation                                                             | C3:Carbamidomethylation:1000.00                                                                                                                                      |
| GTILVGVLVANLGR                                         | 62,17 | 1437,867 | 15 | 1,8  | 480,297  | 37,94 | 0        | 1 | 12914 | 150211-Fr_I_Helo-red-alk-tryp-001.raw | 2  | 2  | AMO02558.1:JAW07025.1:JAW06984.1   |                                                                                  |                                                                                                                                                                      |
| KEALAPEPAPEPAPEAAPEAAPEAAAAPE                          | 62,09 | 3282,593 | 34 | 0,6  | 1095,206 | 37,62 | 5,41E+09 | 1 | 12793 | 150211-Fr_I_Helo-red-alk-tryp-001.raw | 3  | 3  | JAW07022.1:P86821.1                |                                                                                  |                                                                                                                                                                      |
| WWGGEPIWVTAR                                           | 61,86 | 1456,725 | 12 | 1    | 729,3705 | 39,96 | 0        | 1 | 13645 | 150211-Fr_I_Helo-red-alk-tryp-001.raw | 24 | 24 | XP_023242894.1                     |                                                                                  |                                                                                                                                                                      |
| DADIIMLISNR                                            | 61,35 | 1259,654 | 11 | -0,4 | 630,8342 | 35,29 | 0        | 1 | 11939 | 150211-Fr_I_Helo-red-alk-tryp-001.raw | 11 | 11 | AIJ02110.2:JAG85213.1              |                                                                                  |                                                                                                                                                                      |
| FGC(+57.02)PAYEGYC(+57.02)N(+.98)DHC(+57.02)NDIER      | 61,26 | 2376,883 | 19 | 4,7  | 1189,455 | 14,25 | 0        | 1 | 4503  | 150211-Fr_I_Helo-red-alk-tryp-001.raw | 2  | 2  | POC2F3.1:P69940.2                  | Carbamidomethylation; Deamidation (NQ)                                           | C3:Carbamidomethylation:1000.00;C10:Carbamidomethylation:1000.00;N11:Deamidation (NQ):38.03;C14:Carbamidomethylation:1000.00                                         |
| VGC(+57.02)GVAGYVENGVKK                                | 61,16 | 1535,777 | 15 | 0,1  | 512,9329 | 30,28 | 0        | 1 | 10164 | 150211-Fr_I_Helo-red-alk-tryp-001.raw | 4  | 4  | JAW07031.1:JAW06995.1              | Carbamidomethylation                                                             | C3:Carbamidomethylation:1000.00                                                                                                                                      |
| VGVSLETDYNER                                           | 61,1  | 1495,679 | 13 | -0,2 | 748,8467 | 31,05 | 0        | 1 | 10428 | 150211-Fr_I_Helo-red-alk-tryp-001.raw | 13 | 13 | JAW07039.1:JAG85190.1:JAW07042.1   |                                                                                  |                                                                                                                                                                      |
| EALAPEPAPE(+37.96)PAPEPAP EA                           | 60,78 | 1919,855 | 19 | -2,5 | 960,9326 | 18,89 | 0        | 1 | 6239  | 150211-Fr_I_Helo-red-alk-tryp-001.raw | 3  | 3  | JAW07022.1:P86821.1                | Replacement of proton by potassium                                               | E10:Replacement of proton by potassium:32.11                                                                                                                         |
| AIITVVDNGIMIGC(+57.02)GIFD VASPSVK                     | 60,62 | 2575,339 | 25 | -1,2 | 859,4525 | 53,4  | 0        | 1 | 18316 | 150211-Fr_I_Helo-red-alk-tryp-001.raw | 1  | 1  | JAW07019.1:JAW06978.1              | Carbamidomethylation                                                             | C14:Carbamidomethylation:1000.00                                                                                                                                     |
| KEALAPEPAPEPAPEAAPE A                                  | 60,6  | 2378,164 | 24 | -0,6 | 1190,089 | 35,12 | 0        | 1 | 11877 | 150211-Fr_I_Helo-red-alk-tryp-001.raw | 4  | 4  | JAW07022.1:P86821.1                |                                                                                  |                                                                                                                                                                      |
| KEALAPEPAPEPAPEAAPE AAPEPAA                            | 60,49 | 2914,423 | 30 | -1   | 1458,218 | 36,5  | 6,23E+08 | 1 | 12377 | 150211-Fr_I_Helo-red-alk-tryp-001.raw | 1  | 1  | JAW07022.1:P86821.1                |                                                                                  |                                                                                                                                                                      |
| FGPN(+.98)VAGETAASEVNFHF SAPHLIFPEGM(+15.99)K          | 60,42 | 3217,518 | 30 | 3,6  | 805,3896 | 49,32 | 0        | 1 | 16959 | 150211-Fr_I_Helo-red-alk-tryp-001.raw | 1  | 1  | JAW07031.1:JAW06995.1              | Deamidation (NQ); Oxidation (M)                                                  | N4:Deamidation (NQ):67.73;M29:Oxidation (M):1000.00                                                                                                                  |
| AEIDFSGIPED(+21.98)IIKQ                                | 60,35 | 1695,833 | 15 | -1,1 | 848,9229 | 42,83 | 0        | 1 | 14684 | 150211-Fr_I_Helo-red-alk-tryp-001.raw | 3  | 3  | JAW06987.1:JAW07038.1:JAW06992.1   | Sodium adduct                                                                    | D11:Sodium adduct:0.00                                                                                                                                               |
| ANAEYLLSLTK                                            | 60,28 | 1221,661 | 11 | -0,1 | 611,8375 | 33,32 | 0        | 1 | 11228 | 150211-Fr_I_Helo-red-alk-tryp-001.raw | 6  | 6  | AIJ02113.2                         |                                                                                  |                                                                                                                                                                      |
| GS(+58.03)SGYC(+57.02)AWPA C(+57.02)YC(+57.02)YGLPDSVK | 60,2  | 2455,016 | 21 | -2,3 | 819,3439 | 43,54 | 0        | 1 | 14939 | 150211-Fr_I_Helo-red-alk-tryp-001.raw | 43 | 43 | AAC25688.1:O77463.1:AAC25689.1     | 2 3-dihydro-2 2-dimethyl-7-benzofuranol N-methyl carbamate; Carbamidomethylation | S2:2 3-dihydro-2 2-dimethyl-7-benzofuranol N-methyl carbamate:0.00;C6:Carbamidomethylation:1000.00;C11:Carbamidomethylation:1000.00;C13:Carbamidomethylation:1000.00 |
| IAFLPYGYILDKWR                                         | 59,93 | 1753,955 | 14 | -0,8 | 585,6586 | 49,94 | 0        | 1 | 17170 | 150211-Fr_I_Helo-red-alk-tryp-001.raw | 1  | 1  |                                    |                                                                                  |                                                                                                                                                                      |
| YAC(+57.02)PAIDKFC(+57.02)E DHC(+57.02)AAK             | 59,87 | 2054,865 | 17 | 0,5  | 514,7237 | 31,29 | 0        | 1 | 10510 | 150211-Fr_I_Helo-red-alk-tryp-001.raw | 1  | 1  | P86822.2:POC8W4.2:AFP87551.1:Q0GY4 | Carbamidomethylation                                                             | C3:Carbamidomethylation:1000.00;C10:Carbamidomethylati                                                                                                               |

|                                                               |       |          |    |      |          |       |          |   |       |                                       |    |                           |                                                                                                                |                                                      |                                                                                                                              |
|---------------------------------------------------------------|-------|----------|----|------|----------|-------|----------|---|-------|---------------------------------------|----|---------------------------|----------------------------------------------------------------------------------------------------------------|------------------------------------------------------|------------------------------------------------------------------------------------------------------------------------------|
|                                                               |       |          |    |      |          |       |          |   |       |                                       |    | 2.1:ABE98265.1:JAG85223.1 |                                                                                                                | on:1000.00;C14:Carbamidomethylation:1000.00          |                                                                                                                              |
| <b>E(+226.08)PSFIEDSAIPGHQQVLDPVDLVK</b>                      | 59,83 | 2858,416 | 24 | 0,2  | 1430,216 | 48,71 | 0        | 1 | 16749 | 150211-Fr_I_Helo-red-alk-tryp-001.raw | 2  | 2                         | AIJ02110.2                                                                                                     | Biotinylation                                        | E1:Biotinylation:165.29                                                                                                      |
| <b>DC(+57.02)PESDGYIMGSGNNK</b>                               | 59,83 | 1742,688 | 16 | -0,2 | 872,3509 | 30,54 | 0        | 1 | 10254 | 150211-Fr_I_Helo-red-alk-tryp-001.raw | 1  | 1                         | AIJ02110.2                                                                                                     | Carbamidomethylation                                 | C2:Carbamidomethylation:1000.00                                                                                              |
| <b>YANLGEFPWMVFIR</b>                                         | 59,82 | 1741,865 | 14 | -1,6 | 871,9384 | 56,69 | 0        | 1 | 19398 | 150211-Fr_I_Helo-red-alk-tryp-001.raw | 2  | 2                         | JAG85164.1                                                                                                     |                                                      |                                                                                                                              |
| <b>APEPAPEAAPEAAPEAAAAPE</b>                                  | 59,69 | 2052,964 | 22 | 0,3  | 1027,49  | 17,04 | 3,08E+09 | 1 | 5532  | 150211-Fr_I_Helo-red-alk-tryp-001.raw | 27 | 27                        | JAW07022.1:P86821.1                                                                                            |                                                      |                                                                                                                              |
| <b>AEIDFSGIPEDIK(+114.04)QIK</b>                              | 59,51 | 2029,073 | 17 | -0,9 | 677,3644 | 47,36 | 3,74E+08 | 1 | 16290 | 150211-Fr_I_Helo-red-alk-tryp-001.raw | 1  | 1                         | JAW06987.1:JAW07038.1:JAW06992.1                                                                               | Ubiquitin                                            | K14:Ubiquitin:12.16                                                                                                          |
| <b>YFFTLQASC(+57.02)LR</b>                                    | 59,43 | 1501,739 | 12 | 0,4  | 751,877  | 38,7  | 0        | 1 | 13190 | 150211-Fr_I_Helo-red-alk-tryp-001.raw | 7  | 7                         | JAW07039.1                                                                                                     | Carbamidomethylation                                 | C10:Carbamidomethylation:1000.00                                                                                             |
| <b>KNVLVIAPPDPSVFSDDPRDIELAK</b>                              | 59,33 | 2734,454 | 25 | -0,6 | 684,6204 | 46,58 | 3,02E+08 | 1 | 16017 | 150211-Fr_I_Helo-red-alk-tryp-001.raw | 1  | 1                         | AIJ02118.2                                                                                                     |                                                      |                                                                                                                              |
| <b>DVDFGTGIADSIK</b>                                          | 59,05 | 1392,714 | 13 | -0,5 | 697,3638 | 41,74 | 0        | 1 | 14292 | 150211-Fr_I_Helo-red-alk-tryp-001.raw | 19 | 19                        | JAW07002.1:P86824.1                                                                                            |                                                      |                                                                                                                              |
| <b>A(+43.01)EIDFSGIPEDIK</b>                                  | 59    | 1588,798 | 14 | -0,9 | 795,4058 | 46,5  | 0        | 1 | 15989 | 150211-Fr_I_Helo-red-alk-tryp-001.raw | 1  | 1                         | JAW06987.1:JAW07038.1:JAW06992.1:P84190.1                                                                      | Carbamylation                                        | A1:Carbamylation:98.05                                                                                                       |
| <b>FC(+57.02)EDHC(+57.02)AAK</b>                              | 58,91 | 1136,438 | 9  | -0,1 | 569,2261 | 5,6   | 0        | 1 | 1389  | 150211-Fr_I_Helo-red-alk-tryp-001.raw | 69 | 69                        | P86822.2:POC8W4.2:AFP87551.1:Q0GY42.1:ABE98265.1:JAG85223.1:ABV64385.1:ABE98262.1:Q0GY45.1:Q0GY43.1:ABE98264.1 | Carbamidomethylation                                 | C2:Carbamidomethylation:1000.00;C6:Carbamidomethylation:1000.00                                                              |
| <b>IRPAGFC(+57.02)DGYC(+57.02)K</b>                           | 58,88 | 1442,643 | 12 | 0,1  | 481,8885 | 30,09 | 0        | 1 | 10104 | 150211-Fr_I_Helo-red-alk-tryp-001.raw | 7  | 7                         | JAW07016.1:JAW06979.1:P68411.1:1913435A:P68410.1:AA836322.1                                                    | Carbamidomethylation                                 | C7:Carbamidomethylation:1000.00;C11:Carbamidomethylation:1000.00                                                             |
| <b>SSGYC(+57.02)AWPAC(+57.02)YC(+57.02)YGLPDSVK</b>           | 58,73 | 2339,965 | 20 | -1,1 | 1170,988 | 43,38 | 0        | 1 | 14882 | 150211-Fr_I_Helo-red-alk-tryp-001.raw | 2  | 2                         | AAC25688.1:O77463.1:AA25689.1                                                                                  | Carbamidomethylation                                 | C5:Carbamidomethylation:1000.00;C10:Carbamidomethylation:1000.00;C12:Carbamidomethylation:1000.00                            |
| <b>KTQ(+.98)FGC(+57.02)PAYEGYC(+57.02)NDHC(+57.02)NDIER</b>   | 58,71 | 2734,085 | 22 | 3,5  | 912,372  | 19,95 | 0        | 1 | 6641  | 150211-Fr_I_Helo-red-alk-tryp-001.raw | 13 | 13                        | POC2F3.1:P69940.2                                                                                              | Deamidation (NQ);<br>Carbamidomethylation            | Q3:Deamidation (NQ):108.57;C6:Carbamidomethylation:1000.00;C13:Carbamidomethylation:1000.00;C17:Carbamidomethylation:1000.00 |
| <b>APEAAPEAAPE(+21.98)PAAAAPE</b>                             | 58,57 | 1680,761 | 18 | -3,4 | 841,3848 | 13,58 | 0        | 1 | 4259  | 150211-Fr_I_Helo-red-alk-tryp-001.raw | 3  | 3                         | JAW07022.1:P86821.1                                                                                            | Sodium adduct                                        | E11:Sodium adduct:55.25                                                                                                      |
| <b>K(+58.01)TQFGC(+57.02)PAYEGYC(+57.02)NDHC(+57.02)NDIER</b> | 58,44 | 2791,106 | 22 | 4,8  | 931,3804 | 14,21 | 0        | 1 | 4488  | 150211-Fr_I_Helo-red-alk-tryp-001.raw | 4  | 4                         | POC2F3.1:P69940.2                                                                                              | Carboxymethyl (KW X@N-term);<br>Carbamidomethylation | K1:Carboxymethyl (KW X@N-term):1000.00;C6:Carbamidomethylation:1000.00;C13:Carbamidomethylation:1000.00;C1                   |

J Venom Anim Toxins incl Trop Dis, 2019

|                                                              |       |          |    |      |          |       |          |   |       |                                       |    |    |                                                                                   |                                                                                  |  |  |  |                                                                                                                              |                                |
|--------------------------------------------------------------|-------|----------|----|------|----------|-------|----------|---|-------|---------------------------------------|----|----|-----------------------------------------------------------------------------------|----------------------------------------------------------------------------------|--|--|--|------------------------------------------------------------------------------------------------------------------------------|--------------------------------|
|                                                              |       |          |    |      |          |       |          |   |       |                                       |    |    |                                                                                   |                                                                                  |  |  |  |                                                                                                                              | 7:Carbamidomethylation:1000.00 |
| VKPPTAKPPPQYFEFK                                             | 58,34 | 1873,014 | 16 | -1,1 | 469,2602 | 18,18 | 5,49E+08 | 1 | 5966  | 150211-Fr_I_Helo-red-alk-tryp-001.raw | 5  | 5  | JAW07031.1:JAW06995.1                                                             |                                                                                  |  |  |  |                                                                                                                              |                                |
| AEIDFSGIPE(+37.95)DIK                                        | 58,18 | 1583,74  | 14 | -0,2 | 792,8769 | 38,09 | 0        | 1 | 12973 | 150211-Fr_I_Helo-red-alk-tryp-001.raw | 28 | 28 | JAW06987.1:JAW07038.1:JAW06992.1:P84190.1                                         | Replacement of 2 protons by calcium                                              |  |  |  | E10:Replacement of 2 protons by calcium:24.44                                                                                |                                |
| EALAPEPAPEPAPEP                                              | 58,18 | 1513,73  | 15 | -0,4 | 757,8719 | 34,05 | 0        | 1 | 11495 | 150211-Fr_I_Helo-red-alk-tryp-001.raw | 51 | 51 | JAW07022.1:P86821.1                                                               |                                                                                  |  |  |  |                                                                                                                              |                                |
| APEPAPEAAPEAAPE(+21.98)PAAAPE                                | 58,04 | 2074,946 | 22 | -3,5 | 1038,477 | 15,93 | 0        | 1 | 5119  | 150211-Fr_I_Helo-red-alk-tryp-001.raw | 1  | 1  | JAW07022.1:P86821.1                                                               | Sodium adduct                                                                    |  |  |  | E15:Sodium adduct:25.39                                                                                                      |                                |
| S(+59.02)SGYC(+57.02)AWPAC(+57.02)YC(+57.02)YGLPDSVKIWTSETNK | 57,97 | 3358,456 | 28 | 2,6  | 1120,495 | 49,46 | 0        | 1 | 17008 | 150211-Fr_I_Helo-red-alk-tryp-001.raw | 1  | 1  | AAC25688.1:O77463.1: AAC25689.1                                                   | Aminoethylcysteine; Carbamidomethylation                                         |  |  |  | S1:Aminoethylcysteine:0.00;C5:Carbamidomethylation:1000.00;C10:Carbamidomethylation:1000.00;C12:Carbamidomethylation:1000.00 |                                |
| LVLIGLTLVKDDLPIR                                             | 57,73 | 1924,176 | 17 | 2    | 963,0972 | 54,72 | 0        | 1 | 18743 | 150211-Fr_I_Helo-red-alk-tryp-001.raw | 2  | 2  | AMO02560.1                                                                        |                                                                                  |  |  |  |                                                                                                                              |                                |
| E(-18.01)IDFSGIPEDIK                                         | 57,66 | 1456,745 | 13 | -0,3 | 729,3795 | 46,88 | 8,48E+08 | 1 | 16121 | 150211-Fr_I_Helo-red-alk-tryp-001.raw | 15 | 15 | JAW06987.1:JAW07038.1:JAW06992.1:P84190.1                                         | Pyro-glu from E                                                                  |  |  |  | E1:Pyro-glu from E:1000.00                                                                                                   |                                |
| GAPAQYLDISYIR                                                | 57,57 | 1465,757 | 13 | -0,6 | 733,8851 | 33,44 | 1,83E+08 | 1 | 11272 | 150211-Fr_I_Helo-red-alk-tryp-001.raw | 1  | 1  | JAW06991.1:JAW07032.1:JAG85159.1                                                  |                                                                                  |  |  |  |                                                                                                                              |                                |
| FSAPHLIFPEGMK                                                | 57,54 | 1472,749 | 13 | 0,4  | 491,9236 | 36,59 | 0        | 1 | 12411 | 150211-Fr_I_Helo-red-alk-tryp-001.raw | 1  | 1  | JAW07031.1:JAW06995.1                                                             |                                                                                  |  |  |  |                                                                                                                              |                                |
| LTAAGYC(+57.02)NTEC(+57.02)TLK                               | 57,52 | 1600,723 | 14 | -0,8 | 801,3679 | 30,71 | 0        | 1 | 10311 | 150211-Fr_I_Helo-red-alk-tryp-001.raw | 37 | 37 | AAC25688.1:O77463.1: AAC25689.1                                                   | Carbamidomethylation                                                             |  |  |  | C7:Carbamidomethylation:1000.00;C11:Carbamidomethylation:1000.00                                                             |                                |
| S(+28.03)GAYFWPASDIPIKDTF                                    | 57,18 | 1941,951 | 17 | -0,5 | 971,9824 | 51,92 | 0        | 1 | 17830 | 150211-Fr_I_Helo-red-alk-tryp-001.raw | 1  | 1  | XP_023242894.1                                                                    | Ethylation                                                                       |  |  |  | S1:Ethylation:140.79                                                                                                         |                                |
| C(+57.02)ISANLVGILFYDILR                                     | 57,08 | 1866,007 | 16 | 0    | 623,0097 | 59,53 | 0        | 1 | 20310 | 150211-Fr_I_Helo-red-alk-tryp-001.raw | 1  | 1  | JAW07019.1:JAW06978.1                                                             | Carbamidomethylation                                                             |  |  |  | C1:Carbamidomethylation:1000.00                                                                                              |                                |
| VQNIFDTLEGIK                                                 | 57,06 | 1488,819 | 13 | -0,7 | 745,4161 | 42,22 | 0        | 1 | 14464 | 150211-Fr_I_Helo-red-alk-tryp-001.raw | 11 | 11 | AIJ02113.2                                                                        |                                                                                  |  |  |  |                                                                                                                              |                                |
| DTDLIFLITAR                                                  | 56,92 | 1276,703 | 11 | -1,1 | 639,3579 | 43,34 | 0        | 1 | 14868 | 150211-Fr_I_Helo-red-alk-tryp-001.raw | 10 | 10 | AIJ02109.2:P86392.3:V9Z9A3.1:AHE40589.1:AHE40588.1:JAG85220.1:AHE40596.1:V9ZAY0.1 |                                                                                  |  |  |  |                                                                                                                              |                                |
| FSC(+57.02)FIRPAGFC(+57.02)D                                 | 56,84 | 1475,633 | 12 | 0,1  | 738,8237 | 33,03 | 0        | 1 | 11126 | 150211-Fr_I_Helo-red-alk-tryp-001.raw | 1  | 1  | JAW07016.1:JAW06979.1:P68411.1:1913435A:P68410.1:AA B36322.1                      | Carbamidomethylation                                                             |  |  |  | C3:Carbamidomethylation:1000.00;C11:Carbamidomethylation:1000.00                                                             |                                |
| LTSSEYAC(+57.02)PAIDKFC(+57.02)JEDHC(+57.02)AA               | 56,72 | 2573,051 | 22 | 4,8  | 858,695  | 18,79 | 0        | 1 | 6199  | 150211-Fr_I_Helo-red-alk-tryp-001.raw | 2  | 2  | Q0GY42.1:ABE98265.1:JAG85223.1                                                    | Carbamidomethylation                                                             |  |  |  | C9:Carbamidomethylation:1000.00;C16:Carbamidomethylation:1000.00;C20:Carbamidomethylation:1000.00                            |                                |
| S(+58.03)SGYC(+57.02)AWPAC(+57.02)YC(+57.02)YGLPDSVK         | 56,68 | 2397,994 | 20 | -3,2 | 1200,001 | 45,7  | 0        | 1 | 15708 | 150211-Fr_I_Helo-red-alk-tryp-001.raw | 35 | 35 | AAC25688.1:O77463.1: AAC25689.1                                                   | 2 3-dihydro-2 2-dimethyl-7-benzofuranol N-methyl carbamate; Carbamidomethylation |  |  |  | S1:2 3-dihydro-2 2-dimethyl-7-benzofuranol N-methyl carbamate:0.00;C5:Carbamidomethylation:1000.00;C10:Carb                  |                                |

J Venom Anim Toxins incl Trop Dis, 2019

|                                                               |       |          |    |      |          |       |          |   |       |                                       |    |    |                                           |                                                            |                                                                                                                                 |  |  |  |                                                           |
|---------------------------------------------------------------|-------|----------|----|------|----------|-------|----------|---|-------|---------------------------------------|----|----|-------------------------------------------|------------------------------------------------------------|---------------------------------------------------------------------------------------------------------------------------------|--|--|--|-----------------------------------------------------------|
|                                                               |       |          |    |      |          |       |          |   |       |                                       |    |    |                                           |                                                            |                                                                                                                                 |  |  |  | amidomethylation:1000.00;C12:Carbamidomethylation:1000.00 |
| <b>FTGVQNLDTLNLGIK</b>                                        | 56,67 | 1744,972 | 16 | -0,3 | 582,6646 | 49,73 | 0        | 1 | 17101 | 150211-Fr_I_Helo-red-alk-tryp-001.raw | 1  | 1  | AIJ02110.2                                |                                                            |                                                                                                                                 |  |  |  |                                                           |
| <b>KT(+59.02)QFGC(+57.02)PAYEGYC(+57.02)NDHC(+57.02)NDIER</b> | 56,53 | 2792,12  | 22 | -3,8 | 931,7104 | 14,88 | 0        | 1 | 4731  | 150211-Fr_I_Helo-red-alk-tryp-001.raw | 3  | 3  | POC2F3.1:P69940.2                         | Aminoethylcysteine; Carbamidomethylation                   | T2:Aminoethylcysteine:1000.00;C6:Carbamidomethylation:1000.00;C13:Carbamidomethylation:1000.00;C17:Carbamidomethylation:1000.00 |  |  |  |                                                           |
| <b>QNEPSFIEDS(+58.03)AIPGHQQVLDPVDLVK</b>                     | 56,4  | 2932,469 | 26 | -2,3 | 978,4948 | 45,99 | 0        | 1 | 15810 | 150211-Fr_I_Helo-red-alk-tryp-001.raw | 4  | 4  | AIJ02110.2                                | 2 3-dihydro-2 2-dimethyl-7-benzofuranol N-methyl carbamate | S10:2 3-dihydro-2 2-dimethyl-7-benzofuranol N-methyl carbamate:1.86                                                             |  |  |  |                                                           |
| <b>AEIDFSGIPEDIKQ</b>                                         | 55,67 | 1673,851 | 15 | -0,1 | 837,9328 | 39,05 | 3,37E+09 | 1 | 13315 | 150211-Fr_I_Helo-red-alk-tryp-001.raw | 92 | 92 | JAW06987.1:JAW07038.1:JAW06992.1          |                                                            |                                                                                                                                 |  |  |  |                                                           |
| <b>AEIDFSGIPEDIKEI</b>                                        | 55,59 | 1787,919 | 16 | -0,5 | 894,9664 | 51,12 | 1,28E+09 | 1 | 17564 | 150211-Fr_I_Helo-red-alk-tryp-001.raw | 20 | 20 | P84190.1                                  |                                                            |                                                                                                                                 |  |  |  |                                                           |
| <b>LSS(+59.02)AANMMQMEWDD ELAAVAQAHANQC(+57.02)K</b>          | 55,13 | 3178,376 | 28 | 1,2  | 795,6023 | 37,1  | 0        | 1 | 12604 | 150211-Fr_I_Helo-red-alk-tryp-001.raw | 1  | 1  | JAW07031.1:JAW06995.1                     | Aminoethylcysteine; Carbamidomethylation                   | S3:Aminoethylcysteine:0.00;C27:Carbamidomethylation:1000.00                                                                     |  |  |  |                                                           |
| <b>YFFTLPQASC(+57.02)LREDC(+57.02)PNSG</b>                    | 55,13 | 2260,988 | 19 | 1,1  | 1131,503 | 42,77 | 0        | 1 | 14661 | 150211-Fr_I_Helo-red-alk-tryp-001.raw | 1  | 1  | JAW07039.1                                | Carbamidomethylation                                       | C10:Carbamidomethylation:1000.00;C15:Carbamidomethylation:1000.00                                                               |  |  |  |                                                           |
| <b>VDFGTGIADSIK</b>                                           | 55,01 | 1277,687 | 12 | -0,1 | 639,8505 | 37,38 | 0        | 1 | 12706 | 150211-Fr_I_Helo-red-alk-tryp-001.raw | 9  | 9  | JAW07002.1:P86824.1                       |                                                            |                                                                                                                                 |  |  |  |                                                           |
| <b>FGPNVAGETAAS(+58.03)EVNFHFSAPHLIFPEGMK</b>                 | 54,97 | 3258,568 | 30 | -1,5 | 652,7199 | 51,93 | 0        | 1 | 17834 | 150211-Fr_I_Helo-red-alk-tryp-001.raw | 2  | 2  | JAW07031.1:JAW06995.1                     | 2 3-dihydro-2 2-dimethyl-7-benzofuranol N-methyl carbamate | S12:2 3-dihydro-2 2-dimethyl-7-benzofuranol N-methyl carbamate:38.64                                                            |  |  |  |                                                           |
| <b>KC(+57.02)VEHLLSLPR</b>                                    | 54,77 | 1350,744 | 11 | 0,1  | 451,2554 | 30,7  | 0        | 1 | 10307 | 150211-Fr_I_Helo-red-alk-tryp-001.raw | 1  | 1  | AIJ02110.2:JAG85213.1                     | Carbamidomethylation                                       | C2:Carbamidomethylation:1000.00                                                                                                 |  |  |  |                                                           |
| <b>KEALAPEPAPEPEP</b>                                         | 54,53 | 1641,825 | 16 | -0,7 | 821,9192 | 23,26 | 2,16E+09 | 1 | 7854  | 150211-Fr_I_Helo-red-alk-tryp-001.raw | 90 | 90 | JAW07022.1:P86821.1                       |                                                            |                                                                                                                                 |  |  |  |                                                           |
| <b>AEID(+37.95)FSGIPEDIK</b>                                  | 54,46 | 1583,74  | 14 | 1,7  | 528,9213 | 38,76 | 9,13E+05 | 1 | 13212 | 150211-Fr_I_Helo-red-alk-tryp-001.raw | 12 | 12 | JAW06987.1:JAW07038.1:JAW06992.1:P84190.1 | Replacement of 2 protons by calcium                        | D4:Replacement of 2 protons by calcium:24.55                                                                                    |  |  |  |                                                           |
| <b>FFLNKDEASC(+57.02)VVSAC(+57.02)</b>                        | 54,34 | 1745,775 | 15 | -2,5 | 873,8928 | 17,34 | 0        | 1 | 5649  | 150211-Fr_I_Helo-red-alk-tryp-001.raw | 1  | 1  | AIJ02112.2                                | Carbamidomethylation                                       | C10:Carbamidomethylation:1000.00;C15:Carbamidomethylation:1000.00                                                               |  |  |  |                                                           |
| <b>EALAPEPAPE(+21.98)PAPEP</b>                                | 54,09 | 1535,712 | 15 | -1,5 | 768,8621 | 16,76 | 0        | 1 | 5428  | 150211-Fr_I_Helo-red-alk-tryp-001.raw | 2  | 2  | JAW07022.1:P86821.1                       | Sodium adduct                                              | E10:Sodium adduct:21.91                                                                                                         |  |  |  |                                                           |
| <b>IDFSGIPEDIK</b>                                            | 53,98 | 1345,713 | 12 | 0,8  | 673,8643 | 38    | 2,12E+09 | 1 | 12936 | 150211-Fr_I_Helo-red-alk-tryp-001.raw | 93 | 93 | JAW06987.1:JAW07038.1:JAW06992.1:P84190.1 |                                                            |                                                                                                                                 |  |  |  |                                                           |
| <b>AEIDFSGIPEDIK(+27.99)QIK</b>                               | 53,88 | 1943,025 | 17 | 3,4  | 972,5231 | 49,22 | 0        | 1 | 16925 | 150211-Fr_I_Helo-red-alk-tryp-001.raw | 1  | 1  | JAW06987.1:JAW07038.1:JAW06992.1          | Formylation                                                | K14:Formylation:18.00                                                                                                           |  |  |  |                                                           |
| <b>T(+58.01)QFGC(+57.02)PAYEGYC(+57.02)NDHC(+57.02)NDIER</b>  | 53,76 | 2663,011 | 21 | 4,9  | 1332,519 | 15,32 | 0        | 1 | 4895  | 150211-Fr_I_Helo-red-alk-tryp-001.raw | 2  | 2  | POC2F3.1:P69940.2                         | Carboxymethyl (KW X@N-term); Carbamidomethylation          | T1:Carboxymethyl (KW X@N-term):1000.00;C5:Carbamidomethylation:1000.00;C12:Carbamidomethylation:1000.00;C1                      |  |  |  |                                                           |

|                                                             |       |          |    |      |          |       |          |   |       |                                       |     |     |                                                                                                                                                                   |                                                                                  |  |  |                                                                                                          |
|-------------------------------------------------------------|-------|----------|----|------|----------|-------|----------|---|-------|---------------------------------------|-----|-----|-------------------------------------------------------------------------------------------------------------------------------------------------------------------|----------------------------------------------------------------------------------|--|--|----------------------------------------------------------------------------------------------------------|
|                                                             |       |          |    |      |          |       |          |   |       |                                       |     |     |                                                                                                                                                                   |                                                                                  |  |  | 6:Carbamidomethylation:1000.00                                                                           |
| <b>DGEC(+57.02)HGFK</b>                                     | 53,73 | 948,3759 | 8  | -0,3 | 475,1951 | 15,39 | 0        | 1 | 4921  | 150211-Fr_I_Helo-red-alk-tryp-001.raw | 126 | 126 | POC2F3.1:P69940.2:Q5G8A6.1:JAG85216.1:AAW72464.1:AAW72465.1                                                                                                       | Carbamidomethylation                                                             |  |  | C4:Carbamidomethylation:1000.00                                                                          |
| <b>ADVDFTGIAESIIK(+43.01)</b>                               | 53,65 | 1520,772 | 14 | 1    | 761,3942 | 37,94 | 0        | 1 | 12913 | 150211-Fr_I_Helo-red-alk-tryp-001.raw | 1   | 1   |                                                                                                                                                                   | Carbamylation                                                                    |  |  | K14:Carbamylation:90.97                                                                                  |
| <b>ALAPEPAPEPAPEPAPEA</b>                                   | 53,49 | 1752,857 | 18 | -0,6 | 877,4352 | 34,89 | 0        | 1 | 11798 | 150211-Fr_I_Helo-red-alk-tryp-001.raw | 7   | 7   | JAW07022.1:P86821.1                                                                                                                                               |                                                                                  |  |  |                                                                                                          |
| <b>T(+114.04)ILVGLVGLVANLGR</b>                             | 53,38 | 1494,888 | 14 | 0    | 748,4514 | 37,96 | 0        | 1 | 12921 | 150211-Fr_I_Helo-red-alk-tryp-001.raw | 2   | 2   | AMO02558.1:JAW07025.1:JAW06984.1                                                                                                                                  | Ubiquitin                                                                        |  |  | T1:Ubiquitin:1000.00                                                                                     |
| <b>AEIDFSGIP(+15.99)EDIK</b>                                | 53,36 | 1561,788 | 14 | -1,8 | 781,8996 | 38,47 | 0        | 1 | 13109 | 150211-Fr_I_Helo-red-alk-tryp-001.raw | 19  | 19  | JAW06987.1:JAW07038.1:JAW06992.1:P84190.1                                                                                                                         | Oxidation or Hydroxylation                                                       |  |  | P9:Oxidation or Hydroxylation:41.39                                                                      |
| <b>FGPNVAGETAAS(+59.02)EVNFHFSAPHLIFPEGMIK</b>              | 53,05 | 3259,558 | 30 | 1,8  | 652,92   | 50,99 | 0        | 1 | 17522 | 150211-Fr_I_Helo-red-alk-tryp-001.raw | 4   | 4   | JAW07031.1:JAW06995.1                                                                                                                                             | Aminoethylcysteine                                                               |  |  | S12:Aminoethylcysteine:0.00                                                                              |
| <b>KGSSGYC(+57.02)AWPAC(+57.02)Y</b>                        | 53,05 | 1505,607 | 13 | -2   | 753,8091 | 33,07 | 0        | 1 | 11140 | 150211-Fr_I_Helo-red-alk-tryp-001.raw | 1   | 1   | AAC25688.1:O77463.1:AAW72453.1:Q5G8B8.1:AAB29128.1:P56612.1:AA81145.1:CAA46982.1:P15226.2:P0DMM8.1:1NPI:1B7D:AAB36321.1:AAB36318.1:P56611.1:JAG85191.1:JAG85210.1 | Carbamidomethylation                                                             |  |  | C7:Carbamidomethylation:1000.00;C12:Carbamidomethylation:1000.00                                         |
| <b>AEID(+37.96)FSGIPEDIK</b>                                | 52,97 | 1583,748 | 14 | -1,8 | 528,9225 | 40,89 | 0        | 1 | 13981 | 150211-Fr_I_Helo-red-alk-tryp-001.raw | 4   | 4   | JAW06987.1:JAW07038.1:JAW06992.1:P84190.1                                                                                                                         | Replacement of proton by potassium                                               |  |  | D4:Replacement of proton by potassium:14.08                                                              |
| <b>AEIDFSGIPEDIKQI</b>                                      | 52,93 | 1786,935 | 16 | 0,1  | 894,4749 | 49,99 | 1,74E+08 | 1 | 17187 | 150211-Fr_I_Helo-red-alk-tryp-001.raw | 2   | 2   | JAW06987.1:JAW07038.1:JAW06992.1                                                                                                                                  |                                                                                  |  |  |                                                                                                          |
| <b>S(+162.08)GYC(+57.02)AWPAC(+57.02)YC(+57.02)YGLPDSVK</b> | 52,8  | 2415,014 | 19 | 0,2  | 806,0121 | 42,39 | 0        | 1 | 14525 | 150211-Fr_I_Helo-red-alk-tryp-001.raw | 15  | 15  | AAC25688.1:O77463.1:AAW72453.1:Q5G8B8.1:AAB29128.1:P56612.1:AA81145.1:CAA46982.1:P15226.2:P0DMM8.1:1NPI:1B7D:AAB36321.1:AAB36318.1:P56611.1:JAG85191.1:JAG85210.1 | O-Pinacolylmethylphosphorylation; Carbamidomethylation                           |  |  | S1:O-Pinacolylmethylphosphorylation:0.00;C4:Carbamidomethylation:1000.00;C9:Carbamidomethylation:1000.00 |
| <b>ESLIPGEEVDFGHVGNL(+21.98)</b>                            | 52,6  | 2078,992 | 19 | -0,3 | 694,0045 | 52,18 | 0        | 1 | 17917 | 150211-Fr_I_Helo-red-alk-tryp-001.raw | 1   | 1   | AIJ02112.2                                                                                                                                                        | Sodium adduct                                                                    |  |  | L19:Sodium adduct:7.49                                                                                   |
| <b>S(+28.03)GAYFWPASDIPIKD</b>                              | 52,44 | 1693,835 | 15 | -1,5 | 847,9235 | 46    | 0        | 1 | 15815 | 150211-Fr_I_Helo-red-alk-tryp-001.raw | 2   | 2   | XP_023242894.1                                                                                                                                                    | Ethylation                                                                       |  |  | S1:Ethylation:91.09                                                                                      |
| <b>LS(+58.03)SAANMMQMEWDD ELAAVAQAHAHQ(+57.02)K</b>         | 52,36 | 3177,386 | 28 | -2,9 | 795,3515 | 43,02 | 0        | 1 | 14752 | 150211-Fr_I_Helo-red-alk-tryp-001.raw | 1   | 1   | JAW07031.1:JAW06995.1                                                                                                                                             | 2 3-dihydro-2 2-dimethyl-7-benzofuranol N-methyl carbamate; Carbamidomethylation |  |  | S2:2 3-dihydro-2 2-dimethyl-7-benzofuranol N-methyl carbamate:0.00;C27:Carbamidomethylation:1000.00      |
| <b>EIDFSGIPEDIK</b>                                         | 52,35 | 1474,756 | 13 | -0,4 | 738,3847 | 42,25 | 0        | 1 | 14475 | 150211-Fr_I_Helo-red-alk-tryp-001.raw | 25  | 25  | JAW06987.1:JAW07038.1:JAW06992.1:P84190.1                                                                                                                         |                                                                                  |  |  |                                                                                                          |

J Venom Anim Toxins incl Trop Dis, 2019

|                                                                           |       |          |    |      |          |       |          |   |   |       |                                       |    |    |                                                                                                                         |                                                                                  |                                                                                                                                                                         |
|---------------------------------------------------------------------------|-------|----------|----|------|----------|-------|----------|---|---|-------|---------------------------------------|----|----|-------------------------------------------------------------------------------------------------------------------------|----------------------------------------------------------------------------------|-------------------------------------------------------------------------------------------------------------------------------------------------------------------------|
| <b>APEPAPEAAPE(+37.96)AAPEPA<br/>AAAPE</b>                                | 52,35 | 2090,92  | 22 | -0,8 | 1046,466 | 16,14 |          | 0 | 1 | 5196  | 150211-Fr_I_Helo-red-alk-tryp-001.raw | 1  | 1  | JAW07022.1:P86821.1                                                                                                     | Replacement of proton by potassium                                               | E11:Replacement of proton by potassium:0.00                                                                                                                             |
| <b>QN(+.98)EPSFIEDSAIPGHQQVL<br/>DPVDLVK</b>                              | 52,29 | 2875,424 | 26 | 4,8  | 959,4865 | 48,09 |          | 0 | 1 | 16538 | 150211-Fr_I_Helo-red-alk-tryp-001.raw | 2  | 2  | AIJ02110.2                                                                                                              | Deamidation (NQ)                                                                 | N2:Deamidation (NQ):0.00                                                                                                                                                |
| <b>GT(+114.04)ILVGVLVANLGR</b>                                            | 52,14 | 1551,91  | 15 | 1,7  | 776,9634 | 47,39 |          | 0 | 1 | 16301 | 150211-Fr_I_Helo-red-alk-tryp-001.raw | 1  | 1  | AM002558.1:JAW07025.1:JAW06984.1                                                                                        | Ubiquitin                                                                        | T2:Ubiquitin:1000.00                                                                                                                                                    |
| <b>VTGSAIGIALGASAC(+57.02)NK</b>                                          | 52,12 | 1588,824 | 17 | 0,5  | 795,4198 | 14,82 |          | 0 | 1 | 4712  | 150211-Fr_I_Helo-red-alk-tryp-001.raw | 5  | 5  | JAG85190.1                                                                                                              | Carbamidomethylation                                                             | C15:Carbamidomethylation:1000.00                                                                                                                                        |
| <b>GS(+59.02)SGYC(+57.02)AWPA<br/>C(+57.02)YC(+57.02)YGLPDSVK</b>         | 51,93 | 2456,006 | 21 | 2,7  | 819,6781 | 43,95 |          | 0 | 1 | 15088 | 150211-Fr_I_Helo-red-alk-tryp-001.raw | 3  | 3  | AAC25688.1:O77463.1:AA25689.1                                                                                           | Aminoethylcysteine; Carbamidomethylation                                         | S2:Aminoethylcysteine:0.00;C6:Carbamidomethylation:1000.00;C11:Carbamidomethylation:1000.00;C13:Carbamidomethylation:1000.00                                            |
| <b>FS(+58.03)C(+57.02)FIRPAGFC<br/>+57.02)DGYC(+57.02)K</b>               | 51,5  | 2041,872 | 16 | -0,9 | 681,6307 | 37,5  |          | 0 | 1 | 12749 | 150211-Fr_I_Helo-red-alk-tryp-001.raw | 6  | 6  | JAW07016.1:JAW06979.1:P68411.1:1913435A:P68410.1:AA B36322.1                                                            | 2 3-dihydro-2 2-dimethyl-7-benzofuranol N-methyl carbamate; Carbamidomethylation | S2:2 3-dihydro-2 2-dimethyl-7-benzofuranol N-methyl carbamate:1000.00;C3:Carbamidomethylation:1000.00;C11:Carbamidomethylation:1000.00;C15:Carbamidomethylation:1000.00 |
| <b>LTSQ(+.98)SEYAC(+57.02)PAIE<br/>K(+43.01)FC(+57.02)EDHC(+57.02)AAK</b> | 51,45 | 2758,167 | 23 | 5,1  | 920,401  | 32,48 |          | 0 | 1 | 10927 | 150211-Fr_I_Helo-red-alk-tryp-001.raw | 1  | 1  | ABV64385.1:ABE98262.1:QOGY45.1                                                                                          | Deamidation (NQ); Carbamidomethylation; Carbamylation                            | Q4:Deamidation (NQ):1000.00;C9:Carbamidomethylation:1000.00;K14:Carbamidomethylation:1000.00;C20:Carbamidomethylation:1000.00                                           |
| <b>ADVDFGTGIADSIK(+114.04)</b>                                            | 51,38 | 1577,794 | 14 | 0,1  | 789,9042 | 38,06 |          | 0 | 1 | 12959 | 150211-Fr_I_Helo-red-alk-tryp-001.raw | 1  | 1  | JAW07002.1:P86824.1                                                                                                     | Ubiquitin                                                                        | K14:Ubiquitin:22.45                                                                                                                                                     |
| <b>C(+57.02)SATYPGLC(+57.02)K</b>                                         | 51,35 | 1155,505 | 10 | -0,3 | 578,7597 | 25,51 |          | 0 | 1 | 8624  | 150211-Fr_I_Helo-red-alk-tryp-001.raw | 98 | 98 | JAW07031.1:JAW06995.1                                                                                                   | Carbamidomethylation                                                             | C1:Carbamidomethylation:1000.00;C9:Carbamidomethylation:1000.00                                                                                                         |
| <b>KLGLQDDGTVAAYNT(+59.02)A<br/>GISLGSVC(+57.02)K</b>                     | 51,32 | 2711,326 | 26 | 2,7  | 904,785  | 35,83 |          | 0 | 1 | 12136 | 150211-Fr_I_Helo-red-alk-tryp-001.raw | 1  | 1  | AIJ02110.2:JAG85213.1                                                                                                   | Aminoethylcysteine; Carbamidomethylation                                         | T15:Aminoethylcysteine:17.91;C25:Carbamidomethylation:1000.00                                                                                                           |
| <b>AEID(+15.99)FSGIPEDIK</b>                                              | 51,2  | 1561,788 | 14 | 1,1  | 781,9019 | 36,58 | 1,22E+09 | 1 | 1 | 12408 | 150211-Fr_I_Helo-red-alk-tryp-001.raw | 20 | 20 | JAW06987.1:JAW07038.1:JAW06992.1:P84190.1                                                                               | Oxidation or Hydroxylation                                                       | D4:Oxidation or Hydroxylation:29.24                                                                                                                                     |
| <b>KEGYAMDHEGC(+57.02)K</b>                                               | 51,13 | 1423,586 | 12 | -0,1 | 712,8002 | 5,69  | 3,25E+06 | 1 | 1 | 1417  | 150211-Fr_I_Helo-red-alk-tryp-001.raw | 7  | 7  | JAW07016.1:JAW06979.1:P68411.1:1913435A:P68410.1:AA B36322.1:AAW72453.1:Q5G8B8.1:COJM9.1:JAG85185.1:CEF39517.1:P60276.1 | Carbamidomethylation                                                             | C11:Carbamidomethylation:1000.00                                                                                                                                        |
| <b>GS(+58.03)SGYC(+57.02)AWPA<br/>C(+57.02)YC(+57.02)YGLPNWV<br/>K</b>    | 50,99 | 2553,079 | 21 | -3,7 | 852,0304 | 48,9  |          | 0 | 1 | 16814 | 150211-Fr_I_Helo-red-alk-tryp-001.raw | 1  | 1  | AAW72453.1:Q5G8B8.1:AAB29128.1:P56612.1:AIA81145.1:CAA46982.1:P15226.2:PODMM8.1:INPI:1                                  | 2 3-dihydro-2 2-dimethyl-7-benzofuranol N-methyl carbamate; Carbamidomethylation | S2:2 3-dihydro-2 2-dimethyl-7-benzofuranol N-methyl carbamate:0.00;C6:Carbamidomethylation:1000.00;C11:Carbamidomethylation:1000.00;C1                                  |



|                                                                       |       |          |    |      |          |       |          |   |       |                                           |   |                                                                           |                                                                                            |                                                                                                                                                                                             |
|-----------------------------------------------------------------------|-------|----------|----|------|----------|-------|----------|---|-------|-------------------------------------------|---|---------------------------------------------------------------------------|--------------------------------------------------------------------------------------------|---------------------------------------------------------------------------------------------------------------------------------------------------------------------------------------------|
|                                                                       |       |          |    |      |          |       |          |   |       |                                           |   | B7D:AAB36321.1:AA<br>B36318.1:P56611.1:J<br>AG85191.1:JAG8521<br>0.1      |                                                                                            | 3:Carbamidomethylation:1000<br>.00                                                                                                                                                          |
| <b>F(+43.01)SC(+57.02)FIR(+14.02)<br/>)PAGFC(+57.02)DGYC(+57.02)K</b> | 50,81 | 2040,864 | 16 | -0,2 | 1021,439 | 36,11 | 4,11E+09 | 1 | 12234 | 150211-Fr_I_Helo-red-<br>alk-tryp-001.raw | 5 | 5 JAW07016.1:JAW06<br>979.1:P68411.1:191<br>3435A:P68410.1:AA<br>B36322.1 | Carbamylation;<br>Carbamidomethylation;<br>Methylation(KR)                                 | F1:Carbamylation:170.25;C3:C<br>arbamidomethylation:1000.00<br>;R6:Methylation(KR):228.69;C<br>11:Carbamidomethylation:100<br>0.00;C15:Carbamidomethylati<br>on:1000.00                     |
| <b>ADIIMLLTGR</b>                                                     | 50,76 | 1101,622 | 10 | 0,2  | 551,8182 | 36,06 | 0        | 1 | 12218 | 150211-Fr_I_Helo-red-<br>alk-tryp-001.raw | 7 | 7 AMO02558.1:JAW07025.1:JAW06984.1                                        |                                                                                            |                                                                                                                                                                                             |
| <b>ADIIMLITGR</b>                                                     | 50,76 | 1101,622 | 10 | 0,2  | 551,8182 | 36,06 | 0        | 1 | 12218 | 150211-Fr_I_Helo-red-<br>alk-tryp-001.raw | 7 | 7                                                                         |                                                                                            |                                                                                                                                                                                             |
| <b>S(+58.03)GINYLVLQVHYADVTR</b>                                      | 50,73 | 2005,051 | 17 | -2,3 | 669,356  | 37    | 0        | 1 | 12567 | 150211-Fr_I_Helo-red-<br>alk-tryp-001.raw | 3 | 3 XP_023239442.1                                                          | 2 3-dihydro-2 2-<br>dimethyl-7-benzofuranol<br>N-methyl carbamate                          | S1:2 3-dihydro-2 2-dimethyl-7-<br>benzofuranol N-methyl<br>carbamate:1000.00                                                                                                                |
| <b>AS(+58.03)SGYC(+57.02)AWPA<br/>C(+57.02)YC(+57.02)YGVDPDIK</b>     | 50,58 | 2519,058 | 21 | -2,3 | 1260,533 | 37    | 0        | 1 | 12565 | 150211-Fr_I_Helo-red-<br>alk-tryp-001.raw | 6 | 6 JAW07016.1:JAW06<br>979.1:P68411.1:191<br>3435A:P68410.1:AA<br>B36322.1 | 2 3-dihydro-2 2-<br>dimethyl-7-benzofuranol<br>N-methyl carbamate;<br>Carbamidomethylation | S2:2 3-dihydro-2 2-dimethyl-7-<br>benzofuranol N-methyl<br>carbamate:0.00;C6:Carbamido<br>methylation:1000.00;C11:Carba<br>midomethylation:1000.00;C1<br>3:Carbamidomethylation:1000<br>.00 |
| <b>AEIDFSGIPE(+21.98)DII</b>                                          | 50,55 | 1439,68  | 13 | -1   | 720,8463 | 47,03 | 0        | 1 | 16175 | 150211-Fr_I_Helo-red-<br>alk-tryp-001.raw | 1 | 1 JAW06987.1:JAW07<br>038.1:JAW06992.1:P<br>84190.1                       | Sodium adduct                                                                              | E10:Sodium adduct:14.02                                                                                                                                                                     |
| <b>TQFGC(+57.02)PAYEGYC(+57.0<br/>2)NNHC(+57.02)QD(+43.99)IER</b>     | 50,51 | 2662,027 | 21 | -0,4 | 888,3492 | 17,15 | 0        | 1 | 5575  | 150211-Fr_I_Helo-red-<br>alk-tryp-001.raw | 1 | 1 Q5G8A6.1:JAG85216<br>.1:AAW72464.1:AA<br>W72465.1                       | Carbamidomethylation;<br>Carboxylation (DKW)                                               | C5:Carbamidomethylation:100<br>0.00;C12:Carbamidomethylati<br>on:1000.00;C16:Carbamidome<br>thylation:1000.00;D18:Carbox<br>ylation (DKW):1000.00                                           |
| <b>LS(+59.02)SAANMMQMEWDD<br/>ELAAVAQAHANQC(+57.02)K</b>              | 50,47 | 3178,376 | 28 | 0    | 795,6013 | 43,24 | 0        | 1 | 14832 | 150211-Fr_I_Helo-red-<br>alk-tryp-001.raw | 2 | 2 JAW07031.1:JAW06<br>995.1                                               | Aminoethylcysteine;<br>Carbamidomethylation                                                | S2:Aminoethylcysteine:0.00;C<br>27:Carbamidomethylation:100<br>0.00                                                                                                                         |
| <b>I(+58.01)TC(+57.02)FLTAAGYC<br/>(+57.02)NTEC(+57.02)TLKK</b>       | 50,42 | 2308,054 | 19 | 4,5  | 770,3619 | 34,76 | 0        | 1 | 11751 | 150211-Fr_I_Helo-red-<br>alk-tryp-001.raw | 2 | 2 AAC25688.1:O77463<br>.1:AA25689.1                                       | Carboxymethyl (KW<br>X@N-term);<br>Carbamidomethylation                                    | I1:Carboxymethyl (KW X@N-<br>term):137.15;C3:Carbamidom<br>ethylation:1000.00;C11:Carba<br>midomethylation:1000.00;C15<br>:Carbamidomethylation:1000.<br>00                                 |
| <b>GS(+58.03)GINYLVLQVHYADVT<br/>R</b>                                | 50,37 | 2062,072 | 18 | -1,3 | 688,3637 | 37,03 | 0        | 1 | 12578 | 150211-Fr_I_Helo-red-<br>alk-tryp-001.raw | 2 | 2 XP_023239442.1                                                          | 2 3-dihydro-2 2-<br>dimethyl-7-benzofuranol<br>N-methyl carbamate                          | S2:2 3-dihydro-2 2-dimethyl-7-<br>benzofuranol N-methyl<br>carbamate:1000.00                                                                                                                |
| <b>SSLLFLTPIFVK</b>                                                   | 50,16 | 1363,812 | 12 | -0,1 | 682,913  | 50,22 | 0        | 1 | 17266 | 150211-Fr_I_Helo-red-<br>alk-tryp-001.raw | 3 | 3 JAW07036.1                                                              |                                                                                            |                                                                                                                                                                                             |
| <b>KYFFTLQASC(+57.02)LR</b>                                           | 50,12 | 1629,834 | 13 | 0,2  | 544,2853 | 36,08 | 0        | 1 | 12226 | 150211-Fr_I_Helo-red-<br>alk-tryp-001.raw | 1 | 1 JAW07039.1                                                              | Carbamidomethylation                                                                       | C11:Carbamidomethylation:10<br>00.00                                                                                                                                                        |

J Venom Anim Toxins incl Trop Dis, 2019

|                                                                                         |       |          |    |      |          |       |          |   |       |                                       |     |     |                                                                                                                                                              |                                                                                                  |                                                                                                                                                                                                                                            |
|-----------------------------------------------------------------------------------------|-------|----------|----|------|----------|-------|----------|---|-------|---------------------------------------|-----|-----|--------------------------------------------------------------------------------------------------------------------------------------------------------------|--------------------------------------------------------------------------------------------------|--------------------------------------------------------------------------------------------------------------------------------------------------------------------------------------------------------------------------------------------|
| <b>APEAAPEAAPEAAAAPE</b>                                                                | 50,01 | 1658,779 | 18 | -0,5 | 830,3962 | 19,26 | 5,28E+08 | 1 | 6381  | 150211-Fr_I_Helo-red-alk-tryp-001.raw | 68  | 68  | JAW07022.1:P86821.1                                                                                                                                          |                                                                                                  |                                                                                                                                                                                                                                            |
| <b>ETRPITSWHTIGILM(+15.99)RW<br/>DK(+42.02)ELQISYVFK</b>                                | 49,97 | 3504,834 | 28 | 2,5  | 701,9758 | 48,27 | 0        | 1 | 16600 | 150211-Fr_I_Helo-red-alk-tryp-001.raw | 1   | 1   | JAW07031.1:JAW06995.1                                                                                                                                        | Oxidation (M);<br>Guanidination                                                                  | M15:Oxidation<br>(M):1000.00;K19:Guanidination:<br>77.76                                                                                                                                                                                   |
| <b>AEIDFS(+79.96)GIPEDIK</b>                                                            | 49,77 | 1625,749 | 14 | -1,7 | 813,8806 | 45,24 | 0        | 1 | 15545 | 150211-Fr_I_Helo-red-alk-tryp-001.raw | 1   | 1   | JAW06987.1:JAW07038.1:JAW06992.1:P84190.1                                                                                                                    | Sulfation                                                                                        | S6:Sulfation:1000.00                                                                                                                                                                                                                       |
| <b>EALAPEPAPEP</b>                                                                      | 49,56 | 1119,545 | 11 | -0,6 | 560,7793 | 15,53 | 1,20E+09 | 1 | 4970  | 150211-Fr_I_Helo-red-alk-tryp-001.raw | 126 | 126 | JAW07022.1:P86821.1                                                                                                                                          |                                                                                                  |                                                                                                                                                                                                                                            |
| <b>WDKELQISYVFK</b>                                                                     | 49,52 | 1554,808 | 12 | -0,6 | 778,4109 | 36,04 | 0        | 1 | 12209 | 150211-Fr_I_Helo-red-alk-tryp-001.raw | 1   | 1   | JAW07031.1:JAW06995.1                                                                                                                                        |                                                                                                  |                                                                                                                                                                                                                                            |
| <b>ITAVEIPDPFWVDAIR</b>                                                                 | 49,42 | 1840,972 | 16 | 0,8  | 921,4941 | 52,38 | 0        | 1 | 17983 | 150211-Fr_I_Helo-red-alk-tryp-001.raw | 1   | 1   | JAW06991.1:JAW07032.1:JAG85159.1                                                                                                                             |                                                                                                  |                                                                                                                                                                                                                                            |
| <b>KLGELODDGTVAYN(+.98)TAGIS<br/>LGSVC(+57.02)K(+21.98)</b>                             | 49,38 | 2675,273 | 26 | 4,9  | 892,7691 | 35,91 | 0        | 1 | 12163 | 150211-Fr_I_Helo-red-alk-tryp-001.raw | 1   | 1   | AIJ02110.2:JAG85213.1                                                                                                                                        | Deamidation (NQ);<br>Carbamidomethylation;<br>Sodium adduct                                      | N14:Deamidation<br>(NQ):0.00;C25:Carbamidomethyl-<br>ylation:1000.00;K26:Sodium<br>adduct:0.00                                                                                                                                             |
| <b>E(+41.03)GYPADSKGC(+57.02)<br/>KITC(+57.02)FLTAAGYC(+57.02)<br/>NTEC(+57.02)TLKK</b> | 49,24 | 3483,593 | 30 | -4,4 | 871,9017 | 36,89 | 0        | 1 | 12526 | 150211-Fr_I_Helo-red-alk-tryp-001.raw | 1   | 1   | AAC25688.1:O774631: AAC25689.1                                                                                                                               | Amidation of lysines or<br>N-terminal amines with<br>methyl acetimidate;<br>Carbamidomethylation | E1:Amidation of lysines or N-<br>terminal amines with methyl<br>acetimidate:8.82;C10:Carbami-<br>domethylation:1000.00;C14:C<br>arbamidomethylation:1000.00<br>;C22:Carbamidomethylation:1<br>000.00;C26:Carbamidomethyl-<br>ation:1000.00 |
| <b>KGSSGYC(+57.02)AWPAC(+57.<br/>02)YC(+57.02)YGLPD</b>                                 | 49,17 | 2210,886 | 19 | 0,2  | 1106,45  | 38,98 | 0        | 1 | 13290 | 150211-Fr_I_Helo-red-alk-tryp-001.raw | 1   | 1   | AAC25688.1:O774631: AAC25689.1                                                                                                                               | Carbamidomethylation                                                                             | C7:Carbamidomethylation:100<br>0.00;C12:Carbamidomethylati-<br>on:1000.00;C14:Carbamidome-<br>thylation:1000.00                                                                                                                            |
| <b>EALAPEPAPEPAPE(+37.95)PAP<br/>EA</b>                                                 | 49,07 | 1919,846 | 19 | -1,7 | 640,955  | 35,08 | 0        | 1 | 11863 | 150211-Fr_I_Helo-red-alk-tryp-001.raw | 1   | 1   | JAW07022.1:P86821.1                                                                                                                                          | Replacement of 2<br>protons by calcium                                                           | E14:Replacement of 2 protons<br>by calcium:16.51                                                                                                                                                                                           |
| <b>AEIDFSGIPEDIKQIKETNAKPPA</b>                                                         | 48,98 | 2723,438 | 25 | 0,3  | 681,867  | 48,7  | 4,93E+08 | 1 | 16745 | 150211-Fr_I_Helo-red-alk-tryp-001.raw | 1   | 1   | JAW06987.1:JAW07038.1:JAW06992.1                                                                                                                             |                                                                                                  |                                                                                                                                                                                                                                            |
| <b>FSTC(+57.02)SVENIK</b>                                                               | 48,7  | 1183,554 | 10 | -0,2 | 592,7843 | 30,02 | 0        | 1 | 10078 | 150211-Fr_I_Helo-red-alk-tryp-001.raw | 20  | 20  | AMO02558.1:JAW07025.1:JAW06984.1                                                                                                                             | Carbamidomethylation                                                                             | C4:Carbamidomethylation:100<br>0.00                                                                                                                                                                                                        |
| <b>AIIT(+59.02)VVDNGIMIGC(+57.<br/>02)GIFDVASPSVK</b>                                   | 48,7  | 2634,358 | 25 | 1,1  | 879,1277 | 49,29 | 0        | 1 | 16949 | 150211-Fr_I_Helo-red-alk-tryp-001.raw | 1   | 1   | JAW07019.1:JAW06978.1                                                                                                                                        | Aminoethylcysteine;<br>Carbamidomethylation                                                      | T4:Aminoethylcysteine:88.40;<br>C14:Carbamidomethylation:10<br>00.00                                                                                                                                                                       |
| <b>YC(+57.02)YGLPNWVK</b>                                                               | 48,69 | 1298,612 | 10 | -1   | 650,3126 | 33,91 | 0        | 1 | 11445 | 150211-Fr_I_Helo-red-alk-tryp-001.raw | 4   | 4   | AAW72453.1:Q5G8B8.1: AAB29128.1: P56612.1: AIA81145.1: CAA46982.1: P15226.2: PODMM8.1: INPI:1 B7D: AAB36321.1: AA B36318.1: P56611.1: JAG85191.1: JAG85210.1 | Carbamidomethylation                                                                             | C2:Carbamidomethylation:100<br>0.00                                                                                                                                                                                                        |

J Venom Anim Toxins incl Trop Dis, 2019

|                                                                 |       |          |    |      |          |       |          |   |       |                                       |    |    |                                                                                                     |                                                                                                                                                                                                                                   |
|-----------------------------------------------------------------|-------|----------|----|------|----------|-------|----------|---|-------|---------------------------------------|----|----|-----------------------------------------------------------------------------------------------------|-----------------------------------------------------------------------------------------------------------------------------------------------------------------------------------------------------------------------------------|
| E(sub Q)NEPSFIEDSAIPGHQVLDLPVD LVK                              | 48,67 | 2875,424 | 26 | 5,5  | 959,4872 | 48,86 | 0        | 1 | 16798 | 150211-Fr_I_Helo-red-alk-tryp-001.raw | 6  | 6  | AIJ02110.2                                                                                          |                                                                                                                                                                                                                                   |
| DVTMTGSRPFITTQK                                                 | 48,66 | 1567,767 | 14 | 0,1  | 523,5961 | 30,34 | 0        | 1 | 10185 | 150211-Fr_I_Helo-red-alk-tryp-001.raw | 6  | 6  | JAW07031.1:JAW06995.1                                                                               |                                                                                                                                                                                                                                   |
| TQ(+.98)FGC(+57.02)PAYEGYC(+57.02)NDHC(+57.02)N(+.98)DIER(-.98) | 48,57 | 2605,99  | 21 | 4,9  | 869,6748 | 26,57 | 0        | 1 | 8963  | 150211-Fr_I_Helo-red-alk-tryp-001.raw | 1  | 1  | POC2F3.1:P69940.2                                                                                   | Deamidation (NQ); Carbamidomethylation; Amidation<br>Q2:Deamidation (NQ):98.13;C5:Carbamidomethylation:1000.00;C12:Carbamidomethylation:1000.00;C16:Carbamidomethylation:1000.00;N17:Deamidation (NQ):61.69;R21:Amidation:1000.00 |
| LSC(+57.02)FIRPSGYC(+57.02)GR                                   | 48,46 | 1571,734 | 13 | -0,3 | 524,9183 | 31,38 | 0        | 1 | 10540 | 150211-Fr_I_Helo-red-alk-tryp-001.raw | 1  | 1  | AAW72453.1:Q5G8B8.1:AAB29128.1:P5612.1:AIA81145.1:CAA46982.1:P15226.2:PODMM8.1:1NPI:1B7D:AAB36321.1 | C3:Carbamidomethylation:1000.00;C11:Carbamidomethylation:1000.00                                                                                                                                                                  |
| GGLC(+57.02)AFLIGR                                              | 48,46 | 1062,565 | 10 | 0,2  | 532,2896 | 31,56 | 0        | 1 | 10602 | 150211-Fr_I_Helo-red-alk-tryp-001.raw | 45 | 45 | JAW07031.1:JAW06995.1                                                                               | C4:Carbamidomethylation:1000.00                                                                                                                                                                                                   |
| IFDIADIELPITTNFFR                                               | 48,32 | 2024,062 | 17 | -0,6 | 1013,038 | 58,23 | 0        | 1 | 19899 | 150211-Fr_I_Helo-red-alk-tryp-001.raw | 3  | 3  | JAW07023.1                                                                                          |                                                                                                                                                                                                                                   |
| EAAPEAAPEPAAAAPE                                                | 48,26 | 1490,689 | 16 | -0,4 | 746,3514 | 31,33 | 0        | 1 | 10523 | 150211-Fr_I_Helo-red-alk-tryp-001.raw | 6  | 6  | JAW07022.1:P86821.1                                                                                 |                                                                                                                                                                                                                                   |
| V(+43.01)TESDK(+14.02)QTILET HNQLR                              | 48,25 | 2068,055 | 17 | 0,2  | 518,0211 | 30,18 | 0        | 1 | 10131 | 150211-Fr_I_Helo-red-alk-tryp-001.raw | 3  | 3  | JAW07031.1:JAW06995.1                                                                               | Carbamylation; Methylation(KR)<br>V1:Carbamylation:1000.00;K6: Methylation(KR):88.86                                                                                                                                              |
| FSC(+57.02)FIRPAGF                                              | 48,24 | 1200,575 | 10 | 0,1  | 601,2948 | 33,41 | 0        | 1 | 11260 | 150211-Fr_I_Helo-red-alk-tryp-001.raw | 13 | 13 | JAW07016.1:JAW06979.1:P68411.1:1913435A:P68410.1:AA B36322.1                                        | C3:Carbamidomethylation:1000.00                                                                                                                                                                                                   |
| ITC(+57.02)FLTAAGYC(+57.02)NTE(+17.03)C(+57.02)TLK              | 48,19 | 2138,98  | 18 | -1,6 | 713,9995 | 35,79 | 0        | 1 | 12121 | 150211-Fr_I_Helo-red-alk-tryp-001.raw | 1  | 1  | AAC25688.1:O77463.1:AAC25689.1                                                                      | Carbamidomethylation; Replacement of proton with ammonium ion<br>C3:Carbamidomethylation:1000.00;C11:Carbamidomethylation:1000.00;E14:Replacement of proton with ammonium ion:31.27;C15:Carbamidomethylation:1000.00              |
| FGPNVAGETAASEVNFHFSAPHLIFPE                                     | 48,1  | 2884,382 | 27 | -1,3 | 962,4667 | 52,41 | 2,82E+08 | 1 | 17993 | 150211-Fr_I_Helo-red-alk-tryp-001.raw | 3  | 3  | JAW07031.1:JAW06995.1                                                                               |                                                                                                                                                                                                                                   |
| KKQNEPS(+58.03)FIEDSAIPGHQQVLDLPVDLVK                           | 48,1  | 3188,659 | 28 | -1,2 | 798,1711 | 37,85 | 0        | 1 | 12881 | 150211-Fr_I_Helo-red-alk-tryp-001.raw | 1  | 1  | AIJ02110.2                                                                                          | 2 3-dihydro-2 2-dimethyl-7-benzofuranol N-methyl carbamate<br>S7:2 3-dihydro-2 2-dimethyl-7-benzofuranol N-methyl carbamate:39.44                                                                                                 |
| IDFSGIPE(+21.98)DIK                                             | 47,94 | 1367,695 | 12 | 1,1  | 684,8554 | 37,77 | 0        | 1 | 12847 | 150211-Fr_I_Helo-red-alk-tryp-001.raw | 1  | 1  | JAW06987.1:JAW07038.1:JAW06992.1:P84190.1                                                           | Sodium adduct<br>E8:Sodium adduct:12.28                                                                                                                                                                                           |
| S(+58.03)SGYC(+57.02)AWPAC(+57.02)YC(+57.02)YGLPNWVK            | 47,94 | 2496,058 | 20 | -1,7 | 1249,034 | 48,84 | 0        | 1 | 16792 | 150211-Fr_I_Helo-red-alk-tryp-001.raw | 1  | 1  | AAW72453.1:Q5G8B8.1:AAB29128.1:P5612.1:AIA81145.1:CAA46982.1:P15226.                                | 2 3-dihydro-2 2-dimethyl-7-benzofuranol N-methyl carbamate; Carbamidomethylation<br>S1:2 3-dihydro-2 2-dimethyl-7-benzofuranol N-methyl carbamate:0.00;C5:Carbamidomethylation:1000.00;C10:Carb                                   |

|                                                                                |       |          |    |      |          |       |          |   |       |                                           |    |    |                                                                                           |                                              |                                                                                                                                               |
|--------------------------------------------------------------------------------|-------|----------|----|------|----------|-------|----------|---|-------|-------------------------------------------|----|----|-------------------------------------------------------------------------------------------|----------------------------------------------|-----------------------------------------------------------------------------------------------------------------------------------------------|
|                                                                                |       |          |    |      |          |       |          |   |       |                                           |    |    | 2:PODMM8.1:1NPI:1<br>B7D:AAB36321.1:AA<br>B36318.1:P56611.1:J<br>AG85191.1:JAG8521<br>0.1 |                                              | amidomethylation:1000.00;C1<br>2:Carbamidomethylation:1000<br>.00                                                                             |
| <b>FEHDSGDQR</b>                                                               | 47,9  | 1089,448 | 9  | 0,4  | 545,7313 | 5,56  | 0        | 1 | 1377  | 150211-Fr_I_Helo-red-<br>alk-tryp-001.raw | 23 | 23 | JAW07031.1:JAW06995.1:JAG85161.1                                                          |                                              |                                                                                                                                               |
| <b>EALAPE(+21.98)PAPEP</b>                                                     | 47,87 | 1141,527 | 11 | -0,6 | 571,7703 | 31,88 | 0        | 1 | 10715 | 150211-Fr_I_Helo-red-<br>alk-tryp-001.raw | 8  | 8  | JAW07022.1:P86821                                                                         | Sodium adduct                                | E6:Sodium adduct:69.81                                                                                                                        |
| <b>AEIDF(+31.99)SGIPEDIK</b>                                                   | 47,84 | 1577,782 | 14 | -0,4 | 789,8981 | 56,7  | 0        | 1 | 19401 | 150211-Fr_I_Helo-red-<br>alk-tryp-001.raw | 1  | 1  | JAW06987.1:JAW07<br>038.1:JAW06992.1:P<br>84190.1                                         | Dihydroxy                                    | F5:Dihydroxy:42.68                                                                                                                            |
| <b>AEIDFSGIPEDIK(+14.02)QIK(+4<br/>3.01)</b>                                   | 47,82 | 1972,052 | 17 | 1,4  | 658,3588 | 47,26 | 7,40E+08 | 1 | 16254 | 150211-Fr_I_Helo-red-<br>alk-tryp-001.raw | 7  | 7  | JAW06987.1:JAW07<br>038.1:JAW06992.1                                                      | Methylation(KR);<br>Carbamylation            | K14:Methylation(KR):0.00;K17:<br>Carbamylation:0.00                                                                                           |
| <b>AQVIGITPFK</b>                                                              | 47,78 | 1072,628 | 10 | 2,3  | 537,3225 | 32,93 | 0        | 1 | 11087 | 150211-Fr_I_Helo-red-<br>alk-tryp-001.raw | 2  | 2  | AIJ02110.2:JAG85213.1                                                                     |                                              |                                                                                                                                               |
| <b>EALAPEPAPEAPE(+17.03)PAP<br/>EA</b>                                         | 47,77 | 1898,926 | 19 | -0,8 | 950,4695 | 21,04 | 3,43E+09 | 1 | 7049  | 150211-Fr_I_Helo-red-<br>alk-tryp-001.raw | 45 | 45 | JAW07022.1:P86821<br>.1                                                                   | Replacement of proton<br>with ammonium ion   | E14:Replacement of proton<br>with ammonium ion:9.95                                                                                           |
| <b>VDTVVAHETAHLIGAPH(+72.02)D<br/>GEGPEETGLSGSPGAK</b>                         | 47,62 | 3307,559 | 33 | 4,9  | 662,5223 | 18    | 0        | 1 | 5901  | 150211-Fr_I_Helo-red-<br>alk-tryp-001.raw | 1  | 1  | JAG85213.1                                                                                | Ethoxyformylation                            | H16:Ethoxyformylation:41.57                                                                                                                   |
| <b>LS(+60.00)SAANMMQMEWDD<br/>ELAAVAQAHANQC(+57.02)K</b>                       | 47,5  | 3179,36  | 28 | 3,6  | 1060,798 | 43,27 | 0        | 1 | 14844 | 150211-Fr_I_Helo-red-<br>alk-tryp-001.raw | 1  | 1  | JAW07031.1:JAW06<br>995.1                                                                 | 2-OH-ethyl thio-Ser;<br>Carbamidomethylation | S2:2-OH-ethyl thio-<br>Ser:0.00;C27:Carbamidomethy<br>lation:1000.00                                                                          |
| <b>APEAAPEAAPE(+37.96)PAAAA<br/>PE</b>                                         | 47,46 | 1696,735 | 18 | -2,2 | 849,3727 | 32,03 | 0        | 1 | 10769 | 150211-Fr_I_Helo-red-<br>alk-tryp-001.raw | 1  | 1  | JAW07022.1:P86821<br>.1                                                                   | Replacement of proton<br>by potassium        | E11:Replacement of proton by<br>potassium:52.34                                                                                               |
| <b>AEIDFSGIP(-30.01)EDIK</b>                                                   | 47,41 | 1515,782 | 14 | 0,3  | 758,8985 | 38,2  | 0        | 1 | 13011 | 150211-Fr_I_Helo-red-<br>alk-tryp-001.raw | 7  | 7  | JAW06987.1:JAW07<br>038.1:JAW06992.1:P<br>84190.1                                         | Proline oxidation to<br>pyrrolidinone        | P9:Proline oxidation to<br>pyrrolidinone:1000.00                                                                                              |
| <b>AEIDFSGIPED(+37.96)IHKQ</b>                                                 | 47,22 | 1711,807 | 15 | -3,3 | 856,908  | 42,68 | 0        | 1 | 14632 | 150211-Fr_I_Helo-red-<br>alk-tryp-001.raw | 1  | 1  | JAW06987.1:JAW07<br>038.1:JAW06992.1                                                      | Replacement of proton<br>by potassium        | D11:Replacement of proton by<br>potassium:0.00                                                                                                |
| <b>GSSGYC(+57.02)AWPAC(+57.0<br/>2)YC(+57.02)YGLPDS(+59.02)V<br/>KIWTSETNK</b> | 47,09 | 3415,477 | 29 | 1,6  | 1139,502 | 49,38 | 0        | 1 | 16981 | 150211-Fr_I_Helo-red-<br>alk-tryp-001.raw | 1  | 1  | AAC25688.1:O77463<br>.1:AAC25689.1                                                        | Carbamidomethylation;<br>Aminoethylcysteine  | C6:Carbamidomethylation:100<br>0.00;C11:Carbamidomethylati<br>on:1000.00;C13:Carbamidome<br>thylation:1000.00;S19:Amino<br>ethylcysteine:7.64 |
| <b>A(+119.04)EIDFSGIPEDIK</b>                                                  | 46,81 | 1664,83  | 14 | -2,7 | 833,4199 | 45,36 | 0        | 1 | 15589 | 150211-Fr_I_Helo-red-<br>alk-tryp-001.raw | 3  | 3  | JAW06987.1:JAW07<br>038.1:JAW06992.1:P<br>84190.1                                         | Pyridylacetyl                                | A1:Pyridylacetyl:93.42                                                                                                                        |
| <b>AEIDFS(+136.03)GIPEDIK</b>                                                  | 46,8  | 1681,822 | 14 | -0,7 | 841,9175 | 46,16 | 0        | 1 | 15870 | 150211-Fr_I_Helo-red-<br>alk-tryp-001.raw | 2  | 2  | JAW06987.1:JAW07<br>038.1:JAW06992.1:P<br>84190.1                                         | O-<br>Diethylphosphorylation                 | S6:O-<br>Diethylphosphorylation:142.2<br>7                                                                                                    |
| <b>MGDPREDGT(+59.02)VDINTAG<br/>IANSAGVC(+57.02)KPC(+57.02)<br/>FK</b>         | 46,79 | 3138,436 | 29 | 1,2  | 785,6171 | 35,87 | 0        | 1 | 12148 | 150211-Fr_I_Helo-red-<br>alk-tryp-001.raw | 1  | 1  | AIJ02109.2:P86392.<br>3:V9Z9A3.1:AHE405<br>89.1:AHE40588.1                                | Aminoethylcysteine;<br>Carbamidomethylation  | T9:Aminoethylcysteine:39.44;<br>C24:Carbamidomethylation:10<br>00.00;C27:Carbamidomethylat<br>ion:1000.00                                     |
| <b>RAEIDFSGIPEDIK</b>                                                          | 46,72 | 1701,894 | 15 | -0,5 | 568,3049 | 36,77 | 0        | 1 | 12479 | 150211-Fr_I_Helo-red-<br>alk-tryp-001.raw | 2  | 2  | JAW06987.1:JAW07038.1:JAW06992.1                                                          |                                              |                                                                                                                                               |

J Venom Anim Toxins incl Trop Dis, 2019

|                                                               |       |          |    |      |          |       |          |   |       |                                       |    |    |                                                              |                                                                                  |                                                                                                                                                                       |
|---------------------------------------------------------------|-------|----------|----|------|----------|-------|----------|---|-------|---------------------------------------|----|----|--------------------------------------------------------------|----------------------------------------------------------------------------------|-----------------------------------------------------------------------------------------------------------------------------------------------------------------------|
| <b>PAGFC(+57.02)DGYC(+57.02)K</b>                             | 46,48 | 1173,458 | 10 | -0,5 | 587,7361 | 25,52 | 0        | 1 | 8627  | 150211-Fr_I_Helo-red-alk-tryp-001.raw | 8  | 8  | JAW07016.1:JAW06979.1:P68411.1:1913435A:P68410.1:AA B36322.1 | Carbamidomethylation                                                             | C5:Carbamidomethylation:1000.00;C9:Carbamidomethylation:1000.00                                                                                                       |
| <b>KTQFGC(+57.02)PAYEGYC(+57.02)N(+.98)DHC(+57.02)NDIERK</b>  | 46,38 | 2862,179 | 23 | 4,7  | 573,4459 | 31,33 | 0        | 1 | 10524 | 150211-Fr_I_Helo-red-alk-tryp-001.raw | 1  | 1  | P0C2F3.1:P69940.2                                            | Carbamidomethylation; Deamidation (NQ)                                           | C6:Carbamidomethylation:1000.00;C13:Carbamidomethylation:1000.00;N14:Deamidation (NQ):31.56;C17:Carbamidomethylation:1000.00                                          |
| <b>YFFTLQASC(+57.02)LREDC(+57.02)PN(+.98)SG</b>               | 46,33 | 2261,972 | 19 | 0,8  | 1131,994 | 43,31 | 0        | 1 | 14858 | 150211-Fr_I_Helo-red-alk-tryp-001.raw | 1  | 1  | JAW07039.1                                                   | Carbamidomethylation; Deamidation (NQ)                                           | C10:Carbamidomethylation:1000.00;C15:Carbamidomethylation:1000.00;N17:Deamidation (NQ):55.44                                                                          |
| <b>LTS(+58.03)QSEYAC(+57.02)PAIDKFC(+57.02)EDHC(+57.02)AA</b> | 46,3  | 2630,096 | 22 | -2,6 | 877,7037 | 34,45 | 0        | 1 | 11641 | 150211-Fr_I_Helo-red-alk-tryp-001.raw | 1  | 1  | P86822.2:P0C8W4.2:AFP87551.1                                 | 2 3-dihydro-2 2-dimethyl-7-benzofuranol N-methyl carbamate; Carbamidomethylation | S3:2 3-dihydro-2 2-dimethyl-7-benzofuranol N-methyl carbamate:14.04;C9:Carbamidomethylation:1000.00;C16:Carbamidomethylation:1000.00;C20:Carbamidomethylation:1000.00 |
| <b>YLFLTDSNFR</b>                                             | 46,26 | 1274,63  | 10 | -0,7 | 638,3216 | 34,27 | 1,61E+08 | 1 | 11574 | 150211-Fr_I_Helo-red-alk-tryp-001.raw | 69 | 69 | AIJ02112.2                                                   |                                                                                  |                                                                                                                                                                       |
| <b>VTES(+58.03)DKQTILETHNQLR</b>                              | 46,2  | 2069,063 | 17 | -3,1 | 690,6927 | 30,15 | 0        | 1 | 10120 | 150211-Fr_I_Helo-red-alk-tryp-001.raw | 3  | 3  | JAW07031.1:JAW06995.1                                        | 2 3-dihydro-2 2-dimethyl-7-benzofuranol N-methyl carbamate                       | S4:2 3-dihydro-2 2-dimethyl-7-benzofuranol N-methyl carbamate:1000.00                                                                                                 |
| <b>APEAAPE(+21.98)PAAAAPE</b>                                 | 46,07 | 1312,591 | 14 | -1,8 | 657,3016 | 6,07  | 2,99E+08 | 1 | 1554  | 150211-Fr_I_Helo-red-alk-tryp-001.raw | 56 | 56 | JAW07022.1:P86821.1:P0C8W6.1                                 | Sodium adduct                                                                    | E7:Sodium adduct:56.15                                                                                                                                                |
| <b>GSSGYC(+57.02)AWPAC(+57.02)YC(+57.02)YGLPD(+17.03)SVK</b>  | 45,93 | 2414,013 | 21 | -0,9 | 805,6776 | 42,82 | 0        | 1 | 14680 | 150211-Fr_I_Helo-red-alk-tryp-001.raw | 6  | 6  | AAC25688.1:O77463.1: AAC25689.1                              | Carbamidomethylation; Replacement of proton with ammonium ion                    | C6:Carbamidomethylation:1000.00;C11:Carbamidomethylation:1000.00;C13:Carbamidomethylation:1000.00;D18:Replacement of proton with ammonium ion:10.22                   |
| <b>EALAPEPAPEPAPEAAPEA APEAAAAPE</b>                          | 45,91 | 3154,498 | 33 | 1    | 631,9075 | 40,9  | 0        | 1 | 13987 | 150211-Fr_I_Helo-red-alk-tryp-001.raw | 3  | 3  | JAW07022.1:P86821.1                                          |                                                                                  |                                                                                                                                                                       |
| <b>EALAPEPAPEPAPEAAPE(+17.03)AAPEAAAAPE</b>                   | 45,83 | 3171,525 | 33 | 3,5  | 1058,186 | 44,1  | 0        | 1 | 15141 | 150211-Fr_I_Helo-red-alk-tryp-001.raw | 1  | 1  | JAW07022.1:P86821.1                                          | Replacement of proton with ammonium ion                                          | E22:Replacement of proton with ammonium ion:0.00                                                                                                                      |
| <b>TITAVEIPDPFVDAIR</b>                                       | 45,74 | 1942,02  | 17 | 2,9  | 972,0201 | 52,98 | 0        | 1 | 18178 | 150211-Fr_I_Helo-red-alk-tryp-001.raw | 1  | 1  | JAW06991.1:JAW07032.1:JAG85159.1                             |                                                                                  |                                                                                                                                                                       |
| <b>ESLIPGEEVFD(+21.98)FGHVVG N(+.98)LNVLNC(+57.02)K</b>       | 45,73 | 2808,34  | 25 | 4,2  | 703,0953 | 52,44 | 0        | 1 | 18003 | 150211-Fr_I_Helo-red-alk-tryp-001.raw | 1  | 1  | AIJ02112.2                                                   | Sodium adduct; Deamidation (NQ); Carbamidomethylation                            | D11:Sodium adduct:0.00;N18:Deamidation (NQ):22.85;C24:Carbamidomethylation:1000.00                                                                                    |
| <b>WM(sub L)PLSGPVSGILPHEGK</b>                               | 45,67 | 1803,934 | 17 | 2    | 602,3198 | 37,75 | 0        | 1 | 12841 | 150211-Fr_I_Helo-red-alk-tryp-001.raw | 1  | 1  | XP_023242894.1                                               |                                                                                  |                                                                                                                                                                       |
| <b>AEIDFSGIPE(+53.92)DIK</b>                                  | 45,59 | 1599,712 | 14 | -2,1 | 534,2435 | 38,37 | 0        | 1 | 13072 | 150211-Fr_I_Helo-red-alk-tryp-001.raw | 8  | 8  | JAW06987.1:JAW07038.1:JAW06992.1:P84190.1                    | Replacement of 2 protons by iron                                                 | E10:Replacement of 2 protons by iron:12.28                                                                                                                            |

J Venom Anim Toxins incl Trop Dis, 2019

|                                                  |       |          |    |      |          |       |          |   |       |                                       |     |     |                                           |                                                                                                                                                                           |
|--------------------------------------------------|-------|----------|----|------|----------|-------|----------|---|-------|---------------------------------------|-----|-----|-------------------------------------------|---------------------------------------------------------------------------------------------------------------------------------------------------------------------------|
| Q(sub A)DVDFGTGIADSIK                            | 45,55 | 1520,772 | 14 | -0,4 | 761,3931 | 45,02 | 3,12E+09 | 1 | 15469 | 150211-Fr_I_Helo-red-alk-tryp-001.raw | 44  | 44  | JAW07002.1:P86824.1                       |                                                                                                                                                                           |
| ESLIPGEER(sub V)FDFGHVVGNLNLVNC(+57.02)K         | 45,52 | 2842,407 | 25 | -3,3 | 948,4733 | 53,33 | 0        | 1 | 18292 | 150211-Fr_I_Helo-red-alk-tryp-001.raw | 2   | 2   | AIJ02112.2                                | Carbamidomethylation<br>C24:Carbamidomethylation:1000.00                                                                                                                  |
| G(sub A)DVDFGTGIADSIK                            | 45,51 | 1449,735 | 14 | -0,9 | 725,8742 | 43,05 | 0        | 1 | 14764 | 150211-Fr_I_Helo-red-alk-tryp-001.raw | 4   | 4   | JAW07002.1:P86824.1                       |                                                                                                                                                                           |
| KQNEPSFIEDS(+58.03)AIPGHQ QVLDPVDLVK             | 45,5  | 3060,564 | 27 | -2,8 | 1021,192 | 43,62 | 0        | 1 | 14966 | 150211-Fr_I_Helo-red-alk-tryp-001.raw | 1   | 1   | AIJ02110.2                                | 2 3-dihydro-2 2-dimethyl-7-benzofuranol N-methyl carbamate<br>S11:2 3-dihydro-2 2-dimethyl-7-benzofuranol N-methyl carbamate:0.00                                         |
| SPC(+57.02)IIIDYLC(+57.02)VTE(+356.19)TTF        | 45,41 | 2287,094 | 16 | -2,2 | 763,3702 | 51,23 | 0        | 1 | 17601 | 150211-Fr_I_Helo-red-alk-tryp-001.raw | 1   | 1   | AIJ02110.2                                | Carbamidomethylation; Biotin polyethyleneoxide amine<br>C3:Carbamidomethylation:1000.00;C10:Carbamidomethylation:1000.00;E13:Biotin polyethyleneoxide amine:109.28        |
| QTILETHNQLR                                      | 45,34 | 1351,721 | 11 | -0,9 | 451,5805 | 5,93  | 0        | 1 | 1502  | 150211-Fr_I_Helo-red-alk-tryp-001.raw | 8   | 8   | JAW07031.1:JAW06995.1                     |                                                                                                                                                                           |
| PEPAPEPAPEAAPEAAPEAAAA PER(+290.18)              | 45,3  | 2822,39  | 26 | 0,4  | 941,8044 | 37,92 | 0        | 1 | 12905 | 150211-Fr_I_Helo-red-alk-tryp-001.raw | 1   | 1   | JAW07022.1                                | Levuglandinyl - arginine lactam adduct<br>R26:Levuglandinyl - arginine lactam adduct:1000.00                                                                              |
| NVLVIAPPDPSVFSPPDRDIELA                          | 45,18 | 2478,264 | 23 | -0,1 | 827,0952 | 51,86 | 4,67E+07 | 1 | 17811 | 150211-Fr_I_Helo-red-alk-tryp-001.raw | 1   | 1   | AIJ02118.2                                |                                                                                                                                                                           |
| FGPD(sub N)VAGETAASEVNFHFSAPHLIFP EGМК           | 45,12 | 3201,523 | 30 | 5,3  | 641,3152 | 51,07 | 0        | 1 | 17548 | 150211-Fr_I_Helo-red-alk-tryp-001.raw | 2   | 2   | JAW07031.1:JAW06995.1                     |                                                                                                                                                                           |
| APEPAPEPAPEAAPEAAPE PAAAAPE(+37.03)RR            | 45,1  | 3190,568 | 32 | -2,8 | 1064,527 | 40,7  | 0        | 1 | 13913 | 150211-Fr_I_Helo-red-alk-tryp-001.raw | 3   | 3   | JAW07022.1                                | Propargylamine<br>E30:Propargylamine:0.00                                                                                                                                 |
| SITPDGPQIR                                       | 44,96 | 1082,572 | 10 | -0,1 | 542,2932 | 29,93 | 3,84E+07 | 1 | 10051 | 150211-Fr_I_Helo-red-alk-tryp-001.raw | 105 | 105 | JAW07031.1:JAW06995.1                     |                                                                                                                                                                           |
| AEIDFSGIPEDIKEIKE(+43.99)                        | 44,87 | 2089,047 | 18 | 1    | 1045,532 | 49,51 | 0        | 1 | 17027 | 150211-Fr_I_Helo-red-alk-tryp-001.raw | 1   | 1   | P84190.1                                  | Carboxylation (E)<br>E18:Carboxylation (E):0.00                                                                                                                           |
| ESLIPGEEVDFGHVVGNL                               | 44,83 | 2057,011 | 19 | -0,4 | 1029,512 | 52,18 | 3,88E+08 | 1 | 17915 | 150211-Fr_I_Helo-red-alk-tryp-001.raw | 2   | 2   | AIJ02112.2                                |                                                                                                                                                                           |
| EID(-18.01)FSGIPEDIK                             | 44,77 | 1456,745 | 13 | 0,7  | 729,3802 | 51,07 | 0        | 1 | 17547 | 150211-Fr_I_Helo-red-alk-tryp-001.raw | 2   | 2   | JAW06987.1:JAW07038.1:JAW06992.1:P84190.1 | Dehydration<br>D3:Dehydration:39.76                                                                                                                                       |
| IWTSETNK                                         | 44,76 | 977,4818 | 8  | -0,8 | 489,7478 | 16,29 | 4,90E+08 | 1 | 5254  | 150211-Fr_I_Helo-red-alk-tryp-001.raw | 257 | 257 | AAC25688.1:O77463.1:AA25689.1             |                                                                                                                                                                           |
| C(+57.02)YGLPDSVK                                | 44,65 | 1037,485 | 9  | 0,3  | 519,75   | 30,6  | 0        | 1 | 10274 | 150211-Fr_I_Helo-red-alk-tryp-001.raw | 3   | 3   | AAC25688.1:O77463.1:AA25689.1             | Carbamidomethylation<br>C1:Carbamidomethylation:1000.00                                                                                                                   |
| F(+43.01)FLNK(+14.02)DEASC(+57.02)VVSAC(+57.02)K | 44,62 | 1930,892 | 16 | 2    | 966,4551 | 17,15 | 0        | 1 | 5574  | 150211-Fr_I_Helo-red-alk-tryp-001.raw | 1   | 1   | AIJ02112.2                                | Carbamylation; Methylation(KR); Carbamidomethylation<br>F1:Carbamylation:65.28;K5:Methylation(KR):69.77;C10:Carbamidomethylation:1000.00;C15:Carbamidomethylation:1000.00 |
| Q(sub A)EIDFSGIPEDIK                             | 44,48 | 1602,814 | 14 | -0,3 | 802,4141 | 42,09 | 1,23E+10 | 1 | 14418 | 150211-Fr_I_Helo-red-alk-tryp-001.raw | 576 | 576 | JAW06987.1:JAW07038.1:JAW06992.1:P84190.1 |                                                                                                                                                                           |
| ADIIMLIVSR                                       | 44,41 | 1129,653 | 10 | 1    | 565,8342 | 35,95 | 0        | 1 | 12176 | 150211-Fr_I_Helo-red-alk-tryp-001.raw | 2   | 2   | JAW07039.1:JAG85190.1                     |                                                                                                                                                                           |

J Venom Anim Toxins incl Trop Dis, 2019

|                                                                       |       |          |    |      |          |       |          |   |       |                                       |     |     |                                                                                                     |                                                            |                                                                                                                                                             |
|-----------------------------------------------------------------------|-------|----------|----|------|----------|-------|----------|---|-------|---------------------------------------|-----|-----|-----------------------------------------------------------------------------------------------------|------------------------------------------------------------|-------------------------------------------------------------------------------------------------------------------------------------------------------------|
| AEIDFSGIPE(+37.96)DIIKEI                                              | 44,38 | 1825,875 | 16 | -1,1 | 913,9438 | 51,02 | 0        | 1 | 17530 | 150211-Fr_I_Helo-red-alk-tryp-001.raw | 1   | 1   | P84190.1                                                                                            | Replacement of proton by potassium                         | E10:Replacement of proton by potassium:0.00                                                                                                                 |
| AEIDFSGIPEDIIG(sub K)QIK                                              | 44,32 | 1843,957 | 17 | -0,3 | 922,9853 | 50,22 | 2,98E+08 | 1 | 17265 | 150211-Fr_I_Helo-red-alk-tryp-001.raw | 4   | 4   | JAW06987.1:JAW07038.1:JAW06992.1                                                                    |                                                            |                                                                                                                                                             |
| ET(-18.01)NAKPPA                                                      | 44,31 | 808,4079 | 8  | 0,8  | 405,2115 | 74,97 | 0        | 1 | 25270 | 150211-Fr_I_Helo-red-alk-tryp-001.raw | 1   | 1   | JAW06987.1:JAW07038.1:JAW06992.1:P84190.1:JAW07002.1                                                | Dehydration                                                | T2:Dehydration:1000.00                                                                                                                                      |
| I(+43.01)DKPLILHPFAFR                                                 | 44,19 | 1608,914 | 13 | -0,4 | 537,3117 | 34,02 | 0        | 1 | 11486 | 150211-Fr_I_Helo-red-alk-tryp-001.raw | 4   | 4   | XP_023239442.1                                                                                      | Carbamylation                                              | I1:Carbamylation:0.00                                                                                                                                       |
| VGVAQDDSDYNERVD                                                       | 44,16 | 1680,723 | 15 | -0,9 | 841,3679 | 29,83 | 0        | 1 | 10020 | 150211-Fr_I_Helo-red-alk-tryp-001.raw | 3   | 3   | AIJ02110.2:JAG85213.1                                                                               |                                                            |                                                                                                                                                             |
| AEIDFSGIPED(+21.98)IHK                                                | 43,98 | 1567,775 | 14 | -0,3 | 784,8943 | 72,94 | 6,55E+06 | 1 | 24621 | 150211-Fr_I_Helo-red-alk-tryp-001.raw | 28  | 28  | JAW06987.1:JAW07038.1:JAW06992.1:P84190.1                                                           | Sodium adduct                                              | D11:Sodium adduct:0.00                                                                                                                                      |
| H(+163.05)QIGDYTHVEQNFAV<br>ATYSIGTEIKPSQR                            | 43,9  | 3451,662 | 29 | -3,1 | 691,3375 | 37,72 | 0        | 1 | 12828 | 150211-Fr_I_Helo-red-alk-tryp-001.raw | 1   | 1   | JAW07036.1:JAW06986.1                                                                               | Phenethyl isothiocyanate                                   | H1:Phenethyl isothiocyanate:84.74                                                                                                                           |
| GGREGYPADSK                                                           | 43,71 | 1135,526 | 11 | 0,4  | 568,7704 | 6,06  | 4,36E+07 | 1 | 1548  | 150211-Fr_I_Helo-red-alk-tryp-001.raw | 66  | 66  | AAC25688.1:O77463.1: AAC25689.1                                                                     |                                                            |                                                                                                                                                             |
| ITC(+57.02)FLTAAGYC(+57.02)<br>N(+.98)TEC(+57.02)TLKK                 | 43,56 | 2251,032 | 19 | 4,5  | 1126,528 | 18,14 | 0        | 1 | 5953  | 150211-Fr_I_Helo-red-alk-tryp-001.raw | 1   | 1   | AAC25688.1:O77463.1: AAC25689.1                                                                     | Carbamidomethylation; Deamidation (NQ)                     | C3:Carbamidomethylation:1000.00;C11:Carbamidomethylation:1000.00;N12:Deamidation (NQ):1000.00;C15:Carbamidomethylation:1000.00                              |
| LKEALAPEPAPEPEP                                                       | 43,55 | 1754,909 | 17 | 3,8  | 878,4651 | 16,9  | 0        | 1 | 5482  | 150211-Fr_I_Helo-red-alk-tryp-001.raw | 1   | 1   | JAW07022.1:P86821.1                                                                                 |                                                            |                                                                                                                                                             |
| AEIDFSGIPEDIK(+58.01)QIK                                              | 43,54 | 1973,036 | 17 | 1,2  | 658,6866 | 48,59 | 0        | 1 | 16707 | 150211-Fr_I_Helo-red-alk-tryp-001.raw | 2   | 2   | JAW06987.1:JAW07038.1:JAW06992.1                                                                    | Carboxymethyl (KW X@N-term)                                | K14:Carboxymethyl (KW X@N-term):11.12                                                                                                                       |
| PEPAPEPAPEAAPEAAPEAAAA<br>P(+31.99)ERRR                               | 43,47 | 2876,405 | 28 | -5,1 | 959,8041 | 36,79 | 0        | 1 | 12487 | 150211-Fr_I_Helo-red-alk-tryp-001.raw | 1   | 1   | JAW07022.1                                                                                          | Dihydroxy                                                  | P24:Dihydroxy:0.00                                                                                                                                          |
| NM(sub<br>E)PSFIEDSAIPGHQQVLDPVLDV<br>K                               | 43,47 | 2748,379 | 25 | 1,6  | 917,1351 | 46,01 | 0        | 1 | 15816 | 150211-Fr_I_Helo-red-alk-tryp-001.raw | 1   | 1   | AIJ02110.2                                                                                          |                                                            |                                                                                                                                                             |
| DFSGIPEDIK                                                            | 43,37 | 1232,629 | 11 | -0,5 | 617,3214 | 31,14 | 0        | 1 | 10460 | 150211-Fr_I_Helo-red-alk-tryp-001.raw | 6   | 6   | JAW06987.1:JAW07038.1:JAW06992.1:P84190.1                                                           |                                                            |                                                                                                                                                             |
| LAPEPAPEPAPEAAPEAAP<br>EPAAPAE                                        | 43,32 | 2954,419 | 31 | 0,7  | 985,8141 | 39    | 0        | 1 | 13296 | 150211-Fr_I_Helo-red-alk-tryp-001.raw | 1   | 1   | JAW07022.1:P86821.1                                                                                 |                                                            |                                                                                                                                                             |
| VWDYATNK                                                              | 43,31 | 995,4713 | 8  | -0,1 | 498,7429 | 7,95  | 1,43E+08 | 1 | 2233  | 150211-Fr_I_Helo-red-alk-tryp-001.raw | 113 | 113 | JAW07016.1:JAW06979.1:P68411.1:1913435A:P68410.1:AAB36322.1:COHJM9.1:JAG85185.1:CEF39517.1:P60276.1 |                                                            |                                                                                                                                                             |
| ADVDFGTGIADSIIF(sub K)K                                               | 43,17 | 1610,819 | 15 | -1,3 | 806,4158 | 50,39 | 0        | 1 | 17321 | 150211-Fr_I_Helo-red-alk-tryp-001.raw | 2   | 2   | JAW07002.1                                                                                          |                                                            |                                                                                                                                                             |
| G(+42.01)SSGYC(+57.02)AW(+<br>15.99)PAC(+57.02)YC(+57.02)Y<br>GLPDSVK | 43,07 | 2454,992 | 21 | 4,1  | 819,3412 | 45,52 | 0        | 1 | 15644 | 150211-Fr_I_Helo-red-alk-tryp-001.raw | 2   | 2   | AAC25688.1:O77463.1: AAC25689.1                                                                     | Acetylation (N-term); Carbamidomethylation; Oxidation (HW) | G1:Acetylation (N-term):1000.00;C6:Carbamidomethylation:1000.00;W8:Oxidation (HW):1000.00;C11:Carbamidomethylation:1000.00;C13:Carbamidomethylation:1000.00 |

J Venom Anim Toxins incl Trop Dis, 2019

|                                                                    |       |          |    |      |          |       |          |   |       |                                       |     |     |                                                              |                                                                                  |                                                                                                                                                                       |
|--------------------------------------------------------------------|-------|----------|----|------|----------|-------|----------|---|-------|---------------------------------------|-----|-----|--------------------------------------------------------------|----------------------------------------------------------------------------------|-----------------------------------------------------------------------------------------------------------------------------------------------------------------------|
| <b>EALAPEPAPEAPE(+53.92)PAP EA</b>                                 | 43,03 | 1935,819 | 19 | -3,5 | 968,9133 | 35,36 | 0        | 1 | 11966 | 150211-Fr_I_Helo-red-alk-tryp-001.raw | 1   | 1   | JAW07022.1:P86821.1                                          | Replacement of 2 protons by iron                                                 | E14:Replacement of 2 protons by iron:0.00                                                                                                                             |
| <b>KEALAPEPAPEP</b>                                                | 42,94 | 1247,64  | 12 | -0,3 | 624,8269 | 23,3  | 1,37E+09 | 1 | 7867  | 150211-Fr_I_Helo-red-alk-tryp-001.raw | 153 | 153 | JAW07022.1:P86821.1                                          |                                                                                  |                                                                                                                                                                       |
| <b>AEIDFSGIPEDIKEI(-.98)</b>                                       | 42,81 | 2044,073 | 18 | 1,4  | 682,3658 | 38,22 | 0        | 1 | 13018 | 150211-Fr_I_Helo-red-alk-tryp-001.raw | 1   | 1   | P84190.1                                                     | Amidation                                                                        | E18:Amidation:1000.00                                                                                                                                                 |
| <b>RLTS(+58.03)QSEYAC(+57.02)PAIDKFC(+57.02)EDHC(+57.02)AK</b>     | 42,77 | 2914,292 | 24 | -2,1 | 729,5788 | 32,4  | 0        | 1 | 10900 | 150211-Fr_I_Helo-red-alk-tryp-001.raw | 1   | 1   | P86822.2:POC8W4.2:AFP87551.1                                 | 2 3-dihydro-2 2-dimethyl-7-benzofuranol N-methyl carbamate; Carbamidomethylation | S4:2 3-dihydro-2 2-dimethyl-7-benzofuranol N-methyl carbamate:0.00;C10:Carbamidomethylation:1000.00;C17:Carbamidomethylation:1000.00;C21:Carbamidomethylation:1000.00 |
| <b>A(+43.01)SSGYC(+57.02)AWPAC(+57.02)YC(+57.02)YGVPSN(+.98)IK</b> | 42,7  | 2454,008 | 21 | -1,9 | 819,0083 | 41,88 | 9,86E+08 | 1 | 14340 | 150211-Fr_I_Helo-red-alk-tryp-001.raw | 2   | 2   | C0HJM9.1:JAG85185.1:CEF39517.1:P60276.1                      | Carbamylation; Carbamidomethylation; Deamidation (NQ)                            | A1:Carbamylation:76.28;C6:Carbamidomethylation:1000.00;C11:Carbamidomethylation:1000.00;C13:Carbamidomethylation:1000.00;N19:Deamidation (NQ):1000.00                 |
| <b>RLTSQSEYAC(+57.02)PAIDK</b>                                     | 42,62 | 1737,836 | 15 | -1   | 869,9242 | 30,28 | 0        | 1 | 10165 | 150211-Fr_I_Helo-red-alk-tryp-001.raw | 2   | 2   | P86822.2:POC8W4.2:AFP87551.1                                 | Carbamidomethylation                                                             | C10:Carbamidomethylation:1000.00                                                                                                                                      |
| <b>FFTLPQASC(+57.02)LR</b>                                         | 42,6  | 1338,675 | 11 | 0,2  | 670,3451 | 34,05 | 0        | 1 | 11497 | 150211-Fr_I_Helo-red-alk-tryp-001.raw | 1   | 1   | JAW07039.1                                                   | Carbamidomethylation                                                             | C9:Carbamidomethylation:1000.00                                                                                                                                       |
| <b>T(sub V)N(sub D)TVAHETAHLIGAPHDEEGPEQTGISGSPGAK</b>             | 42,56 | 3307,571 | 33 | 1,9  | 1103,533 | 15,64 | 0        | 1 | 5013  | 150211-Fr_I_Helo-red-alk-tryp-001.raw | 2   | 2   | AIJ02110.2                                                   |                                                                                  |                                                                                                                                                                       |
| <b>AEIDFSGIPEDIK(+28.03)Q</b>                                      | 42,29 | 1701,882 | 15 | 4,9  | 851,9527 | 37,05 | 6,68E+08 | 1 | 12585 | 150211-Fr_I_Helo-red-alk-tryp-001.raw | 1   | 1   | JAW06987.1:JAW07038.1:JAW06992.1                             | Dimethylation(KR)                                                                | K14:Dimethylation(KR):1000.00                                                                                                                                         |
| <b>TEPSFIKDNLIPGPPAAFDPDVLISAM(+15.99)SK(-.98)(+42.01)</b>         | 42,28 | 3126,595 | 29 | -0,3 | 1043,205 | 50,89 | 1,69E+09 | 1 | 17486 | 150211-Fr_I_Helo-red-alk-tryp-001.raw | 2   | 2   | AIJ02109.2:P86392.3:V9Z9A3.1:AHE40589.1:AHE40588.1           | Oxidation (M); Amidation; Acetylation (K)                                        | M27:Oxidation (M):1000.00;K29:Amidation:1000.00;K29:Acetylation (K):22.04                                                                                             |
| <b>ASSGYC(+57.02)AWPAC(+57.02)YC(+57.02)YGVDPHIK(+114.04)</b>      | 42    | 2575,072 | 21 | -1,8 | 859,363  | 37,08 | 0        | 1 | 12596 | 150211-Fr_I_Helo-red-alk-tryp-001.raw | 2   | 2   | JAW07016.1:JAW06979.1:P68411.1:1913435A:P68410.1:AA B36322.1 | Carbamidomethylation; Ubiquitin                                                  | C6:Carbamidomethylation:1000.00;C11:Carbamidomethylation:1000.00;C13:Carbamidomethylation:1000.00;K21:Ubiquitin:47.57                                                 |
| <b>APEAAPEAAAAPE</b>                                               | 42    | 1290,609 | 14 | -0,7 | 646,3114 | 19,41 | 3,13E+09 | 1 | 6436  | 150211-Fr_I_Helo-red-alk-tryp-001.raw | 241 | 241 | JAW07022.1:P86821.1:POC8W6.1                                 |                                                                                  |                                                                                                                                                                       |
| <b>AEIDFSGIPEDIKR(sub E)</b>                                       | 41,83 | 1701,894 | 15 | 0,2  | 568,3053 | 37,12 | 1,85E+09 | 1 | 12611 | 150211-Fr_I_Helo-red-alk-tryp-001.raw | 4   | 4   | P84190.1                                                     |                                                                                  |                                                                                                                                                                       |
| <b>N(sub G)APAQYLDISYIR</b>                                        | 41,72 | 1522,778 | 13 | 0,7  | 762,3968 | 33,61 | 0        | 1 | 11335 | 150211-Fr_I_Helo-red-alk-tryp-001.raw | 1   | 1   | JAW06991.1:JAW07032.1:JAG85159.1                             |                                                                                  |                                                                                                                                                                       |
| <b>AEID(+53.92)FSGIPEDIK</b>                                       | 41,7  | 1599,712 | 14 | -0,4 | 534,2444 | 38,58 | 0        | 1 | 13148 | 150211-Fr_I_Helo-red-alk-tryp-001.raw | 19  | 19  | JAW06987.1:JAW07038.1:JAW06992.1:P84190.1                    | Replacement of 2 protons by iron                                                 | D4:Replacement of 2 protons by iron:0.00                                                                                                                              |



J Venom Anim Toxins incl Trop Dis, 2019

|                                                               |       |          |    |      |          |       |          |   |       |                                       |    |    |                                                                                                                                                                               |                                                                |                                                                                                                                                    |
|---------------------------------------------------------------|-------|----------|----|------|----------|-------|----------|---|-------|---------------------------------------|----|----|-------------------------------------------------------------------------------------------------------------------------------------------------------------------------------|----------------------------------------------------------------|----------------------------------------------------------------------------------------------------------------------------------------------------|
| <b>AEIDFSGIPEDIK(+114.04)</b>                                 | 41,65 | 1659,835 | 14 | -2,1 | 830,9232 | 42,79 | 0        | 1 | 14669 | 150211-Fr_I_Helo-red-alk-tryp-001.raw | 19 | 19 | JAW06987.1:JAW07038.1:JAW06992.1:P84190.1                                                                                                                                     | Ubiquitin                                                      | K14:Ubiquitin:26.68                                                                                                                                |
| <b>KVLLISFDGFR</b>                                            | 41,49 | 1293,745 | 11 | 1,3  | 647,8804 | 36,06 | 0        | 1 | 12219 | 150211-Fr_I_Helo-red-alk-tryp-001.raw | 1  | 1  | XP_023242894.1:XP_023242898.1                                                                                                                                                 |                                                                |                                                                                                                                                    |
| <b>KGS(+59.02)SGYC(+57.02)AWPAC(+57.02)YC(+57.02)YGLPDSVK</b> | 41,49 | 2584,101 | 22 | 1    | 862,375  | 38    | 0        | 1 | 12937 | 150211-Fr_I_Helo-red-alk-tryp-001.raw | 3  | 3  | AAC25688.1:O77463.1:AAC25689.1                                                                                                                                                | Aminoethylcysteine; Carbamidomethylation                       | S3:Aminoethylcysteine:0.00;C7:Carbamidomethylation:1000.00;C12:Carbamidomethylation:1000.00;C14:Carbamidomethylation:1000.00                       |
| <b>EPAPEAPEAAPEAAPEAAAAPE</b>                                 | 41,42 | 2279,059 | 24 | -3,2 | 1140,533 | 15,97 | 0        | 1 | 5132  | 150211-Fr_I_Helo-red-alk-tryp-001.raw | 5  | 5  | JAW07022.1:P86821.1                                                                                                                                                           |                                                                |                                                                                                                                                    |
| <b>KGSSGYC(+57.02)AWPAC(+57.02)</b>                           | 41,41 | 1342,544 | 12 | -0,2 | 672,2789 | 31,04 | 0        | 1 | 10425 | 150211-Fr_I_Helo-red-alk-tryp-001.raw | 1  | 1  | AAC25688.1:O77463.1:AAC25689.1:AAW72453.1:Q5G8B8.1:AAB29128.1:P56612.1:AIA81145.1:CAA46982.1:P15226.2:PODMM8.1:1NPI:1B7D:AAB36321.1:AAB36318.1:P56611.1:JAG85191.1:JAG85210.1 | Carbamidomethylation                                           | C7:Carbamidomethylation:1000.00;C12:Carbamidomethylation:1000.00                                                                                   |
| <b>A(+380.15)C(+57.02)PAIDKFC(+57.02)EDHC(+57.02)AAK</b>      | 41,32 | 2271,949 | 16 | -3,4 | 758,3209 | 31,74 | 0        | 1 | 10665 | 150211-Fr_I_Helo-red-alk-tryp-001.raw | 3  | 3  | P86822.2:POC8W4.2:AFP87551.1:Q0GY42.1:ABE98265.1:JAG85223.1                                                                                                                   | Nucleophilic addition to cytopiloyne+H2O; Carbamidomethylation | A1:Nucleophilic addition to cytopiloyne+H2O:90.57;C2:Carbamidomethylation:1000.00;C9:Carbamidomethylation:1000.00;C13:Carbamidomethylation:1000.00 |
| <b>APEAPEAAPEAAPEPAA</b>                                      | 41,19 | 1684,794 | 18 | -0,9 | 843,4037 | 14,3  | 0        | 1 | 4521  | 150211-Fr_I_Helo-red-alk-tryp-001.raw | 13 | 13 | JAW07022.1:P86821.1                                                                                                                                                           |                                                                |                                                                                                                                                    |
| <b>LAPEAPEAPEAPEAPEA</b>                                      | 40,92 | 1681,82  | 17 | -0,8 | 841,9165 | 17,89 | 2,71E+08 | 1 | 5856  | 150211-Fr_I_Helo-red-alk-tryp-001.raw | 26 | 26 | JAW07022.1:P86821.1                                                                                                                                                           |                                                                |                                                                                                                                                    |
| <b>S(+58.03)LFVGEDVFNMEIAK</b>                                | 40,89 | 1868,947 | 16 | -3   | 935,4778 | 50,9  | 0        | 1 | 17490 | 150211-Fr_I_Helo-red-alk-tryp-001.raw | 2  | 2  | AMO02558.1:JAW07025.1                                                                                                                                                         | 2 3-dihydro-2 2-dimethyl-7-benzofuranol N-methyl carbamate     | S1:2 3-dihydro-2 2-dimethyl-7-benzofuranol N-methyl carbamate:1000.00                                                                              |
| <b>LIGIQFTK</b>                                               | 40,71 | 989,5909 | 9  | -0,1 | 495,8027 | 32,56 | 0        | 1 | 10956 | 150211-Fr_I_Helo-red-alk-tryp-001.raw | 32 | 32 | JAW07039.1:JAG85190.1:JAW07042.1                                                                                                                                              |                                                                |                                                                                                                                                    |
| <b>FINGGTDNSGIIITLLPGS(sub T)DS(sub P)SVTKR</b>               | 40,71 | 2661,397 | 26 | -1,4 | 888,1384 | 44,72 | 0        | 1 | 15361 | 150211-Fr_I_Helo-red-alk-tryp-001.raw | 2  | 2  | XP_023239442.1                                                                                                                                                                |                                                                |                                                                                                                                                    |
| <b>APEAAPEAAPEAAAAAP(-27.99)ER</b>                            | 40,63 | 1786,885 | 19 | -1,4 | 894,4484 | 30,99 | 0        | 1 | 10408 | 150211-Fr_I_Helo-red-alk-tryp-001.raw | 1  | 1  | JAW07022.1                                                                                                                                                                    | Pyrrolidone from Proline                                       | P17:Pyrrolidone from Proline:22.07                                                                                                                 |
| <b>KEALAPEAPEAPE(+37.96)PAPEA</b>                             | 40,58 | 2047,95  | 20 | -2,4 | 1024,98  | 33,54 | 0        | 1 | 11307 | 150211-Fr_I_Helo-red-alk-tryp-001.raw | 1  | 1  | JAW07022.1:P86821.1                                                                                                                                                           | Replacement of proton by potassium                             | E15:Replacement of proton by potassium:9.81                                                                                                        |
| <b>PEAAPEAAAAPEERR</b>                                        | 40,53 | 1531,774 | 15 | -1,8 | 766,8929 | 39,39 | 0        | 1 | 13439 | 150211-Fr_I_Helo-red-alk-tryp-001.raw | 3  | 3  | JAW07022.1                                                                                                                                                                    |                                                                |                                                                                                                                                    |
| <b>VTESDKQ(+.98)TILETHNQLR</b>                                | 40,45 | 2012,018 | 17 | 4,3  | 671,6827 | 27,72 | 0        | 1 | 9333  | 150211-Fr_I_Helo-red-alk-tryp-001.raw | 2  | 2  | JAW07031.1:JAW06995.1                                                                                                                                                         | Deamidation (NQ)                                               | Q7:Deamidation (NQ):79.54                                                                                                                          |

J Venom Anim Toxins incl Trop Dis, 2019

|                                                      |       |          |    |      |          |       |          |   |       |                                       |    |    |                                                    |                                                                                  |                                                                                                                              |
|------------------------------------------------------|-------|----------|----|------|----------|-------|----------|---|-------|---------------------------------------|----|----|----------------------------------------------------|----------------------------------------------------------------------------------|------------------------------------------------------------------------------------------------------------------------------|
| LAPEPAPEPAPEPAPEAAPEAAP<br>E(+17.03)PAAAAPE          | 40,39 | 2971,445 | 31 | 0,7  | 991,4896 | 39    | 0        | 1 | 13298 | 150211-Fr_I_Helo-red-alk-tryp-001.raw | 1  | 1  | JAW07022.1:P86821.1                                | Replacement of proton with ammonium ion                                          | E24:Replacement of proton with ammonium ion:8.82                                                                             |
| LTS(+58.03)QSEYAC(+57.02)PA<br>IDK                   | 40,37 | 1639,764 | 14 | -1,5 | 820,8879 | 7,79  | 0        | 1 | 2176  | 150211-Fr_I_Helo-red-alk-tryp-001.raw | 8  | 8  | P86822.2:POC8W4.2:AFP87551.1                       | 2 3-dihydro-2 2-dimethyl-7-benzofuranol N-methyl carbamate; Carbamidomethylation | S3:2 3-dihydro-2 2-dimethyl-7-benzofuranol N-methyl carbamate:26.31;C9:Carbamidomethylation:1000.00                          |
| SEYVSAPL(sub T)C(+57.02)AQ(sub S)GSQVIYAWAR          | 40,3  | 2355,132 | 21 | -0,7 | 1178,572 | 44,12 | 0        | 1 | 15149 | 150211-Fr_I_Helo-red-alk-tryp-001.raw | 1  | 1  | XP_023239442.1                                     | Carbamidomethylation                                                             | C9:Carbamidomethylation:1000.00                                                                                              |
| PEPAPEPAPEAAPEAAPEAAAA<br>PER(+199.07)RR             | 40,27 | 3043,482 | 28 | -0,1 | 1015,501 | 40,61 | 0        | 1 | 13879 | 150211-Fr_I_Helo-red-alk-tryp-001.raw | 3  | 3  | JAW07022.1                                         | Oxidized Arginine biotinylated with biotin hydrazide                             | R26:Oxidized Arginine biotinylated with biotin hydrazide:0.00                                                                |
| EALAPE(+37.96)PAPEP                                  | 40,26 | 1157,501 | 11 | -2,7 | 579,756  | 31,92 | 0        | 1 | 10728 | 150211-Fr_I_Helo-red-alk-tryp-001.raw | 2  | 2  | JAW07022.1:P86821.1                                | Replacement of proton by potassium                                               | E6:Replacement of proton by potassium:59.24                                                                                  |
| LATDDQC(+57.02)IVIEILS(+58.03)VTDKLVTK               | 40,23 | 2531,364 | 22 | -4,1 | 844,7919 | 55,27 | 0        | 1 | 18926 | 150211-Fr_I_Helo-red-alk-tryp-001.raw | 1  | 1  | AIJ02113.2                                         | Carbamidomethylation; 2 3-dihydro-2 2-dimethyl-7-benzofuranol N-methyl carbamate | C7:Carbamidomethylation:1000.00;S14:2 3-dihydro-2 2-dimethyl-7-benzofuranol N-methyl carbamate:1000.00                       |
| GSSGYC(+57.02)AWPAC(+57.02)YC(+57.02)YGLPD           | 39,95 | 2082,791 | 18 | -1,5 | 1042,401 | 44,64 | 0        | 1 | 15332 | 150211-Fr_I_Helo-red-alk-tryp-001.raw | 2  | 2  | AAC25688.1:O77463.1:AAC25689.1                     | Carbamidomethylation                                                             | C6:Carbamidomethylation:1000.00;C11:Carbamidomethylation:1000.00;C13:Carbamidomethylation:1000.00                            |
| QIKETN(+.98)AKPPA                                    | 39,9  | 1196,64  | 11 | -3   | 599,3255 | 9,57  | 0        | 1 | 2825  | 150211-Fr_I_Helo-red-alk-tryp-001.raw | 47 | 47 | JAW06987.1:JAW07038.1:JAW06992.1                   | Deamidation (NQ)                                                                 | N6:Deamidation (NQ):21.59                                                                                                    |
| ADVDFGTGIADSIIL(sub K)K                              | 39,89 | 1576,835 | 15 | -0,8 | 789,4241 | 49,69 | 0        | 1 | 17085 | 150211-Fr_I_Helo-red-alk-tryp-001.raw | 12 | 12 | JAW07002.1                                         |                                                                                  |                                                                                                                              |
| AQVIGITPFKK                                          | 39,8  | 1200,723 | 11 | -0,1 | 601,3687 | 14,29 | 0        | 1 | 4518  | 150211-Fr_I_Helo-red-alk-tryp-001.raw | 2  | 2  | AIJ02110.2:JAG85213.1                              |                                                                                  |                                                                                                                              |
| AEF(ins)IDFSGIPEDIK                                  | 39,71 | 1692,861 | 15 | 0,1  | 847,4379 | 46,9  | 0        | 1 | 16126 | 150211-Fr_I_Helo-red-alk-tryp-001.raw | 1  | 1  | JAW06987.1:JAW07038.1:JAW06992.1                   |                                                                                  |                                                                                                                              |
| AEIDFSGIPEDIK(+70.04)QIK                             | 39,67 | 1985,072 | 17 | -0,3 | 662,6978 | 47,16 | 0        | 1 | 16218 | 150211-Fr_I_Helo-red-alk-tryp-001.raw | 1  | 1  | JAW06987.1:JAW07038.1:JAW06992.1                   | Crotonaldehyde                                                                   | K14:Crotonaldehyde:5.08                                                                                                      |
| AEIDFSGIPEDIKR(sub Q)                                | 39,65 | 1701,894 | 15 | -0,4 | 851,9538 | 37,23 | 6,68E+08 | 1 | 12650 | 150211-Fr_I_Helo-red-alk-tryp-001.raw | 1  | 1  |                                                    |                                                                                  |                                                                                                                              |
| EIDFS(+150.04)GIPEDIK                                | 39,44 | 1624,797 | 13 | -1,7 | 542,6053 | 41,33 | 2,18E+08 | 1 | 14142 | 150211-Fr_I_Helo-red-alk-tryp-001.raw | 29 | 29 | JAW06987.1:JAW07038.1:JAW06992.1:P84190.1          | S-guanylation-2                                                                  | S5:S-guanylation-2:1000.00                                                                                                   |
| EGYPADSK                                             | 39,36 | 865,3817 | 8  | 1,7  | 433,6989 | 5,4   | 2,49E+07 | 1 | 1328  | 150211-Fr_I_Helo-red-alk-tryp-001.raw | 10 | 10 | AAC25688.1:O77463.1:AAC25689.1:AAW72463.1:Q5G8A8.1 |                                                                                  |                                                                                                                              |
| S(+59.02)SGYC(+57.02)AWPAC(+57.02)YC(+57.02)YGLPDSVK | 39,32 | 2398,984 | 20 | 1,2  | 1200,501 | 48,27 | 0        | 1 | 16599 | 150211-Fr_I_Helo-red-alk-tryp-001.raw | 4  | 4  | AAC25688.1:O77463.1:AAC25689.1                     | Aminoethylcysteine; Carbamidomethylation                                         | S1:Aminoethylcysteine:0.00;C5:Carbamidomethylation:1000.00;C10:Carbamidomethylation:1000.00;C12:Carbamidomethylation:1000.00 |
| APPEPAPEPAPEAAPEAAPE<br>PAAAAAP(+29.04)ER            | 39,32 | 3026,475 | 31 | -4,5 | 1009,828 | 39,14 | 0        | 1 | 13347 | 150211-Fr_I_Helo-red-alk-tryp-001.raw | 2  | 2  | JAW07022.1                                         | Dimethylation of proline residue                                                 | P29:Dimethylation of proline residue:8.82                                                                                    |
| AEIDFL(sub S)GIPEDIK                                 | 39,32 | 1571,845 | 14 | 0,1  | 786,9297 | 48,4  | 0        | 1 | 16645 | 150211-Fr_I_Helo-red-alk-tryp-001.raw | 1  | 1  | JAW06987.1:JAW07038.1:JAW06992.1                   |                                                                                  |                                                                                                                              |

J Venom Anim Toxins incl Trop Dis, 2019

|                                                            |       |          |    |      |          |       |          |   |      |                                       |                                       |     |                                                      |                                             |                                                                                  |                                                                                                                                                   |
|------------------------------------------------------------|-------|----------|----|------|----------|-------|----------|---|------|---------------------------------------|---------------------------------------|-----|------------------------------------------------------|---------------------------------------------|----------------------------------------------------------------------------------|---------------------------------------------------------------------------------------------------------------------------------------------------|
| <b>SC(+57.02)PYDDGYIMGS(+58.03)TIEPNMLK</b>                | 39,29 | 2348,025 | 20 | -1,6 | 1175,018 | 20,82 |          | 0 | 1    | 6967                                  | 150211-Fr_I_Helo-red-alk-tryp-001.raw | 8   | 8                                                    | JAG85190.1                                  | Carbamidomethylation; 2 3-dihydro-2 2-dimethyl-7-benzofuranol N-methyl carbamate | C2:Carbamidomethylation:100 0.00;S12:2 3-dihydro-2 2-dimethyl-7-benzofuranol N-methyl carbamate:0.00                                              |
| <b>FSGIPEDIK</b>                                           | 39,23 | 1117,602 | 10 | -0,1 | 559,8082 | 33,88 |          | 0 | 1    | 11433                                 | 150211-Fr_I_Helo-red-alk-tryp-001.raw | 19  | 19                                                   | JAW06987.1:JAW07038.1:JAW06992.1:P84190.1   |                                                                                  |                                                                                                                                                   |
| <b>L(ins)AEIDFSGIPEDIK</b>                                 | 39,22 | 1658,877 | 15 | -0,5 | 830,4451 | 45,6  |          | 0 | 1    | 15672                                 | 150211-Fr_I_Helo-red-alk-tryp-001.raw | 1   | 1                                                    | P84190.1                                    |                                                                                  |                                                                                                                                                   |
| <b>IDKPLV(sub I)LHPFAFR</b>                                | 39,19 | 1551,893 | 13 | 1    | 518,3053 | 33,99 |          | 0 | 1    | 11473                                 | 150211-Fr_I_Helo-red-alk-tryp-001.raw | 11  | 11                                                   | XP_023239442.1                              |                                                                                  |                                                                                                                                                   |
| <b>IDFSGIPEDIKQ</b>                                        | 39,14 | 1473,772 | 13 | 0,5  | 737,8934 | 37,84 |          | 0 | 1    | 12873                                 | 150211-Fr_I_Helo-red-alk-tryp-001.raw | 1   | 1                                                    | JAW06987.1:JAW07038.1:JAW06992.1            |                                                                                  |                                                                                                                                                   |
| <b>ITC(+57.02)FLTAAGYC(+57.02)NTE(+37.95)C(+57.02)TLK</b>  | 39,13 | 2159,9   | 18 | 0,2  | 540,9825 | 35,05 |          | 0 | 1    | 11853                                 | 150211-Fr_I_Helo-red-alk-tryp-001.raw | 2   | 2                                                    | AAC25688.1:O77463 .1:AAC25689.1             | Carbamidomethylation; Replacement of 2 protons by calcium                        | C3:Carbamidomethylation:100 0.00;C11:Carbamidomethylati on:1000.00;E14:Replacement of 2 protons by calcium:7.28;C15:Carbamidom ethylation:1000.00 |
| <b>VLLISFDGFR</b>                                          | 39,05 | 1165,65  | 10 | -2   | 583,8309 | 38,21 |          | 0 | 1    | 13015                                 | 150211-Fr_I_Helo-red-alk-tryp-001.raw | 2   | 2                                                    | XP_023242894.1:XP_023242898.1               |                                                                                  |                                                                                                                                                   |
| <b>VLLSFDGFR</b>                                           | 39,05 | 1165,65  | 10 | -2   | 583,8309 | 38,21 |          | 0 | 1    | 13015                                 | 150211-Fr_I_Helo-red-alk-tryp-001.raw | 2   | 2                                                    |                                             |                                                                                  |                                                                                                                                                   |
| <b>ADVD(+53.92)FTGIADSIK</b>                               | 38,92 | 1517,67  | 14 | 1,7  | 506,8982 | 37,97 |          | 0 | 1    | 12925                                 | 150211-Fr_I_Helo-red-alk-tryp-001.raw | 1   | 1                                                    | JAW07002.1:P86824 .1                        | Replacement of 2 protons by iron                                                 | D4:Replacement of 2 protons by iron:12.81                                                                                                         |
| <b>LMAETSIGVQNIIDTDMGIK</b>                                | 38,61 | 2261,165 | 21 | 1    | 754,7296 | 53,07 |          | 0 | 1    | 18208                                 | 150211-Fr_I_Helo-red-alk-tryp-001.raw | 1   | 1                                                    |                                             |                                                                                  |                                                                                                                                                   |
| <b>EAAPEPAAAAPE</b>                                        | 38,59 | 1122,519 | 12 | -0,2 | 562,2668 | 29,69 | 1,26E+07 | 1 | 9972 | 150211-Fr_I_Helo-red-alk-tryp-001.raw | 1                                     | 1   | JAW07022.1:P86821.1:POC8W6.1                         |                                             |                                                                                  |                                                                                                                                                   |
| <b>AEIDFSGIPE(+21.98)D</b>                                 | 38,5  | 1213,512 | 11 | -0,2 | 607,7629 | 35,73 |          | 0 | 1    | 12099                                 | 150211-Fr_I_Helo-red-alk-tryp-001.raw | 11  | 11                                                   | JAW06987.1:JAW07 038.1:JAW06992.1:P 84190.1 | Sodium adduct                                                                    | E10:Sodium adduct:27.42                                                                                                                           |
| <b>ETNAKPPA</b>                                            | 38,47 | 826,4185 | 8  | 0    | 414,2165 | 11,43 | 4,91E+08 | 1 | 3492 | 150211-Fr_I_Helo-red-alk-tryp-001.raw | 150                                   | 150 | JAW06987.1:JAW07038.1:JAW06992.1:P84190.1:JAW07002.1 |                                             |                                                                                  |                                                                                                                                                   |
| <b>F(+58.01)GC(+57.02)PAYEGYC(+57.02)NDHC(+57.02)NDIER</b> | 38,43 | 2433,905 | 19 | 5,2  | 1217,966 | 14,6  |          | 0 | 1    | 4631                                  | 150211-Fr_I_Helo-red-alk-tryp-001.raw | 1   | 1                                                    | POC2F3.1:P69940.2                           | Carboxymethyl (KW X@N-term); Carbamidomethylation                                | F1:Carboxymethyl (KW X@N-term):1000.00;C3:Carbamido methylation:1000.00;C10:Carb amidomethylation:1000.00;C1 4:Carbamidomethylation:1000 .00      |
| <b>SSAAN(+228.11)MMQMEWDD ELAAVAQAHANQC(+57.02)K</b>       | 38,29 | 3234,384 | 27 | 5    | 809,6072 | 33,77 |          | 0 | 1    | 11392                                 | 150211-Fr_I_Helo-red-alk-tryp-001.raw | 1   | 1                                                    | JAW07031.1:JAW06 995.1                      | 2 4-diacetamido-2 4 6-trideoxyglucopyranose; Carbamidomethylation                | N5:2 4-diacetamido-2 4 6-trideoxyglucopyranose:106.58 ;C26:Carbamidomethylation:1 000.00                                                          |
| <b>PAPEPAPEPAAPEAAPEPAA AAPER(+160.04)RR</b>               | 38,16 | 3172,542 | 30 | -3,1 | 1058,518 | 40,36 |          | 0 | 1    | 13790                                 | 150211-Fr_I_Helo-red-alk-tryp-001.raw | 2   | 2                                                    | JAW07022.1                                  | Condensation product of glucosone                                                | R28:Condensation product of glucosone:0.00                                                                                                        |
| <b>ITC(+57.02)FLTAAGYC(+57.02)NTE</b>                      | 38,14 | 1619,696 | 14 | -1   | 810,8544 | 32,69 |          | 0 | 1    | 11003                                 | 150211-Fr_I_Helo-red-alk-tryp-001.raw | 23  | 23                                                   | AAC25688.1:O77463 .1:AAC25689.1             | Carbamidomethylation                                                             | C3:Carbamidomethylation:100 0.00;C11:Carbamidomethylati on:1000.00                                                                                |

J Venom Anim Toxins incl Trop Dis, 2019

|                                                                 |       |          |    |      |          |       |          |   |       |                                       |    |    |                                                    |                                                                                  |                                                                                                                                                                       |
|-----------------------------------------------------------------|-------|----------|----|------|----------|-------|----------|---|-------|---------------------------------------|----|----|----------------------------------------------------|----------------------------------------------------------------------------------|-----------------------------------------------------------------------------------------------------------------------------------------------------------------------|
| <b>AEIDFSGIPEDIK(sub E)IK</b>                                   | 38,07 | 1900,056 | 17 | -0,2 | 951,0349 | 50,95 | 0        | 1 | 17507 | 150211-Fr_I_Helo-red-alk-tryp-001.raw | 2  | 2  | P84190.1                                           |                                                                                  |                                                                                                                                                                       |
| <b>ITC(+57.02)FLTAAGYC(+57.02)N(+.98)TEC(+57.02)TLKKG</b>       | 38,03 | 2308,054 | 20 | 0,4  | 1155,035 | 18,26 | 0        | 1 | 5998  | 150211-Fr_I_Helo-red-alk-tryp-001.raw | 1  | 1  | AAC25688.1:O77463.1:AAC25689.1                     | Carbamidomethylation; Deamidation (NQ)                                           | C3:Carbamidomethylation:1000.00;C11:Carbamidomethylati on:1000.00;N12:Deamidation (NQ):1000.00;C15:Carbamido methylation:1000.00                                      |
| <b>LKEALAPEPAPEPAPEAPEA</b>                                     | 37,99 | 2123,079 | 21 | -1,6 | 708,699  | 18,72 | 0        | 1 | 6173  | 150211-Fr_I_Helo-red-alk-tryp-001.raw | 1  | 1  | JAW07022.1:P86821.1                                |                                                                                  |                                                                                                                                                                       |
| <b>APEAAPEPAAAAP(-27.99)ER</b>                                  | 37,93 | 1418,715 | 15 | -0,1 | 710,3649 | 12,83 | 0        | 1 | 3991  | 150211-Fr_I_Helo-red-alk-tryp-001.raw | 8  | 8  | JAW07022.1                                         | Pyrrolidone from Proline                                                         | P13:Pyrrolidone from Proline:89.05                                                                                                                                    |
| <b>EPAAAAPEAAPE</b>                                             | 37,87 | 1122,519 | 12 | 0,1  | 562,267  | 29,89 | 1,26E+07 | 1 | 10038 | 150211-Fr_I_Helo-red-alk-tryp-001.raw | 22 | 22 | POC8W6.1                                           |                                                                                  |                                                                                                                                                                       |
| <b>C(+57.02)VAS(+58.03)DGFIMG DSIGENKEK</b>                     | 37,87 | 2113,953 | 19 | -1,8 | 529,4947 | 30,61 | 0        | 1 | 10278 | 150211-Fr_I_Helo-red-alk-tryp-001.raw | 2  | 2  | AMO02558.1:JAW07025.1:JAW06984.1                   | Carbamidomethylation; 2 3-dihydro-2 2-dimethyl-7-benzofuranol N-methyl carbamate | C1:Carbamidomethylation:1000.00;S4:2 3-dihydro-2 2-dimethyl-7-benzofuranol N-methyl carbamate:10.14                                                                   |
| <b>N(sub R)AEIDFSGIPEDIK</b>                                    | 37,8  | 1659,835 | 15 | -0,3 | 830,9247 | 46,25 | 6,92E+08 | 1 | 15900 | 150211-Fr_I_Helo-red-alk-tryp-001.raw | 2  | 2  | JAW06987.1:JAW07038.1:JAW06992.1                   |                                                                                  |                                                                                                                                                                       |
| <b>ADVDFGTGIADSI</b>                                            | 37,73 | 1335,656 | 13 | 0,3  | 668,8353 | 45,74 | 0        | 1 | 15720 | 150211-Fr_I_Helo-red-alk-tryp-001.raw | 5  | 5  | JAW07002.1:P86824.1                                |                                                                                  |                                                                                                                                                                       |
| <b>ADVDFGTGIADSIKE(sub K)IK</b>                                 | 37,72 | 1833,972 | 17 | 0,5  | 612,3317 | 37,92 | 0        | 1 | 12906 | 150211-Fr_I_Helo-red-alk-tryp-001.raw | 1  | 1  | JAW07002.1                                         |                                                                                  |                                                                                                                                                                       |
| <b>GREGYPADSK</b>                                               | 37,71 | 1078,504 | 10 | 0,7  | 540,2598 | 5,37  | 3,88E+07 | 1 | 1319  | 150211-Fr_I_Helo-red-alk-tryp-001.raw | 66 | 66 | AAC25688.1:O77463.1:AAC25689.1                     |                                                                                  |                                                                                                                                                                       |
| <b>APEPAPEAAPEAAPEAAPE(+17.03)</b>                              | 37,69 | 2069,991 | 22 | -0,2 | 1036,002 | 16,74 | 2,38E+09 | 1 | 5422  | 150211-Fr_I_Helo-red-alk-tryp-001.raw | 8  | 8  | JAW07022.1:P86821.1                                | Replacement of proton with ammonium ion                                          | E22:Replacement of proton with ammonium ion:41.52                                                                                                                     |
| <b>Q(sub E)DGT(sub V)DINTAGIANSAGVC(+57.02)KPC(+57.02)FK</b>    | 37,58 | 2524,169 | 24 | 1    | 842,3976 | 35,45 | 0        | 1 | 11997 | 150211-Fr_I_Helo-red-alk-tryp-001.raw | 3  | 3  | AIJ02109.2:P86392.3:V9Z9A3.1:AHE40589.1:AHE40588.1 | Carbamidomethylation                                                             | C19:Carbamidomethylation:1000.00;C22:Carbamidomethylat ion:1000.00                                                                                                    |
| <b>RLTSQS(+58.03)EYAC(+57.02)PAIDKFC(+57.02)EDHC(+57.02)AAK</b> | 37,56 | 2914,292 | 24 | -1,4 | 729,5793 | 15,09 | 0        | 1 | 4809  | 150211-Fr_I_Helo-red-alk-tryp-001.raw | 2  | 2  | P86822.2:POC8W4.2:AFP87551.1                       | 2 3-dihydro-2 2-dimethyl-7-benzofuranol N-methyl carbamate; Carbamidomethylation | S6:2 3-dihydro-2 2-dimethyl-7-benzofuranol N-methyl carbamate:0.00;C10:Carbamidomethylation:1000.00;C17:Carbamidomethylation:1000.00;C21:Carbamidomethylation:1000.00 |
| <b>EAAPEAAPEAAPEAAPE(+17.03)</b>                                | 37,52 | 1507,715 | 16 | -1   | 754,8642 | 31,34 | 0        | 1 | 10528 | 150211-Fr_I_Helo-red-alk-tryp-001.raw | 1  | 1  | JAW07022.1:P86821.1                                | Replacement of proton with ammonium ion                                          | E16:Replacement of proton with ammonium ion:55.73                                                                                                                     |
| <b>K(+42.01)(+43.99)VNEPSFIGDSAILGHQQVLDPLVK</b>                | 37,48 | 3003,555 | 27 | -3   | 751,8938 | 43,05 | 0        | 1 | 14762 | 150211-Fr_I_Helo-red-alk-tryp-001.raw | 1  | 1  | JAG85213.1                                         | Acetylation (N-term); Carboxylation (DKW)                                        | K1:Acetylation (N-term):1000.00;K1:Carboxylation (DKW):0.00                                                                                                           |
| <b>FSC(+57.02)FIRPSGFC(+57.02)DGYC(+57.02)K(-.98)(+42.01)</b>   | 37,15 | 2040,864 | 16 | -0,3 | 681,2952 | 32,27 | 0        | 1 | 10852 | 150211-Fr_I_Helo-red-alk-tryp-001.raw | 4  | 4  | COHJM9.1:JAG85185.1:CEF39517.1:P60276.1            | Carbamidomethylation; Amidation; Acetylation (K)                                 | C3:Carbamidomethylation:1000.00;C11:Carbamidomethylati on:1000.00;C15:Carbamidome thylation:1000.00;K16:Amidati on:1000.00;K16:Acetylation (K):1000.00                |

J Venom Anim Toxins incl Trop Dis, 2019

|                                                           |       |          |    |      |          |       |          |   |       |                                       |    |    |                                                                                   |                                                                                  |                                                                                                                                             |
|-----------------------------------------------------------|-------|----------|----|------|----------|-------|----------|---|-------|---------------------------------------|----|----|-----------------------------------------------------------------------------------|----------------------------------------------------------------------------------|---------------------------------------------------------------------------------------------------------------------------------------------|
| <b>ITC(+57.02)FLTAAGYC(+57.02)NTE(+53.92)C(+57.02)TLK</b> | 37,13 | 2175,873 | 18 | -1,9 | 726,2968 | 35,19 | 0        | 1 | 11905 | 150211-Fr_I_Helo-red-alk-tryp-001.raw | 3  | 3  | AAC25688.1:O77463.1:AAC25689.1                                                    | Carbamidomethylation; Replacement of 2 protons by iron                           | C3:Carbamidomethylation:100.00;C11:Carbamidomethylation:1000.00;E14:Replacement of 2 protons by iron:20.17;C15:Carbamidomethylation:1000.00 |
| <b>YYC(+57.02)NHQTGLAK</b>                                | 37,03 | 1353,614 | 11 | 2,4  | 452,2129 | 5,77  | 0        | 1 | 1448  | 150211-Fr_I_Helo-red-alk-tryp-001.raw | 1  | 1  | AIJ02109.2:P86392.3:V9Z9A3.1:AHE40589.1:AHE40588.1:JAG85220.1:AHE40596.1:V9ZAY0.1 | Carbamidomethylation                                                             | C3:Carbamidomethylation:100.00                                                                                                              |
| <b>KEALAPE(+21.98)PAPEP</b>                               | 37,03 | 1269,622 | 12 | 0,4  | 635,8183 | 30,72 | 0        | 1 | 10316 | 150211-Fr_I_Helo-red-alk-tryp-001.raw | 12 | 12 | JAW07022.1:P86821.1                                                               | Sodium adduct                                                                    | E7:Sodium adduct:11.59                                                                                                                      |
| <b>WLPLS(+75.98)GPVSGILPHEGK</b>                          | 36,9  | 1861,958 | 17 | 2,3  | 621,6614 | 19,49 | 0        | 1 | 6467  | 150211-Fr_I_Helo-red-alk-tryp-001.raw | 1  | 1  | XP_023242894.1                                                                    | EDT                                                                              | S5:EDT:21.91                                                                                                                                |
| <b>KTEPSFIKDNLIPGPPAAFDPLVLS</b>                          | 36,9  | 2780,464 | 26 | 1,5  | 927,8299 | 52,25 | 0        | 1 | 17939 | 150211-Fr_I_Helo-red-alk-tryp-001.raw | 1  | 1  | AIJ02109.2:P86392.3:V9Z9A3.1:AHE40589.1:AHE40588.1                                |                                                                                  |                                                                                                                                             |
| <b>ITC(+57.02)FLTAAGYC(+57.02)NTEC(+57.02)TL</b>          | 36,89 | 1993,858 | 17 | 0,1  | 665,6268 | 39,82 | 0        | 1 | 13594 | 150211-Fr_I_Helo-red-alk-tryp-001.raw | 7  | 7  | AAC25688.1:O77463.1:AAC25689.1                                                    | Carbamidomethylation                                                             | C3:Carbamidomethylation:100.00;C11:Carbamidomethylation:1000.00;C15:Carbamidomethylation:1000.00                                            |
| <b>TEPSFIKDNLIPGPPAAFDPLVIS(+58.03)AMSK</b>               | 36,84 | 3127,603 | 29 | -2,3 | 1043,539 | 51,08 | 0        | 1 | 17552 | 150211-Fr_I_Helo-red-alk-tryp-001.raw | 2  | 2  | AIJ02109.2:P86392.3:V9Z9A3.1:AHE40589.1:AHE40588.1                                | 2 3-dihydro-2 2-dimethyl-7-benzofuranol N-methyl carbamate                       | S25:2 3-dihydro-2 2-dimethyl-7-benzofuranol N-methyl carbamate:3.29                                                                         |
| <b>APEPAPEAAPEAAPE(+17.03)PAAAPE</b>                      | 36,73 | 2069,991 | 22 | -0,5 | 1036,002 | 24,23 | 9,80E+08 | 1 | 8193  | 150211-Fr_I_Helo-red-alk-tryp-001.raw | 15 | 15 | JAW07022.1:P86821.1                                                               | Replacement of proton with ammonium ion                                          | E15:Replacement of proton with ammonium ion:0.00                                                                                            |
| <b>AEIDFSGIPEDIK(+114.04)QI</b>                           | 36,64 | 1900,978 | 16 | 0,4  | 951,4967 | 50,18 | 1,46E+08 | 1 | 17252 | 150211-Fr_I_Helo-red-alk-tryp-001.raw | 4  | 4  | JAW06987.1:JAW07038.1:JAW06992.1                                                  | Ubiquitin                                                                        | K14:Ubiquitin:58.06                                                                                                                         |
| <b>APEAAPE(+37.96)PAAAAPE</b>                             | 36,55 | 1328,565 | 14 | -2,8 | 665,2879 | 30,67 | 0        | 1 | 10298 | 150211-Fr_I_Helo-red-alk-tryp-001.raw | 8  | 8  | JAW07022.1:P86821.1:POC8W6.1                                                      | Replacement of proton by potassium                                               | E7:Replacement of proton by potassium:68.46                                                                                                 |
| <b>AEIDFS(+58.03)GIPEDIK</b>                              | 36,53 | 1603,822 | 14 | -1,3 | 535,6139 | 41,45 | 0        | 1 | 14187 | 150211-Fr_I_Helo-red-alk-tryp-001.raw | 19 | 19 | JAW06987.1:JAW07038.1:JAW06992.1:P84190.1                                         | 2 3-dihydro-2 2-dimethyl-7-benzofuranol N-methyl carbamate                       | S6:2 3-dihydro-2 2-dimethyl-7-benzofuranol N-methyl carbamate:1000.00                                                                       |
| <b>W(sub A)EIDFSGIPEDIK</b>                               | 36,52 | 1660,835 | 14 | -0,7 | 831,4241 | 50,59 | 0        | 1 | 17387 | 150211-Fr_I_Helo-red-alk-tryp-001.raw | 5  | 5  | JAW06987.1:JAW07038.1:JAW06992.1:P84190.1                                         |                                                                                  |                                                                                                                                             |
| <b>ET(sub R)AEIDFSGIPEDIK</b>                             | 36,5  | 1775,883 | 16 | -0,6 | 888,9482 | 43,17 | 0        | 1 | 14804 | 150211-Fr_I_Helo-red-alk-tryp-001.raw | 2  | 2  | JAW06987.1:JAW07038.1:JAW06992.1                                                  |                                                                                  |                                                                                                                                             |
| <b>APEAAPEAAPEAAAAPE(+17.03)</b>                          | 36,48 | 1675,805 | 18 | -0,4 | 838,9095 | 15,32 | 8,63E+08 | 1 | 4893  | 150211-Fr_I_Helo-red-alk-tryp-001.raw | 47 | 47 | JAW07022.1:P86821.1                                                               | Replacement of proton with ammonium ion                                          | E18:Replacement of proton with ammonium ion:46.74                                                                                           |
| <b>C(+57.02)VAS(+58.03)DGFIMGDSIGENK</b>                  | 36,31 | 1856,816 | 17 | -3   | 619,944  | 31,1  | 0        | 1 | 10446 | 150211-Fr_I_Helo-red-alk-tryp-001.raw | 2  | 2  | AMO02558.1:JAW07025.1:JAW06984.1                                                  | Carbamidomethylation; 2 3-dihydro-2 2-dimethyl-7-benzofuranol N-methyl carbamate | C1:Carbamidomethylation:100.00;S4:2 3-dihydro-2 2-dimethyl-7-benzofuranol N-methyl carbamate:13.04                                          |
| <b>E(+175.04)IDFSGIPEDIK</b>                              | 36,14 | 1649,798 | 13 | 2,4  | 825,908  | 48,57 | 0        | 1 | 16702 | 150211-Fr_I_Helo-red-alk-tryp-001.raw | 1  | 1  | JAW06987.1:JAW07038.1:JAW06992.1:P84190.1                                         | Naphthalene-2 3-dicarboxaldehyde                                                 | E1:Naphthalene-2 3-dicarboxaldehyde:83.60                                                                                                   |
| <b>KGSSGYC(+57.02)AWPAC(+57.02)Y(+164.06)C(+57.02)</b>    | 36,12 | 1829,698 | 14 | 1,8  | 915,8577 | 20,49 | 0        | 1 | 6846  | 150211-Fr_I_Helo-red-alk-tryp-001.raw | 1  | 1  | AAC25688.1:O77463.1:AAC25689.1:AAW                                                | Carbamidomethylation; O-                                                         | C7:Carbamidomethylation:100.00;C12:Carbamidomethylation:100.00                                                                              |

J Venom Anim Toxins incl Trop Dis, 2019

|                                                                |       |          |    |      |          |       |          |   |       |                                           |     |     |                                                                                                                                                                         |                                                                     |                                                                                                                                                                       |
|----------------------------------------------------------------|-------|----------|----|------|----------|-------|----------|---|-------|-------------------------------------------|-----|-----|-------------------------------------------------------------------------------------------------------------------------------------------------------------------------|---------------------------------------------------------------------|-----------------------------------------------------------------------------------------------------------------------------------------------------------------------|
|                                                                |       |          |    |      |          |       |          |   |       |                                           |     |     | 72453.1:Q5G888.1:<br>AAB29128.1:P56612<br>.1:AIA81145.1:CAA4<br>6982.1:P15226.2:P0<br>DMM8.1:1NPI:1B7D:<br>AAB36321.1:AAB363<br>18.1:P56611.1:JAG8<br>5191.1:JAG85210.1 | Diisopropylphosphorylati<br>on                                      | on:1000.00;Y13:O-<br>Diisopropylphosphorylation:66<br>.25;C14:Carbamidomethylatio<br>n:1000.00                                                                        |
| <b>GIFSIDWVK</b>                                               | 36,04 | 1021,523 | 9  | -0,2 | 511,7688 | 34,25 | 0        | 1 | 11568 | 150211-Fr_I_Helo-red-<br>alk-tryp-001.raw | 7   | 7   | JAW07031.1:JAW06995.1                                                                                                                                                   |                                                                     |                                                                                                                                                                       |
| <b>FSC(+57.02)FPRPAGFC(+57.02)<br/>D(+17.03)GYC(+57.02)K</b>   | 36,03 | 1984,838 | 16 | -0,4 | 993,426  | 21,76 | 0        | 1 | 7312  | 150211-Fr_I_Helo-red-<br>alk-tryp-001.raw | 38  | 38  |                                                                                                                                                                         | Carbamidomethylation;<br>Replacement of proton<br>with ammonium ion | C3:Carbamidomethylation:100<br>0.00;C11:Carbamidomethylati<br>on:1000.00;D12:Replacement<br>of proton with ammonium<br>ion:52.86;C15:Carbamidometh<br>ylation:1000.00 |
| <b>ETNAKPPA(+21.98)</b>                                        | 36    | 848,4004 | 8  | 0,3  | 425,2076 | 5,53  | 1,44E+07 | 1 | 1366  | 150211-Fr_I_Helo-red-<br>alk-tryp-001.raw | 12  | 12  | JAW06987.1:JAW07<br>038.1:JAW06992.1:P<br>84190.1:JAW07002.<br>1                                                                                                        | Sodium adduct                                                       | A8:Sodium adduct:55.18                                                                                                                                                |
| <b>LVALIPNDQLR</b>                                             | 35,81 | 1250,735 | 11 | -1   | 626,374  | 17,3  | 0        | 1 | 5634  | 150211-Fr_I_Helo-red-<br>alk-tryp-001.raw | 1   | 1   | POC2F3.1:P69940.2:Q5G8A6.1:JAG85216.1:AAW72464.1:AAW72465.1                                                                                                             |                                                                     |                                                                                                                                                                       |
| <b>DQ(sub<br/>A)DIIMLTDRPLADISSEGK</b>                         | 35,77 | 2317,147 | 21 | -0,9 | 773,3889 | 34,37 | 7,89E+08 | 1 | 11610 | 150211-Fr_I_Helo-red-<br>alk-tryp-001.raw | 5   | 5   | AIJ02113.2                                                                                                                                                              |                                                                     |                                                                                                                                                                       |
| <b>NVLVIAPPDPSVFSDDPD</b>                                      | 35,77 | 1780,888 | 17 | 2,2  | 891,4534 | 47,39 | 0        | 1 | 16298 | 150211-Fr_I_Helo-red-<br>alk-tryp-001.raw | 1   | 1   | AIJ02118.2                                                                                                                                                              |                                                                     |                                                                                                                                                                       |
| <b>V(+27.99)NEPSFIGDS(+79.97)AI<br/>LGHQQLDPPVDLVK</b>         | 35,76 | 2897,421 | 26 | 0,5  | 966,8148 | 46,4  | 0        | 1 | 15953 | 150211-Fr_I_Helo-red-<br>alk-tryp-001.raw | 1   | 1   | JAG85213.1                                                                                                                                                              | Formylation;<br>Phosphorylation (STY)                               | V1:Formylation:32.15;S10:Pho<br>sphorylation (STY):0.00                                                                                                               |
| <b>FGC(+57.02)PAYEGYC(+57.02)<br/>N(+.98)DHC(+57.02)NDIERK</b> | 35,75 | 2504,978 | 20 | 4,9  | 627,2549 | 31,12 | 0        | 1 | 10451 | 150211-Fr_I_Helo-red-<br>alk-tryp-001.raw | 2   | 2   | POC2F3.1:P69940.2                                                                                                                                                       | Carbamidomethylation;<br>Deamidation (NQ)                           | C3:Carbamidomethylation:100<br>0.00;C10:Carbamidomethylati<br>on:1000.00;N11:Deamidation<br>(NQ):38.03;C14:Carbamidome<br>thylation:1000.00                           |
| <b>QNEPSFH(sub<br/>I)EDSAIPGHQQLDPPVDLVK</b>                   | 35,7  | 2898,415 | 26 | 2,2  | 967,1476 | 46,01 | 0        | 1 | 15818 | 150211-Fr_I_Helo-red-<br>alk-tryp-001.raw | 1   | 1   | AIJ02110.2                                                                                                                                                              |                                                                     |                                                                                                                                                                       |
| <b>APEPAPEPAPEAAPEAAPEAAA<br/>APERRR(+144.04)</b>              | 35,69 | 3059,495 | 29 | 4,2  | 1020,843 | 41,08 | 0        | 1 | 14051 | 150211-Fr_I_Helo-red-<br>alk-tryp-001.raw | 1   | 1   | JAW07022.1                                                                                                                                                              | Condensation product of<br>3-deoxyglucosone                         | R29:Condensation product of<br>3-deoxyglucosone:0.00                                                                                                                  |
| <b>APEAAPEAAPEAAAAP(+15.99)<br/>JER</b>                        | 35,66 | 1830,875 | 19 | 2,7  | 916,4471 | 14,8  | 0        | 1 | 4704  | 150211-Fr_I_Helo-red-<br>alk-tryp-001.raw | 1   | 1   | JAW07022.1                                                                                                                                                              | Oxidation or<br>Hydroxylation                                       | P17:Oxidation or<br>Hydroxylation:5.47                                                                                                                                |
| <b>S(+164.06)TQDEIQC(+57.02)EE<br/>FC(+57.02)EK</b>            | 35,64 | 1965,774 | 14 | 3,4  | 983,8975 | 31,67 | 0        | 1 | 10642 | 150211-Fr_I_Helo-red-<br>alk-tryp-001.raw | 1   | 1   | JAW07006.1                                                                                                                                                              | O-<br>Diisopropylphosphorylati<br>on;<br>Carbamidomethylation       | S1:O-<br>Diisopropylphosphorylation:0.<br>00;C8:Carbamidomethylation:<br>1000.00;C12:Carbamidometh<br>ylation:1000.00                                                 |
| <b>ADVDFGTIADS</b>                                             | 35,55 | 1109,488 | 11 | -1,5 | 555,7503 | 18,3  | 4,64E+08 | 1 | 6013  | 150211-Fr_I_Helo-red-<br>alk-tryp-001.raw | 108 | 108 | JAW07002.1:P86824.1                                                                                                                                                     |                                                                     |                                                                                                                                                                       |
| <b>IYIGTVFVQQTMMMDTLK</b>                                      | 35,4  | 2088,064 | 18 | -1,2 | 1045,038 | 50,27 | 0        | 1 | 17281 | 150211-Fr_I_Helo-red-<br>alk-tryp-001.raw | 1   | 1   | AMO02558.1:JAW07025.1:JAW06984.1                                                                                                                                        |                                                                     |                                                                                                                                                                       |

J Venom Anim Toxins incl Trop Dis, 2019

|                                                                                |       |          |    |      |          |       |          |   |       |                                       |    |    |                                                             |                                                                                  |                                                                                                                                                                                |
|--------------------------------------------------------------------------------|-------|----------|----|------|----------|-------|----------|---|-------|---------------------------------------|----|----|-------------------------------------------------------------|----------------------------------------------------------------------------------|--------------------------------------------------------------------------------------------------------------------------------------------------------------------------------|
| V(+104.03)NEPSFIGDSAILGHQ<br>QVLDPVDLVK                                        | 35,32 | 2893,486 | 26 | -2,2 | 724,3772 | 46,19 | 0        | 1 | 15881 | 150211-Fr_I_Helo-red-alk-tryp-001.raw | 1  | 1  | JAG85213.1                                                  | Benzoyl                                                                          | V1:Benzoyl:39.42                                                                                                                                                               |
| VC(+57.02)DY PANVK                                                             | 35,3  | 1064,496 | 9  | -1,3 | 533,2546 | 5,88  | 0        | 1 | 1485  | 150211-Fr_I_Helo-red-alk-tryp-001.raw | 1  | 1  |                                                             | Carbamidomethylation                                                             | C2:Carbamidomethylation:1000.00                                                                                                                                                |
| EALAPEPAPEPAPE(+17.03)P                                                        | 35,19 | 1530,757 | 15 | -0,8 | 766,3849 | 34,15 | 3,88E+08 | 1 | 11532 | 150211-Fr_I_Helo-red-alk-tryp-001.raw | 10 | 10 | JAW07022.1:P86821.1                                         | Replacement of proton with ammonium ion                                          | E14:Replacement of proton with ammonium ion:0.00                                                                                                                               |
| LTSQS(+58.03)EYAC(+57.02)PA<br>IDKFC(+57.02)EDHC(+57.02)AA<br>K                | 35,17 | 2758,191 | 23 | -3,4 | 690,5527 | 17,13 | 0        | 1 | 5569  | 150211-Fr_I_Helo-red-alk-tryp-001.raw | 4  | 4  | P86822.2:POC8W4.2:AFP87551.1                                | 2 3-dihydro-2 2-dimethyl-7-benzofuranol N-methyl carbamate; Carbamidomethylation | S5:2 3-dihydro-2 2-dimethyl-7-benzofuranol N-methyl carbamate:5.99;C9:Carbamido methylation:1000.00;C16:Carb amidomethylation:1000.00;C20:Carbamidomethylation:1000.00         |
| ADVDFGTGIADSIIP(sub K)K                                                        | 35,17 | 1560,804 | 15 | -0,3 | 781,4088 | 45,74 | 0        | 1 | 15722 | 150211-Fr_I_Helo-red-alk-tryp-001.raw | 2  | 2  | JAW07002.1                                                  |                                                                                  |                                                                                                                                                                                |
| AEIDFSGIPED                                                                    | 35,12 | 1191,53  | 11 | 0,2  | 596,7722 | 32,43 | 5,48E+08 | 1 | 10909 | 150211-Fr_I_Helo-red-alk-tryp-001.raw | 90 | 90 | JAW06987.1:JAW07038.1:JAW06992.1:P84190.1                   |                                                                                  |                                                                                                                                                                                |
| SEYAC(+57.02)PAIDK                                                             | 35,07 | 1152,512 | 10 | -0,8 | 577,2629 | 5,91  | 0        | 1 | 1494  | 150211-Fr_I_Helo-red-alk-tryp-001.raw | 2  | 2  | P86822.2:POC8W4.2:AFP87551.1:Q0GY42.1:ABE98265.1:JAG85223.1 | Carbamidomethylation                                                             | C5:Carbamidomethylation:1000.00                                                                                                                                                |
| LAPEPAPE(+37.96)PAPEPAPEA                                                      | 34,99 | 1719,776 | 17 | -1,4 | 860,894  | 33,89 | 0        | 1 | 11437 | 150211-Fr_I_Helo-red-alk-tryp-001.raw | 1  | 1  | JAW07022.1:P86821.1                                         | Replacement of proton by potassium                                               | E8:Replacement of proton by potassium:9.95                                                                                                                                     |
| SDVTGGFPVNSNNC(+57.02)IYP<br>C(+57.02)Y(-94.04)STQDEIQC(+57.02)EEFC(+57.02)EKL | 34,79 | 3965,649 | 34 | -2,9 | 1322,887 | 44,6  | 0        | 1 | 15319 | 150211-Fr_I_Helo-red-alk-tryp-001.raw | 4  | 4  | JAW07006.1                                                  | Carbamidomethylation; Dehydroalanine (Y)                                         | C14:Carbamidomethylation:1000.00;C18:Carbamidomethylat ion:1000.00;Y19:Dehydroalani ne (Y):6.63;C27:Carbamidomethyl ation:1000.00;C31:Carbamido methylation:1000.00            |
| ETRPITSWHTIGIL                                                                 | 34,79 | 1622,878 | 14 | -0,7 | 541,9662 | 36,12 | 0        | 1 | 12241 | 150211-Fr_I_Helo-red-alk-tryp-001.raw | 1  | 1  | JAW07031.1:JAW06995.1                                       |                                                                                  |                                                                                                                                                                                |
| EPAPEPAPEPAPEAAPEAPEPA<br>AAAP(+31.99)ERRR                                     | 34,76 | 3173,538 | 31 | 1,1  | 794,3926 | 40,2  | 0        | 1 | 13732 | 150211-Fr_I_Helo-red-alk-tryp-001.raw | 1  | 1  | JAW07022.1                                                  | Dihydroxy                                                                        | P27:Dihydroxy:0.00                                                                                                                                                             |
| TQFGC(+57.02)PAYEGYC(+57.02)N(+.98)DHC(+57.02)N(+.98)D<br>IER(-.98)            | 34,74 | 2605,99  | 21 | 5,1  | 1304,009 | 20,95 | 0        | 1 | 7016  | 150211-Fr_I_Helo-red-alk-tryp-001.raw | 2  | 2  | POC2F3.1:P69940.2                                           | Carbamidomethylation; Deamidation (NQ); Amidation                                | C5:Carbamidomethylation:1000.00;C12:Carbamidomethylati on:1000.00;N13:Deamidation (NQ):0.00;C16:Carbamidomet hylation:1000.00;N17:Deamid ation (NQ):0.00;R21:Amidation:1000.00 |
| TLAN(sub T)DDQCIVIEILSVTDK                                                     | 34,68 | 2089,061 | 19 | 0,1  | 697,3611 | 48,8  | 0        | 1 | 16780 | 150211-Fr_I_Helo-red-alk-tryp-001.raw | 1  | 1  | AIJ02113.2                                                  |                                                                                  |                                                                                                                                                                                |
| FFT(+164.06)LPQASC(+57.02)LR                                                   | 34,67 | 1502,736 | 11 | 4,5  | 501,9214 | 37,91 | 0        | 1 | 12900 | 150211-Fr_I_Helo-red-alk-tryp-001.raw | 2  | 2  | JAW07039.1                                                  | O- Diisopropylphosphorylati on; Carbamidomethylation                             | T3:O- Diisopropylphosphorylation:0.00;C9:Carbamidomethylation:1000.00                                                                                                          |

J Venom Anim Toxins incl Trop Dis, 2019

|                                                                      |       |          |    |      |          |       |          |   |   |       |                                       |    |    |                                             |                                                                                  |                                                                                                                                                                               |
|----------------------------------------------------------------------|-------|----------|----|------|----------|-------|----------|---|---|-------|---------------------------------------|----|----|---------------------------------------------|----------------------------------------------------------------------------------|-------------------------------------------------------------------------------------------------------------------------------------------------------------------------------|
| <b>PSFIEDSAIPGHQQVLDVLDVK(+14.02)NMAK(+42.01)</b>                    | 34,63 | 3003,538 | 27 | -0,1 | 1002,186 | 43,74 |          | 0 | 1 | 15010 | 150211-Fr_I_Helo-red-alk-tryp-001.raw | 3  | 3  | AIJ02110.2                                  | Methylation(KR); Acetylation (K)                                                 | K23:Methylation(KR):0.00;K27: Acetylation (K):0.00                                                                                                                            |
| <b>EALAPEPAPE(+17.03)PAPEP</b>                                       | 34,63 | 1530,757 | 15 | -1,1 | 766,3846 | 32,69 |          | 0 | 1 | 11004 | 150211-Fr_I_Helo-red-alk-tryp-001.raw | 41 | 41 | JAW07022.1:P86821.1                         | Replacement of proton with ammonium ion                                          | E10:Replacement of proton with ammonium ion:19.58                                                                                                                             |
| <b>EPAPEAAPEAAPEAAAAPER(+28.03)</b>                                  | 34,54 | 2069,006 | 21 | -0,5 | 1035,51  | 15,01 |          | 0 | 1 | 4781  | 150211-Fr_I_Helo-red-alk-tryp-001.raw | 10 | 10 | JAW07022.1                                  | Dimethylation(KR)                                                                | R21:Dimethylation(KR):1000.00                                                                                                                                                 |
| <b>S(+58.03)QIENEAVGLALGGGAC(+57.02)LTC(+57.02)EK</b>                | 34,42 | 2334,107 | 22 | -4,3 | 779,0396 | 36,76 |          | 0 | 1 | 12476 | 150211-Fr_I_Helo-red-alk-tryp-001.raw | 1  | 1  | AIJ02111.3                                  | 2 3-dihydro-2 2-dimethyl-7-benzofuranol N-methyl carbamate; Carbamidomethylation | S1:2 3-dihydro-2 2-dimethyl-7-benzofuranol N-methyl carbamate:1000.00;C17:Carbamidomethylation:1000.00;C20:Carbamidomethylation:1000.00                                       |
| <b>PAPEPAPEPAPEAAPEAAPEAAAPERR(+160.04)R</b>                         | 34,41 | 3172,542 | 30 | -2,5 | 1587,274 | 41,23 |          | 0 | 1 | 14108 | 150211-Fr_I_Helo-red-alk-tryp-001.raw | 2  | 2  | JAW07022.1                                  | Condensation product of glucosone                                                | R29:Condensation product of glucosone:0.00                                                                                                                                    |
| <b>TDQALTEYVTQMYT(+42.01)GVQNMYYDTMNLK</b>                           | 34,3  | 3341,514 | 28 | 4,7  | 1114,851 | 53,62 |          | 0 | 1 | 18386 | 150211-Fr_I_Helo-red-alk-tryp-001.raw | 1  | 1  | JAW07039.1                                  | Acetylation (TSCYH)                                                              | T14:Acetylation (TSCYH):0.00                                                                                                                                                  |
| <b>EPAPEPAPEAAPEAAPEAAAAPER(+14.02)R(-.98)</b>                       | 34,18 | 2604,293 | 26 | -3,7 | 1303,149 | 37,28 |          | 0 | 1 | 12669 | 150211-Fr_I_Helo-red-alk-tryp-001.raw | 1  | 1  | JAW07022.1                                  | Methylation(KR); Amidation                                                       | R25:Methylation(KR):1000.00; R26:Amidation:1000.00                                                                                                                            |
| <b>EPAPEPAPEPAPEAAPEAAPEAAAAPER(+31.99)RR</b>                        | 33,98 | 3173,538 | 31 | -0,5 | 1587,775 | 40,63 |          | 0 | 1 | 13887 | 150211-Fr_I_Helo-red-alk-tryp-001.raw | 2  | 2  | JAW07022.1                                  | Dihydroxy                                                                        | R29:Dihydroxy:0.00                                                                                                                                                            |
| <b>DAPPLN(sub D)LPQ(sub D)GVGFK</b>                                  | 33,95 | 1451,777 | 14 | -0,6 | 726,8954 | 36,18 |          | 0 | 1 | 12261 | 150211-Fr_I_Helo-red-alk-tryp-001.raw | 5  | 5  | XP_023239442.1                              |                                                                                  |                                                                                                                                                                               |
| <b>AEIDFSGIPEDI</b>                                                  | 33,95 | 1417,698 | 13 | -0,3 | 709,8559 | 47,03 | 7,20E+08 | 1 | 1 | 16173 | 150211-Fr_I_Helo-red-alk-tryp-001.raw | 9  | 9  | JAW06987.1:JAW07038.1:JAW06992.1:P84190.1   |                                                                                  |                                                                                                                                                                               |
| <b>AEIDFSGIPEDIK(+43.01)QIK(+14.02)</b>                              | 33,89 | 1972,052 | 17 | -0,8 | 658,3573 | 47,73 |          | 0 | 1 | 16415 | 150211-Fr_I_Helo-red-alk-tryp-001.raw | 1  | 1  | JAW06987.1:JAW07038.1:JAW06992.1            | Carbamylation; Methylation(KR)                                                   | K14:Carbamylation:0.00;K17: Methylation(KR):0.00                                                                                                                              |
| <b>C(+57.02)K(+172.05)ITC(+57.02)FLTAAGYC(+57.02)NTEC(+57.02)TLK</b> | 33,8  | 2582,131 | 20 | 4,9  | 861,7219 | 36,41 |          | 0 | 1 | 12345 | 150211-Fr_I_Helo-red-alk-tryp-001.raw | 1  | 1  | AAC25688.1:O77463.1: AAC25689.1             | Carbamidomethylation; Menadione hydroquinone derivative                          | C1:Carbamidomethylation:1000.00;K2:Menadione hydroquinone derivative:100.77;C5:Carbamidomethylation:1000.00;C13:Carbamidomethylation:1000.00;C17:Carbamidomethylation:1000.00 |
| <b>ET(+79.97)NAKPP(+31.99)AR</b>                                     | 33,78 | 1094,476 | 9  | -1   | 548,2446 | 5,69  |          | 0 | 1 | 1418  | 150211-Fr_I_Helo-red-alk-tryp-001.raw | 3  | 3  | JAW06987.1:JAW07038.1:JAW06992.1:JAW07002.1 | Phosphorylation (STY); Dihydroxy                                                 | T2:Phosphorylation (STY):1000.00;P7:Dihydroxy:0.00                                                                                                                            |
| <b>EPAPEAAPEAAPEAAAAPER(+453.21)</b>                                 | 33,75 | 2806,39  | 23 | -1,9 | 936,4688 | 42,4  |          | 0 | 1 | 14531 | 150211-Fr_I_Helo-red-alk-tryp-001.raw | 2  | 2  | JAW07022.1                                  | Puromycin                                                                        | R23:Puromycin:1000.00                                                                                                                                                         |
| <b>EPAAAAPE(+43.99)AAPE</b>                                          | 33,7  | 1166,509 | 12 | -2,2 | 584,2605 | 21,44 |          | 0 | 1 | 7197  | 150211-Fr_I_Helo-red-alk-tryp-001.raw | 55 | 55 | POC8W6.1                                    | Carboxylation (E)                                                                | E8:Carboxylation (E):16.51                                                                                                                                                    |
| <b>E(-18.01)IDFSGIPEDIKQ</b>                                         | 33,59 | 1584,804 | 14 | 2,1  | 793,4106 | 46,67 |          | 0 | 1 | 16048 | 150211-Fr_I_Helo-red-alk-tryp-001.raw | 1  | 1  | JAW06987.1:JAW07038.1:JAW06992.1            | Pyro-glu from E                                                                  | E1:Pyro-glu from E:1000.00                                                                                                                                                    |
| <b>AEIDFSGIPED(+21.98)</b>                                           | 33,23 | 1213,512 | 11 | 0,5  | 607,7633 | 33,21 |          | 0 | 1 | 11191 | 150211-Fr_I_Helo-red-alk-tryp-001.raw | 3  | 3  | JAW06987.1:JAW07038.1:JAW06992.1:P84190.1   | Sodium adduct                                                                    | D11:Sodium adduct:0.00                                                                                                                                                        |
| <b>S(+59.02)SGYC(+57.02)AWPAC(+57.02)YC(+57.02)YGLPNWVK</b>          | 33,2  | 2497,048 | 20 | 0,1  | 833,3566 | 49,06 |          | 0 | 1 | 16869 | 150211-Fr_I_Helo-red-alk-tryp-001.raw | 1  | 1  | AAW72453.1:Q5G8B8.1:AAB29128.1:P56          | Aminoethylcysteine; Carbamidomethylation                                         | S1:Aminoethylcysteine:0.00;C5:Carbamidomethylation:1000.00                                                                                                                    |



J Venom Anim Toxins incl Trop Dis, 2019

|                                                             |       |          |    |      |          |       |          |   |       |                                       |     |     |                                                                                                               |                                                                  |                                                                                                                                                       |
|-------------------------------------------------------------|-------|----------|----|------|----------|-------|----------|---|-------|---------------------------------------|-----|-----|---------------------------------------------------------------------------------------------------------------|------------------------------------------------------------------|-------------------------------------------------------------------------------------------------------------------------------------------------------|
|                                                             |       |          |    |      |          |       |          |   |       |                                       |     |     | 612.1:AIA81145.1:CAA46982.1:P15226.2:PODMM8.1:1NPI:1B7D:AAB36321.1:AA B36318.1:P56611.1:JAG85191.1:JAG85210.1 |                                                                  | .00;C10:Carbamidomethylation:1000.00;C12:Carbamidomethylation:1000.00                                                                                 |
| <b>QIGIFDSK</b>                                             | 33,16 | 906,4811 | 8  | 0,5  | 454,248  | 28,88 | 0        | 1 | 9709  | 150211-Fr_I_Helo-red-alk-tryp-001.raw | 13  | 13  | AMO02558.1:JAW07025.1:JAW06984.1                                                                              |                                                                  |                                                                                                                                                       |
| <b>APEAAPEPAAAAPER(+212.01)RR</b>                           | 33,13 | 2127,022 | 18 | -2,5 | 1064,516 | 17,25 | 0        | 1 | 5615  | 150211-Fr_I_Helo-red-alk-tryp-001.raw | 6   | 6   | JAW07022.1                                                                                                    | phosphate-ribosylation                                           | R15:phosphate-ribosylation:0.00                                                                                                                       |
| <b>PEAAPEAAPEPAAAAP(+15.99)ER</b>                           | 33,04 | 1759,838 | 18 | 3,4  | 880,9291 | 14,25 | 0        | 1 | 4502  | 150211-Fr_I_Helo-red-alk-tryp-001.raw | 6   | 6   | JAW07022.1                                                                                                    | Oxidation or Hydroxylation                                       | P16:Oxidation or Hydroxylation:0.00                                                                                                                   |
| <b>PEPAPEPAPEPAAPEAAPEPAAAAPE(+129.04)RR</b>                | 32,99 | 3211,542 | 31 | -1   | 1606,777 | 43,64 | 0        | 1 | 14974 | 150211-Fr_I_Helo-red-alk-tryp-001.raw | 1   | 1   | JAW07022.1                                                                                                    | Monoglutamyl                                                     | E29:Monoglutamyl:2.90                                                                                                                                 |
| <b>PEAAPEAAPEPAAAAPERR</b>                                  | 32,94 | 1899,944 | 19 | -4,5 | 950,9749 | 17,59 | 0        | 1 | 5745  | 150211-Fr_I_Helo-red-alk-tryp-001.raw | 1   | 1   | JAW07022.1                                                                                                    |                                                                  |                                                                                                                                                       |
| <b>ADVFTGIAD(+21.98)S</b>                                   | 32,93 | 1131,47  | 11 | 0,1  | 566,7421 | 33,34 | 0        | 1 | 11236 | 150211-Fr_I_Helo-red-alk-tryp-001.raw | 6   | 6   | JAW07002.1:P86824.1                                                                                           | Sodium adduct                                                    | D10:Sodium adduct:20.00                                                                                                                               |
| <b>AEIDFSGIPEDIK(+71.04)EIK</b>                             | 32,89 | 1987,051 | 17 | -0,4 | 663,3574 | 48,76 | 0        | 1 | 16768 | 150211-Fr_I_Helo-red-alk-tryp-001.raw | 1   | 1   | P84190.1                                                                                                      | Propionamide (K X@N-term)                                        | K14:Propionamide (K X@N-term):6.63                                                                                                                    |
| <b>ALAPEPAPEPAAPEAAPEAAPEPAAAAPE</b>                        | 32,86 | 3025,456 | 32 | 0,7  | 757,3717 | 40,46 | 0        | 1 | 13827 | 150211-Fr_I_Helo-red-alk-tryp-001.raw | 1   | 1   | JAW07022.1:P86821.1                                                                                           |                                                                  |                                                                                                                                                       |
| <b>T(+298.19)C(+57.02)FLTAAGYC(+57.02)NTEC(+57.02)TLK</b>   | 32,2  | 2307,063 | 17 | 2,8  | 770,0303 | 21,26 | 0        | 1 | 7130  | 150211-Fr_I_Helo-red-alk-tryp-001.raw | 1   | 1   | AAC25688.1:O77463.1:AA25689.1                                                                                 | Levuglandinyl-lysine anhydropyrrole adduct; Carbamidomethylation | T1:Levuglandinyl-lysine anhydropyrrole adduct:92.02;C2:Carbamidomethylation:1000.00;C10:Carbamidomethylation:1000.00;C14:Carbamidomethylation:1000.00 |
| <b>IDFSGIPEDIKEI</b>                                        | 32,38 | 1587,84  | 14 | -0,2 | 794,9268 | 50,16 | 0        | 1 | 17245 | 150211-Fr_I_Helo-red-alk-tryp-001.raw | 2   | 2   | P84190.1                                                                                                      |                                                                  |                                                                                                                                                       |
| <b>KETNAKPPA</b>                                            | 32,32 | 954,5134 | 9  | 0    | 478,264  | 5,2   | 2,06E+08 | 1 | 1266  | 150211-Fr_I_Helo-red-alk-tryp-001.raw | 125 | 125 | JAW06987.1:JAW07038.1:JAW06992.1:P84190.1:JAW07002.1                                                          |                                                                  |                                                                                                                                                       |
| <b>AEIDFSGIPEDI</b>                                         | 32,2  | 1304,614 | 12 | 0    | 653,314  | 42,54 | 0        | 1 | 14579 | 150211-Fr_I_Helo-red-alk-tryp-001.raw | 13  | 13  | JAW06987.1:JAW07038.1:JAW06992.1:P84190.1                                                                     |                                                                  |                                                                                                                                                       |
| <b>M(sub A)M(ins)EIDFSGIPEDIK</b>                           | 32,18 | 1736,836 | 15 | -0,8 | 869,4248 | 47,67 | 0        | 1 | 16395 | 150211-Fr_I_Helo-red-alk-tryp-001.raw | 1   | 1   | P84190.1                                                                                                      |                                                                  |                                                                                                                                                       |
| <b>Q(sub A)SSGYC(+57.02)AWPAC(+57.02)YC(+57.02)YGVDPDIK</b> | 32,11 | 2518,05  | 21 | -0,9 | 840,3566 | 36,88 | 4,81E+09 | 1 | 12520 | 150211-Fr_I_Helo-red-alk-tryp-001.raw | 1   | 1   | JAW07016.1:JAW06979.1:P68411.1:1913435A:P68410.1:AA B36322.1                                                  | Carbamidomethylation                                             | C6:Carbamidomethylation:1000.00;C11:Carbamidomethylation:1000.00;C13:Carbamidomethylation:1000.00                                                     |
| <b>ITC(+57.02)FLT(+59.02)AAGYC(+57.02)NTEC(+57.02)TLK</b>   | 32,08 | 2180,973 | 18 | 1,9  | 1091,496 | 35,31 | 0        | 1 | 11946 | 150211-Fr_I_Helo-red-alk-tryp-001.raw | 1   | 1   | AAC25688.1:O77463.1:AA25689.1                                                                                 | Carbamidomethylation; Aminoethylcysteine                         | C3:Carbamidomethylation:1000.00;T6:Aminoethylcysteine:32.48;C11:Carbamidomethylation:1000.00;C15:Carbamidomethylation:1000.00                         |

J Venom Anim Toxins incl Trop Dis, 2019

|                                                          |       |          |    |      |          |       |   |   |       |                                       |    |    |                                           |                                                                                  |                                                                                                                                        |
|----------------------------------------------------------|-------|----------|----|------|----------|-------|---|---|-------|---------------------------------------|----|----|-------------------------------------------|----------------------------------------------------------------------------------|----------------------------------------------------------------------------------------------------------------------------------------|
| PAPEAAPEAAPEAAAAPEERRR(+380.15)                          | 32,06 | 2604,282 | 22 | -0,8 | 1303,147 | 37    | 0 | 1 | 12566 | 150211-Fr_I_Helo-red-alk-tryp-001.raw | 3  | 3  | JAW07022.1                                | Nucleophilic addition to cytopiloyne+H2O                                         | R22:Nucleophilic addition to cytopiloyne+H2O:14.04                                                                                     |
| QNIQ(sub E)PY(sub S)FIEDSAIPGHQQVLDPLVVK                 | 32,06 | 2949,487 | 26 | 3    | 738,3813 | 46,46 | 0 | 1 | 15976 | 150211-Fr_I_Helo-red-alk-tryp-001.raw | 1  | 1  | AIJ02110.2                                |                                                                                  |                                                                                                                                        |
| APEPAPEAAPEPVAAAAPER                                     | 32,05 | 1939,964 | 20 | -0,8 | 970,9885 | 33,13 | 0 | 1 | 11162 | 150211-Fr_I_Helo-red-alk-tryp-001.raw | 1  | 1  | JAG85215.1                                |                                                                                  |                                                                                                                                        |
| QIKET(+114.04)NAKPPA                                     | 32,05 | 1309,699 | 11 | -1,5 | 655,8558 | 5,78  | 0 | 1 | 1449  | 150211-Fr_I_Helo-red-alk-tryp-001.raw | 1  | 1  | JAW06987.1:JAW07038.1:JAW06992.1          | Ubiquitin                                                                        | T5:Ubiquitin:9.40                                                                                                                      |
| KLDELQDDGTVAAYNTAGIS(+58.03)LGSGVC(+57.02)K              | 32,03 | 2710,336 | 26 | -1,3 | 1356,173 | 36,04 | 0 | 1 | 12212 | 150211-Fr_I_Helo-red-alk-tryp-001.raw | 1  | 1  | AIJ02110.2:JAG85213.1                     | 2 3-dihydro-2 2-dimethyl-7-benzofuranol N-methyl carbamate; Carbamidomethylation | S19:2 3-dihydro-2 2-dimethyl-7-benzofuranol N-methyl carbamate:47.09;C25:Carbamidomethylation:1000.00                                  |
| LVGILFYDILR                                              | 32,03 | 1320,781 | 11 | 0,3  | 661,3977 | 50,25 | 0 | 1 | 17274 | 150211-Fr_I_Helo-red-alk-tryp-001.raw | 1  | 1  | JAW07019.1:JAW06978.1                     |                                                                                  |                                                                                                                                        |
| S(+58.03)PC(+57.02)IIIDYLC(+57.02)VTETTFTER              | 32    | 2375,126 | 19 | -3,3 | 792,7134 | 51,7  | 0 | 1 | 17757 | 150211-Fr_I_Helo-red-alk-tryp-001.raw | 1  | 1  | AIJ02110.2                                | 2 3-dihydro-2 2-dimethyl-7-benzofuranol N-methyl carbamate; Carbamidomethylation | S1:2 3-dihydro-2 2-dimethyl-7-benzofuranol N-methyl carbamate:1000.00;C3:Carbamidomethylation:1000.00;C10:Carbamidomethylation:1000.00 |
| AEIDFSGIPEDIK(+162.08)EIK                                | 31,82 | 2078,095 | 17 | -4,1 | 1040,051 | 46,75 | 0 | 1 | 16077 | 150211-Fr_I_Helo-red-alk-tryp-001.raw | 1  | 1  | P84190.1                                  | O-Pinacolylmethylphosphorylation                                                 | K14:O-Pinacolylmethylphosphorylation:9.42                                                                                              |
| APEPAPEPAPE(+21.98)PAPEA                                 | 31,82 | 1590,718 | 16 | -0,1 | 796,366  | 32,29 | 0 | 1 | 10862 | 150211-Fr_I_Helo-red-alk-tryp-001.raw | 1  | 1  | JAW07022.1:P86821.1:POC8W6.1              | Sodium adduct                                                                    | E11:Sodium adduct:33.58                                                                                                                |
| DW(sub A)DIIMLTDRPLADISSEGK                              | 31,78 | 2375,168 | 21 | 1    | 792,7307 | 35,72 | 0 | 1 | 12094 | 150211-Fr_I_Helo-red-alk-tryp-001.raw | 1  | 1  | AIJ02113.2                                |                                                                                  |                                                                                                                                        |
| D(-15.01)SAIPGHQQVLDPLVVK                                | 31,7  | 1915,005 | 18 | -1,7 | 958,5082 | 49,35 | 0 | 1 | 16971 | 150211-Fr_I_Helo-red-alk-tryp-001.raw | 1  | 1  | AIJ02110.2                                | ISD (z+2)-series                                                                 | D1:ISD (z+2)-series:1000.00                                                                                                            |
| TFDC(+57.02)SNGPWLSTV                                    | 31,67 | 1597,672 | 14 | 3,6  | 799,8461 | 39,96 | 0 | 1 | 13644 | 150211-Fr_I_Helo-red-alk-tryp-001.raw | 3  | 3  | JAW07006.1                                | Carbamidomethylation                                                             | C4:Carbamidomethylation:1000.00                                                                                                        |
| EPAPEPAPEAAPEAAPEAAAAPEERR(-.98)(+14.02)                 | 31,48 | 2604,293 | 26 | -4,9 | 1303,147 | 37,51 | 0 | 1 | 12752 | 150211-Fr_I_Helo-red-alk-tryp-001.raw | 1  | 1  | JAW07022.1                                | Amidation; Methylation(KR)                                                       | R26:Amidation:1000.00;R26:Methylation(KR):0.00                                                                                         |
| EIKETNAKPPA                                              | 31,48 | 1196,64  | 11 | -2,5 | 599,3258 | 9,98  | 0 | 1 | 2974  | 150211-Fr_I_Helo-red-alk-tryp-001.raw | 2  | 2  | P84190.1                                  |                                                                                  |                                                                                                                                        |
| AEIDFS(+114.04)GIPEDIK                                   | 31,41 | 1659,835 | 14 | -0,6 | 830,9245 | 47    | 0 | 1 | 16164 | 150211-Fr_I_Helo-red-alk-tryp-001.raw | 6  | 6  | JAW06987.1:JAW07038.1:JAW06992.1:P84190.1 | Ubiquitin                                                                        | S6:Ubiquitin:32.01                                                                                                                     |
| LTSKSE(+129.04)YAC(+57.02)PVIDKFC(+57.02)EDHC(+57.02)AAK | 31,39 | 2857,272 | 23 | 0    | 572,4617 | 14,94 | 0 | 1 | 4756  | 150211-Fr_I_Helo-red-alk-tryp-001.raw | 3  | 3  | Q0GY43.1:ABE98264.1                       | Monoglutamyl; Carbamidomethylation                                               | E6:Monoglutamyl:56.41;C9:Carbamidomethylation:1000.00;C16:Carbamidomethylation:1000.00;C20:Carbamidomethylation:1000.00                |
| IW(+31.99)TSETNK                                         | 31,37 | 1009,472 | 8  | 0,3  | 505,7432 | 5,8   | 0 | 1 | 1456  | 150211-Fr_I_Helo-red-alk-tryp-001.raw | 30 | 30 | AAC25688.1:O77463.1:AA25689.1             | Dihydroxy                                                                        | W2:Dihydroxy:53.33                                                                                                                     |
| APEPAPEAAPEAAPEPA                                        | 31,37 | 1613,757 | 17 | -0,2 | 807,8857 | 32,22 | 0 | 1 | 10834 | 150211-Fr_I_Helo-red-alk-tryp-001.raw | 3  | 3  | JAW07022.1:P86821.1                       |                                                                                  |                                                                                                                                        |

J Venom Anim Toxins incl Trop Dis, 2019

|                                                          |       |          |    |      |          |       |          |   |       |                                       |    |    |                                                    |                                                            |                                                                                                                                    |
|----------------------------------------------------------|-------|----------|----|------|----------|-------|----------|---|-------|---------------------------------------|----|----|----------------------------------------------------|------------------------------------------------------------|------------------------------------------------------------------------------------------------------------------------------------|
| TQFGC(+57.02)PAYEGY(+44.99)C(+57.02)NNHC(+57.02)QDIER    | 31,27 | 2663,023 | 21 | 0,9  | 888,6822 | 24,17 | 0        | 1 | 8173  | 150211-Fr_I_Helo-red-alk-tryp-001.raw | 9  | 9  | Q5G8A6.1:JAG85216.1:AAW72464.1:AAW72465.1          | Carbamidomethylation; Oxidation to nitro                   | C5:Carbamidomethylation:100.00;Y11:Oxidation to nitro:19.05;C12:Carbamidomethylation:1000.00;C16:Carbamidomethylation:1000.00      |
| YC(+57.02)YGLPDSVK                                       | 31,23 | 1200,549 | 10 | -1   | 601,2809 | 31,65 | 0        | 1 | 10633 | 150211-Fr_I_Helo-red-alk-tryp-001.raw | 1  | 1  | AAC25688.1:O77463.1:AAW72465.1                     | Carbamidomethylation                                       | C2:Carbamidomethylation:100.00                                                                                                     |
| EALAPEPAP                                                | 31,18 | 893,4494 | 9  | 0,2  | 447,7321 | 30,51 | 0        | 1 | 10243 | 150211-Fr_I_Helo-red-alk-tryp-001.raw | 1  | 1  | JAW07022.1:P86821.1:POC8W6.1                       |                                                            |                                                                                                                                    |
| AEIDFS(+58.03)GIPEDIKQIK                                 | 31,05 | 1973,059 | 17 | -2,7 | 987,5344 | 46,85 | 0        | 1 | 16111 | 150211-Fr_I_Helo-red-alk-tryp-001.raw | 6  | 6  | JAW06987.1:JAW07038.1:JAW06992.1                   | 2 3-dihydro-2 2-dimethyl-7-benzofuranol N-methyl carbamate | S6:2 3-dihydro-2 2-dimethyl-7-benzofuranol N-methyl carbamate:1000.00                                                              |
| KEALAPEPAP                                               | 31,02 | 1021,544 | 10 | 0    | 511,7794 | 20,36 | 0        | 1 | 6795  | 150211-Fr_I_Helo-red-alk-tryp-001.raw | 78 | 78 | JAW07022.1:P86821.1:POC8W6.1                       |                                                            |                                                                                                                                    |
| FKTNEALTEYVTQ(+.98)MFTGVQNMYPDITM(+15.99)NLDIKI          | 30,73 | 3674,72  | 31 | -0,1 | 735,9511 | 49,59 | 0        | 1 | 17053 | 150211-Fr_I_Helo-red-alk-tryp-001.raw | 1  | 1  | JAG85190.1                                         | Deamidation (NQ); Oxidation (M)                            | Q13:Deamidation (NQ):0.00;M25:Oxidation (M):3.11                                                                                   |
| Q(sub A)EIDFSGIPEDIKEI                                   | 30,72 | 1844,941 | 16 | -0,6 | 923,4771 | 51,2  | 0        | 1 | 17592 | 150211-Fr_I_Helo-red-alk-tryp-001.raw | 3  | 3  | P84190.1                                           |                                                            |                                                                                                                                    |
| AEIDFSGIPEDIKE(-.98)                                     | 30,71 | 1673,851 | 15 | 1,2  | 837,9338 | 67,33 | 4,64E+06 | 1 | 22808 | 150211-Fr_I_Helo-red-alk-tryp-001.raw | 36 | 36 | P84190.1                                           | Amidation                                                  | E15:Amidation:1000.00                                                                                                              |
| ALAPEPAPEP                                               | 30,69 | 990,5021 | 10 | 0,1  | 496,2584 | 31,36 | 0        | 1 | 10534 | 150211-Fr_I_Helo-red-alk-tryp-001.raw | 3  | 3  | JAW07022.1:P86821.1                                |                                                            |                                                                                                                                    |
| E(+27.99)ALAPEPAPEPAPEPA                                 | 30,68 | 1612,762 | 16 | -1,2 | 807,3873 | 21,44 | 0        | 1 | 7198  | 150211-Fr_I_Helo-red-alk-tryp-001.raw | 24 | 24 | JAW07022.1                                         | Formylation                                                | E1:Formylation:1000.00                                                                                                             |
| APEPAPEPAPEAAPEAAPEAAA APE(+258.09)RRR                   | 30,68 | 3173,538 | 29 | 0    | 1587,776 | 42,73 | 0        | 1 | 14649 | 150211-Fr_I_Helo-red-alk-tryp-001.raw | 1  | 1  | JAW07022.1                                         | Diglutamyl                                                 | E26:Diglutamyl:0.00                                                                                                                |
| V(+42.01)NEPSFIGD(+43.99)SAI LGHQVLDPVDLVK               | 30,56 | 2875,46  | 26 | -5   | 959,4893 | 52,05 | 0        | 1 | 17872 | 150211-Fr_I_Helo-red-alk-tryp-001.raw | 1  | 1  | JAG85213.1                                         | Acetylation (N-term); Carboxylation (DKW)                  | V1:Acetylation (N-term):1000.00;D9:Carboxylation (DKW):67.73                                                                       |
| SDPPFITK                                                 | 30,55 | 903,4702 | 8  | 1,1  | 452,7429 | 29,28 | 0        | 1 | 9839  | 150211-Fr_I_Helo-red-alk-tryp-001.raw | 1  | 1  | AMO02558.1:JAW07025.1:JAW06984.1                   |                                                            |                                                                                                                                    |
| S(+71.04)VTPDGPQIR                                       | 30,5  | 1139,594 | 10 | 0,1  | 570,8041 | 30,1  | 0        | 1 | 10107 | 150211-Fr_I_Helo-red-alk-tryp-001.raw | 2  | 2  | JAG85161.1                                         | Propionamide (K X@N-term)                                  | S1:Propionamide (K X@N-term):1000.00                                                                                               |
| NLLDTLNLGIK                                              | 30,47 | 1212,708 | 11 | 2,6  | 607,3627 | 36,72 | 0        | 1 | 12461 | 150211-Fr_I_Helo-red-alk-tryp-001.raw | 1  | 1  | AIJ02110.2:JAG85213.1                              |                                                            |                                                                                                                                    |
| TEPSFIKDNLIPGPPAAFDPDLIS (+59.02)AMSK                    | 30,45 | 3128,593 | 29 | 1,6  | 1043,873 | 50,7  | 0        | 1 | 17423 | 150211-Fr_I_Helo-red-alk-tryp-001.raw | 2  | 2  | AIJ02109.2:P86392.3:V9Z9A3.1:AHE40589.1:AHE40588.1 | Aminoethylcysteine                                         | S25:Aminoethylcysteine:0.00                                                                                                        |
| K(+14.96)GSSGYC(+57.02)AWP AC(+57.02)YC(+57.02)YGLPDSV K | 30,43 | 2540,045 | 22 | 5    | 847,6931 | 37,36 | 0        | 1 | 12698 | 150211-Fr_I_Helo-red-alk-tryp-001.raw | 1  | 1  | AAC25688.1:O77463.1:AAW72465.1                     | Alpha-amino adipic acid; Carbamidomethylation              | K1:Alpha-amino adipic acid:54.14;C7:Carbamidomethylation:1000.00;C12:Carbamidomethylation:1000.00;C14:Carbamidomethylation:1000.00 |
| TITIAHEAGHMLGLP(+31.99)HD GQ(+.98)ESTEVGVPNGPGAK         | 30,43 | 3352,599 | 33 | -0,2 | 671,527  | 17,9  | 0        | 1 | 5862  | 150211-Fr_I_Helo-red-alk-tryp-001.raw | 1  | 1  | JAW07039.1                                         | Dihydroxy; Deamidation (NQ)                                | P15:Dihydroxy:16.22;Q19:Deamidation (NQ):18.04                                                                                     |
| F(+164.06)FTLPQASC(+57.02)LR                             | 30,29 | 1502,736 | 11 | 3,2  | 752,3775 | 38,91 | 0        | 1 | 13265 | 150211-Fr_I_Helo-red-alk-tryp-001.raw | 2  | 2  | JAW07039.1                                         | O-Diisopropylphosphorylation                               | F1:O-Diisopropylphosphorylation:32                                                                                                 |

J Venom Anim Toxins incl Trop Dis, 2019

|                                                                         |       |          |    |      |          |       |          |   |       |                                       |    |    |                                                      |                                                                  |                                                                                                                                       |  |                             |                                         |
|-------------------------------------------------------------------------|-------|----------|----|------|----------|-------|----------|---|-------|---------------------------------------|----|----|------------------------------------------------------|------------------------------------------------------------------|---------------------------------------------------------------------------------------------------------------------------------------|--|-----------------------------|-----------------------------------------|
|                                                                         |       |          |    |      |          |       |          |   |       |                                       |    |    |                                                      |                                                                  |                                                                                                                                       |  | on;<br>Carbamidomethylation | .28;C9:Carbamidomethylation:<br>1000.00 |
| <b>S(+58.01)SGYC(+57.02)AWPAC<br/>(+57.02)YC(+57.02)YGLPDSVK</b>        | 30,29 | 2397,971 | 20 | 2,1  | 800,3325 | 44,01 | 0        | 1 | 15109 | 150211-Fr_I_Helo-red-alk-tryp-001.raw | 1  | 1  | AAC25688.1:O77463<br>.1:AAC25689.1                   | Carboxymethyl (KW X@N-term);<br>Carbamidomethylation             | S1:Carboxymethyl (KW X@N-term):0.00;C5:Carbamidomethylation:1000.00;C10:Carbamidomethylation:1000.00;C12:Carbamidomethylation:1000.00 |  |                             |                                         |
| <b>KVNEPSFIGDS(+86.00)AILGHQ<br/>QVLDPVDLVK</b>                         | 30,2  | 3003,555 | 27 | -4,7 | 1002,188 | 41,94 | 0        | 1 | 14363 | 150211-Fr_I_Helo-red-alk-tryp-001.raw | 1  | 1  | JAG85213.1                                           | Malonylation                                                     | S11:Malonylation:0.00                                                                                                                 |  |                             |                                         |
| <b>Q(sub A)EIDFSGIPEDIKR(sub<br/>E)</b>                                 | 30,03 | 1758,915 | 15 | 0,2  | 587,3124 | 37,01 | 0        | 1 | 12569 | 150211-Fr_I_Helo-red-alk-tryp-001.raw | 2  | 2  | P84190.1                                             |                                                                  |                                                                                                                                       |  |                             |                                         |
| <b>Q(+.98)IKETNAKPPA</b>                                                | 30,02 | 1196,64  | 11 | -2,6 | 599,3257 | 15,07 | 0        | 1 | 4803  | 150211-Fr_I_Helo-red-alk-tryp-001.raw | 6  | 6  | JAW06987.1:JAW07038.1:JAW06992.1                     | Deamidation (NQ)                                                 | Q1:Deamidation (NQ):14.62                                                                                                             |  |                             |                                         |
| <b>T(+87.03)SKSEYAC(+57.02)PVI<br/>DKFC(+57.02)EDHC(+57.02)AA<br/>K</b> | 29,78 | 2702,178 | 22 | -3,7 | 676,5491 | 31,97 | 0        | 1 | 10744 | 150211-Fr_I_Helo-red-alk-tryp-001.raw | 8  | 8  | Q0GY43.1:ABE98264<br>.1                              | Glycidamide adduct;<br>Carbamidomethylation                      | T1:Glycidamide adduct:0.00;C8:Carbamidomethylation:1000.00;C15:Carbamidomethylation:1000.00;C19:Carbamidomethylation:1000.00          |  |                             |                                         |
| <b>PAPEPAPEAAPEAAPEAAAPE<br/>R(+199.07)R</b>                            | 29,71 | 2661,286 | 25 | 4,4  | 1331,656 | 37,28 | 0        | 1 | 12670 | 150211-Fr_I_Helo-red-alk-tryp-001.raw | 1  | 1  | JAW07022.1                                           | Oxidized Arginine biotinylated with biotin hydrazide             | R24:Oxidized Arginine biotinylated with biotin hydrazide:0.00                                                                         |  |                             |                                         |
| <b>AEIDFSGIPEDIK(+114.04)EIK</b>                                        | 29,65 | 2030,057 | 17 | 4,4  | 1016,04  | 52,31 | 0        | 1 | 17958 | 150211-Fr_I_Helo-red-alk-tryp-001.raw | 1  | 1  | P84190.1                                             | Ubiquitin                                                        | K14:Ubiquitin:5.77                                                                                                                    |  |                             |                                         |
| <b>E(-18.01)IKETN(+.98)AKPPA</b>                                        | 29,61 | 1179,614 | 11 | -3,3 | 590,8121 | 5,88  | 0        | 1 | 1487  | 150211-Fr_I_Helo-red-alk-tryp-001.raw | 1  | 1  | P84190.1                                             | Pyro-glu from E;<br>Deamidation (NQ)                             | E1:Pyro-glu from E:1000.00;N6:Deamidation (NQ):1000.00                                                                                |  |                             |                                         |
| <b>Q(sub E)IDFSGIPEDIK</b>                                              | 29,57 | 1473,772 | 13 | -0,6 | 737,8926 | 46,74 | 0        | 1 | 16072 | 150211-Fr_I_Helo-red-alk-tryp-001.raw | 2  | 2  | JAW06987.1:JAW07038.1:JAW06992.1:P84190.1            |                                                                  |                                                                                                                                       |  |                             |                                         |
| <b>GKEGYAMDHEGC(+57.02)K</b>                                            | 29,53 | 1480,607 | 13 | -0,2 | 494,543  | 5,38  | 3,49E+06 | 1 | 1320  | 150211-Fr_I_Helo-red-alk-tryp-001.raw | 3  | 3  | JAW07016.1:JAW06979.1:COHJM9.1:JAG85185.1:CEF39517.1 | Carbamidomethylation                                             | C12:Carbamidomethylation:1000.00                                                                                                      |  |                             |                                         |
| <b>AQ(sub E)V(sub I)DFSGIPEDIK</b>                                      | 29,52 | 1530,793 | 14 | -0,7 | 766,4032 | 46,1  | 0        | 1 | 15850 | 150211-Fr_I_Helo-red-alk-tryp-001.raw | 3  | 3  | JAW06987.1:JAW07038.1:JAW06992.1:P84190.1            |                                                                  |                                                                                                                                       |  |                             |                                         |
| <b>PEAAPEAAPEAAAPEERR(+14.<br/>02)R</b>                                 | 29,47 | 2070,061 | 20 | -0,2 | 691,0273 | 12,45 | 0        | 1 | 3851  | 150211-Fr_I_Helo-red-alk-tryp-001.raw | 1  | 1  | JAW07022.1                                           | Methylation(KR)                                                  | R19:Methylation(KR):0.00                                                                                                              |  |                             |                                         |
| <b>EALAPEAPEAPEAPE(+37.03<br/>)AAPEAAPEPA</b>                           | 29,46 | 2752,323 | 28 | 1,7  | 918,4498 | 38,42 | 0        | 1 | 13089 | 150211-Fr_I_Helo-red-alk-tryp-001.raw | 1  | 1  | JAW07022.1:P86821<br>.1                              | Propargylamine                                                   | E18:Propargylamine:0.00                                                                                                               |  |                             |                                         |
| <b>GGIFDIADILPITTN(+.98)FFR(-<br/>.98)</b>                              | 29,41 | 2138,105 | 19 | 4,6  | 1070,065 | 61,44 | 8,61E+05 | 1 | 20918 | 150211-Fr_I_Helo-red-alk-tryp-001.raw | 1  | 1  | JAW07023.1                                           | Deamidation (NQ);<br>Amidation                                   | N16:Deamidation (NQ):1000.00;R19:Amidation:1000.00                                                                                    |  |                             |                                         |
| <b>PEAAPEAAPEAAAAPER(+380.<br/>15)RR</b>                                | 29,32 | 2436,192 | 20 | -2,4 | 1219,1   | 19,55 | 0        | 1 | 6491  | 150211-Fr_I_Helo-red-alk-tryp-001.raw | 1  | 1  | JAW07022.1                                           | Nucleophilic addition to cytopiloyne+H2O                         | R18:Nucleophilic addition to cytopiloyne+H2O:0.00                                                                                     |  |                             |                                         |
| <b>ITC(+57.02)FLTAAGYC(+57.02)<br/>NTE(+17.03)</b>                      | 29,32 | 1636,723 | 14 | -1,9 | 819,367  | 20,24 | 0        | 1 | 6751  | 150211-Fr_I_Helo-red-alk-tryp-001.raw | 13 | 13 | AAC25688.1:O77463<br>.1:AAC25689.1                   | Carbamidomethylation;<br>Replacement of proton with ammonium ion | C3:Carbamidomethylation:1000.00;C11:Carbamidomethylation:1000.00;E14:Replacement of proton with ammonium ion:1000.00                  |  |                             |                                         |

J Venom Anim Toxins incl Trop Dis, 2019

|                                                         |       |          |    |      |          |       |          |   |       |                                       |    |    |                                                              |                                                                                         |                                                                                                                                            |
|---------------------------------------------------------|-------|----------|----|------|----------|-------|----------|---|-------|---------------------------------------|----|----|--------------------------------------------------------------|-----------------------------------------------------------------------------------------|--------------------------------------------------------------------------------------------------------------------------------------------|
| <b>APEAAPEPAAAPE(+17.03)AAPE</b>                        | 29,29 | 1675,805 | 18 | -0,4 | 838,9095 | 25,72 | 0        | 1 | 8692  | 150211-Fr_I_Helo-red-alk-tryp-001.raw | 3  | 3  | POC8W6.1                                                     | Replacement of proton with ammonium ion                                                 | E14:Replacement of proton with ammonium ion:7.89                                                                                           |
| <b>KMFPDIEK</b>                                         | 29,29 | 1006,516 | 8  | -0,1 | 504,2651 | 12,23 | 0        | 1 | 3775  | 150211-Fr_I_Helo-red-alk-tryp-001.raw | 30 | 30 |                                                              |                                                                                         |                                                                                                                                            |
| <b>AEV(sub I)DFSGIPEDIK</b>                             | 29,22 | 1531,777 | 14 | -2,2 | 766,894  | 41,26 | 0        | 1 | 14116 | 150211-Fr_I_Helo-red-alk-tryp-001.raw | 3  | 3  | JAW06987.1:JAW07038.1:JAW06992.1:P84190.1                    |                                                                                         |                                                                                                                                            |
| <b>ETRPITSWHT(+59.02)IGILMRW DKEQLQISYVFK</b>           | 29,17 | 3505,837 | 28 | 2,3  | 585,3148 | 48,15 | 0        | 1 | 16559 | 150211-Fr_I_Helo-red-alk-tryp-001.raw | 1  | 1  | JAW07031.1:JAW06995.1                                        | Aminoethylcysteine                                                                      | T10:Aminoethylcysteine:6.65                                                                                                                |
| <b>RLTSESEYAC(+57.02)PAIDKFC(+57.02)EDHC(+57.02)AAK</b> | 29,15 | 2857,247 | 24 | 3    | 953,4257 | 32,23 | 0        | 1 | 10840 | 150211-Fr_I_Helo-red-alk-tryp-001.raw | 1  | 1  | QOGY42.1:ABE98265.1:JAG85223.1                               | Carbamidomethylation                                                                    | C10:Carbamidomethylation:1000.00;C17:Carbamidomethylation:1000.00;C21:Carbamidomethylation:1000.00                                         |
| <b>G(sub E)IDFSGIPEDIK</b>                              | 29,07 | 1402,734 | 13 | -0,7 | 702,374  | 39,56 | 1,49E+09 | 1 | 13500 | 150211-Fr_I_Helo-red-alk-tryp-001.raw | 7  | 7  | JAW06987.1:JAW07038.1:JAW06992.1:P84190.1                    |                                                                                         |                                                                                                                                            |
| <b>AEIDFSGIPEDIK(+109.05)QI</b>                         | 29,07 | 1895,988 | 16 | -0,3 | 949,001  | 50,57 | 0        | 1 | 17383 | 150211-Fr_I_Helo-red-alk-tryp-001.raw | 2  | 2  | JAW06987.1:JAW07038.1:JAW06992.1                             | Methylpyrrolone                                                                         | K14:Methylpyrrolone:1000.00                                                                                                                |
| <b>G(sub N)DYLLYC(+57.02)DFSDKDPK</b>                   | 28,94 | 1834,808 | 15 | -1,8 | 918,4098 | 20,08 | 0        | 1 | 6690  | 150211-Fr_I_Helo-red-alk-tryp-001.raw | 2  | 2  | JAG85161.1                                                   | Carbamidomethylation                                                                    | C7:Carbamidomethylation:1000.00                                                                                                            |
| <b>E(sub A)SSGYCAWPAC(+57.02)YC(+57.02)YGVDPHIK</b>     | 28,9  | 2462,013 | 21 | 4,4  | 821,6819 | 36,49 | 0        | 1 | 12373 | 150211-Fr_I_Helo-red-alk-tryp-001.raw | 2  | 2  | JAW07016.1:JAW06979.1:P68411.1:1913435A:P68410.1:AA B36322.1 | Carbamidomethylation                                                                    | C11:Carbamidomethylation:1000.00;C13:Carbamidomethylation:1000.00                                                                          |
| <b>EPAPEAAPEAAPEPAAAPERRR(+380.15)</b>                  | 28,87 | 2733,325 | 23 | 1,9  | 912,1172 | 37,78 | 0        | 1 | 12854 | 150211-Fr_I_Helo-red-alk-tryp-001.raw | 3  | 3  | JAW07022.1                                                   | Nucleophilic addition to cytopiloyne+H2O                                                | R23:Nucleophilic addition to cytopiloyne+H2O:5.03                                                                                          |
| <b>FTGIADSIK</b>                                        | 28,86 | 1063,591 | 10 | 0,8  | 532,8033 | 15,57 | 0        | 1 | 4985  | 150211-Fr_I_Helo-red-alk-tryp-001.raw | 1  | 1  | JAW07002.1:P86824.1                                          |                                                                                         |                                                                                                                                            |
| <b>P(sub A)EV(sub I)DFSGIPEDIK</b>                      | 28,86 | 1557,793 | 14 | 0,3  | 779,9038 | 44,61 | 0        | 1 | 15324 | 150211-Fr_I_Helo-red-alk-tryp-001.raw | 10 | 10 | JAW06987.1:JAW07038.1:JAW06992.1:P84190.1                    |                                                                                         |                                                                                                                                            |
| <b>FINGGTDNSGIITLLPGS(sub T)DS(sub P)SVTK</b>           | 28,85 | 2505,296 | 25 | 1,2  | 1253,657 | 47,63 | 1,84E+08 | 1 | 16381 | 150211-Fr_I_Helo-red-alk-tryp-001.raw | 1  | 1  | XP_023239442.1                                               |                                                                                         |                                                                                                                                            |
| <b>IDFSGIPE(+53.92)DIK</b>                              | 28,83 | 1399,632 | 12 | 0,6  | 467,5516 | 37,81 | 0        | 1 | 12865 | 150211-Fr_I_Helo-red-alk-tryp-001.raw | 1  | 1  | JAW06987.1:JAW07038.1:JAW06992.1:P84190.1                    | Replacement of 2 protons by iron                                                        | E8:Replacement of 2 protons by iron:0.00                                                                                                   |
| <b>TNEALTEYVTQMFTGVQVN(+.98)MYDTM(+15.99)NLDIKI</b>     | 28,81 | 3399,556 | 29 | -0,6 | 850,8958 | 49,35 | 0        | 1 | 16969 | 150211-Fr_I_Helo-red-alk-tryp-001.raw | 2  | 2  | JAG85190.1                                                   | Deamidation (NQ); Oxidation (M)                                                         | N18:Deamidation (NQ):0.00;M23:Oxidation (M):11.12                                                                                          |
| <b>AQVIGITPF</b>                                        | 28,75 | 944,5331 | 9  | 0,4  | 473,274  | 33,01 | 0        | 1 | 11118 | 150211-Fr_I_Helo-red-alk-tryp-001.raw | 12 | 12 | AIJ02110.2:JAG85213.1                                        |                                                                                         |                                                                                                                                            |
| <b>P(+41.03)SGFC(+57.02)DGYC(+57.02)K</b>               | 28,69 | 1230,48  | 10 | -1,4 | 616,2463 | 6,02  | 0        | 1 | 1533  | 150211-Fr_I_Helo-red-alk-tryp-001.raw | 38 | 38 | C0HJM9.1:JAG85185.1:CEF39517.1:P60276.1                      | Amidation of lysines or N-terminal amines with methyl acetimidate; Carbamidomethylation | P1:Amidation of lysines or N-terminal amines with methyl acetimidate:77.72;C5:Carbamidomethylation:1000.00;C9:Carbamidomethylation:1000.00 |
| <b>PEAAPEPAAAPER(+380.15)RR</b>                         | 28,66 | 2068,023 | 16 | -2,6 | 1035,016 | 33,66 | 0        | 1 | 11352 | 150211-Fr_I_Helo-red-alk-tryp-001.raw | 4  | 4  | JAW07022.1                                                   | Nucleophilic addition to cytopiloyne+H2O                                                | R14:Nucleophilic addition to cytopiloyne+H2O:11.06                                                                                         |
| <b>EALAPEPAPEPAPE(+17.03)PAP EAAPEAAPEPA</b>            | 28,62 | 2732,318 | 28 | 2,8  | 1367,17  | 38,64 | 0        | 1 | 13168 | 150211-Fr_I_Helo-red-alk-tryp-001.raw | 1  | 1  | JAW07022.1:P86821.1                                          | Replacement of proton with ammonium ion                                                 | E14:Replacement of proton with ammonium ion:0.00                                                                                           |

J Venom Anim Toxins incl Trop Dis, 2019

|                                                                      |       |          |    |      |          |       |          |   |       |                                       |    |    |                                                                                                                            |                                          |                                                                                                                              |
|----------------------------------------------------------------------|-------|----------|----|------|----------|-------|----------|---|-------|---------------------------------------|----|----|----------------------------------------------------------------------------------------------------------------------------|------------------------------------------|------------------------------------------------------------------------------------------------------------------------------|
| <b>AEIDFSGIPE(+37.96)D</b>                                           | 28,5  | 1229,485 | 11 | -2,2 | 615,7486 | 34,07 | 0        | 1 | 11504 | 150211-Fr_I_Helo-red-alk-tryp-001.raw | 3  | 3  | JAW06987.1:JAW07038.1:JAW06992.1:P84190.1                                                                                  | Replacement of proton by potassium       | E10:Replacement of proton by potassium:12.28                                                                                 |
| <b>FC(+57.02)EDHC(+57.02)AA</b>                                      | 28,46 | 1008,343 | 8  | -0,1 | 505,1787 | 5,73  | 0        | 1 | 1432  | 150211-Fr_I_Helo-red-alk-tryp-001.raw | 1  | 1  | P86822.2:P0C8W4.2:AFP87551.1:Q0GY42.1:ABE98265.1:JAG85223.1:ABV64385.1:ABE98262.1:Q0GY45.1:Q0GY43.1:ABE98264.1             | Carbamidomethylation                     | C2:Carbamidomethylation:100.00;C6:Carbamidomethylation:1000.00                                                               |
| <b>APEPAPEAAPEPVAAAAPER(-.98)</b>                                    | 28,44 | 1938,98  | 20 | -1   | 970,4962 | 32,89 | 0        | 1 | 11075 | 150211-Fr_I_Helo-red-alk-tryp-001.raw | 1  | 1  | JAG85215.1                                                                                                                 | Amidation                                | R20:Amidation:1000.00                                                                                                        |
| <b>KQNEPSFIEDS(+59.02)AIPGHQ QVLDPVDLVK</b>                          | 28,3  | 3061,554 | 27 | 1,4  | 1021,527 | 43,82 | 0        | 1 | 15039 | 150211-Fr_I_Helo-red-alk-tryp-001.raw | 1  | 1  | AIJ02110.2                                                                                                                 | Aminoethylcysteine                       | S11:Aminoethylcysteine:0.00                                                                                                  |
| <b>APEPAPEPAPEAAPEAAPEAAA APERR(+44.03)</b>                          | 28,26 | 2803,377 | 28 | 2    | 1402,699 | 38,6  | 0        | 1 | 13154 | 150211-Fr_I_Helo-red-alk-tryp-001.raw | 1  | 1  | JAW07022.1                                                                                                                 | Ethanolation (KR)                        | R28:Ethanolation (KR):0.00                                                                                                   |
| <b>FGPNVAGETAASEVNFHFSAPHL IFPEGM(+15.99)K(+42.02)</b>               | 28,17 | 3258,556 | 30 | 1,3  | 815,6472 | 47,36 | 0        | 1 | 16288 | 150211-Fr_I_Helo-red-alk-tryp-001.raw | 1  | 1  | JAW07031.1:JAW06995.1                                                                                                      | Oxidation (M); Guanidination             | M29:Oxidation (M):1000.00;K30:Guanidination:1000.00                                                                          |
| <b>Q(sub A)EIDFSGIPEDIKQ</b>                                         | 28,03 | 1730,873 | 15 | -1   | 866,4427 | 45,15 | 5,85E+07 | 1 | 15513 | 150211-Fr_I_Helo-red-alk-tryp-001.raw | 39 | 39 | JAW06987.1:JAW07038.1:JAW06992.1                                                                                           |                                          |                                                                                                                              |
| <b>A(+43.01)MDHEGC(+57.02)K</b>                                      | 27,97 | 989,3695 | 8  | 0    | 495,692  | 5,41  | 6,91E+06 | 1 | 1330  | 150211-Fr_I_Helo-red-alk-tryp-001.raw | 3  | 3  | JAW07016.1:JAW06979.1:P68411.1:1913435A:P68410.1:AA B36322.1:AAW72453.1:Q5G8B8.1:COHJ M9.1:JAG85185.1:CE F39517.1:P60276.1 | Carbamylation; Carbamidomethylation      | A1:Carbamylation:43.57;C7:Carbamidomethylation:1000.00                                                                       |
| <b>ASSGYC(+57.02)AWPAC(+57.02)YVC(+57.02)YGVDPDHKVDYAT(+59.02)NK</b> | 27,95 | 3497,509 | 29 | 1,7  | 875,386  | 46,56 | 0        | 1 | 16011 | 150211-Fr_I_Helo-red-alk-tryp-001.raw | 1  | 1  | JAW07016.1:JAW06979.1:P68411.1:1913435A:P68410.1:AA B36322.1                                                               | Carbamidomethylation; Aminoethylcysteine | C6:Carbamidomethylation:100.00;C11:Carbamidomethylation:1000.00;C13:Carbamidomethylation:1000.00;T27:Aminoethylcysteine:0.00 |
| <b>AEID(+15.99)FSGIPEDIKQ</b>                                        | 27,89 | 1689,846 | 15 | -0,7 | 845,9297 | 49,44 | 0        | 1 | 17002 | 150211-Fr_I_Helo-red-alk-tryp-001.raw | 1  | 1  | JAW06987.1:JAW07038.1:JAW06992.1                                                                                           | Oxidation or Hydroxylation               | D4:Oxidation or Hydroxylation:61.30                                                                                          |
| <b>APEAAPEAAPEAAAAPER(-.98)(+14.02)</b>                              | 27,88 | 1827,911 | 19 | -4,9 | 914,9585 | 19,85 | 0        | 1 | 6603  | 150211-Fr_I_Helo-red-alk-tryp-001.raw | 2  | 2  | JAW07022.1                                                                                                                 | Amidation; Methylation(KR)               | R19:Amidation:1000.00;R19:Methylation(KR):1000.00                                                                            |
| <b>APEAAPEAAAAP</b>                                                  | 27,87 | 1161,567 | 13 | -0,1 | 581,7905 | 30,65 | 0        | 1 | 10291 | 150211-Fr_I_Helo-red-alk-tryp-001.raw | 2  | 2  | JAW07022.1:P86821.1:P0C8W6.1                                                                                               |                                          |                                                                                                                              |
| <b>EPAPEPAPEAAPEAAPEPAA</b>                                          | 27,86 | 1910,89  | 20 | -2,9 | 956,4493 | 15,92 | 0        | 1 | 5116  | 150211-Fr_I_Helo-red-alk-tryp-001.raw | 5  | 5  | JAW07022.1:P86821.1                                                                                                        |                                          |                                                                                                                              |
| <b>EALAPE(+37.95)PAPEP</b>                                           | 27,85 | 1157,492 | 11 | 3,2  | 579,755  | 31,72 | 0        | 1 | 10658 | 150211-Fr_I_Helo-red-alk-tryp-001.raw | 1  | 1  | JAW07022.1:P86821.1                                                                                                        | Replacement of 2 protons by calcium      | E6:Replacement of 2 protons by calcium:54.46                                                                                 |
| <b>AEIDFSGIPEDIK(+163.05)QIK</b>                                     | 27,81 | 2078,076 | 17 | 3,9  | 1040,049 | 46,97 | 0        | 1 | 16152 | 150211-Fr_I_Helo-red-alk-tryp-001.raw | 1  | 1  | JAW06987.1:JAW07038.1:JAW06992.1                                                                                           | Phenethyl isothiocyanate                 | K14:Phenethyl isothiocyanate:13.38                                                                                           |
| <b>AEID(+21.98)FSGIPED</b>                                           | 27,81 | 1213,512 | 11 | 1,1  | 607,7637 | 34,47 | 0        | 1 | 11647 | 150211-Fr_I_Helo-red-alk-tryp-001.raw | 2  | 2  | JAW06987.1:JAW07038.1:JAW06992.1:P84190.1                                                                                  | Sodium adduct                            | D4:Sodium adduct:0.00                                                                                                        |

J Venom Anim Toxins incl Trop Dis, 2019

|                                                                |       |          |    |      |          |       |   |   |       |                                       |    |    |                                                                                                                                                 |                                                               |                                                                                                                                       |
|----------------------------------------------------------------|-------|----------|----|------|----------|-------|---|---|-------|---------------------------------------|----|----|-------------------------------------------------------------------------------------------------------------------------------------------------|---------------------------------------------------------------|---------------------------------------------------------------------------------------------------------------------------------------|
| <b>C(+57.02)VEYLLSKPTASC(+57.02)IFQQC(+57.02)S</b>             | 27,64 | 2290,043 | 19 | 1,9  | 764,3564 | 37,86 | 0 | 1 | 12882 | 150211-Fr_I_Helo-red-alk-tryp-001.raw | 1  | 1  | AIJ02109.2                                                                                                                                      | Carbamidomethylation                                          | C1:Carbamidomethylation:1000.00;C13:Carbamidomethylation:1000.00;C18:Carbamidomethylation:1000.00                                     |
| <b>PAPEPAPEPAPEAAPEAAPEPAAAPERR(+79.97)RR</b>                  | 27,64 | 3248,573 | 31 | 3,1  | 1083,868 | 41,03 | 0 | 1 | 14034 | 150211-Fr_I_Helo-red-alk-tryp-001.raw | 1  | 1  | JAW07022.1                                                                                                                                      | Phosphorylation (HCDR)                                        | R29:Phosphorylation (HCDR):0.00                                                                                                       |
| <b>YYC(+57.02)NNAK</b>                                         | 27,59 | 931,3858 | 7  | 1,5  | 466,7009 | 5,57  | 0 | 1 | 1379  | 150211-Fr_I_Helo-red-alk-tryp-001.raw | 19 | 19 | AIJ02110.2:JAG85213.1                                                                                                                           | Carbamidomethylation                                          | C3:Carbamidomethylation:1000.00                                                                                                       |
| <b>ESLIPGIDTIF</b>                                             | 27,45 | 1203,639 | 11 | -1,7 | 602,8256 | 49,1  | 0 | 1 | 16883 | 150211-Fr_I_Helo-red-alk-tryp-001.raw | 2  | 2  | AMO02560.1                                                                                                                                      |                                                               |                                                                                                                                       |
| <b>AAPEAAPEPAAAPER(-.98)(+14.02)</b>                           | 27,41 | 1530,779 | 16 | -4,7 | 766,3931 | 39,18 | 0 | 1 | 13362 | 150211-Fr_I_Helo-red-alk-tryp-001.raw | 1  | 1  | JAW07022.1                                                                                                                                      | Amidation; Methylation(KR)                                    | R16:Amidation:1000.00;R16:Methylation(KR):1000.00                                                                                     |
| <b>G(sub R)LTSQSEYAC(+57.02)PAIDK</b>                          | 27,04 | 1638,756 | 15 | -0,1 | 820,3851 | 30,83 | 0 | 1 | 10352 | 150211-Fr_I_Helo-red-alk-tryp-001.raw | 8  | 8  | P86822.2:POC8W4.2:AFP87551.1                                                                                                                    | Carbamidomethylation                                          | C10:Carbamidomethylation:1000.00                                                                                                      |
| <b>R(-42.02)LTSQSEYAC(+57.02)PAIDKFC(+57.02)EDHC(+57.02)AA</b> | 27,02 | 2686,146 | 23 | -0,5 | 896,3889 | 34,21 | 0 | 1 | 11554 | 150211-Fr_I_Helo-red-alk-tryp-001.raw | 1  | 1  | P86822.2:POC8W4.2:AFP87551.1                                                                                                                    | Ornithine from Arginine; Carbamidomethylation                 | R1:Ornithine from Arginine:1000.00;C10:Carbamidomethylation:1000.00;C17:Carbamidomethylation:1000.00;C21:Carbamidomethylation:1000.00 |
| <b>C(+57.02)NC(+57.02)IKL</b>                                  | 26,99 | 806,3779 | 6  | -0,5 | 404,196  | 23,94 | 0 | 1 | 8095  | 150211-Fr_I_Helo-red-alk-tryp-001.raw | 17 | 17 | P86822.2:Q0GY42.1:ABE98265.1:JAG8523.1:ABV64385.1:ABE98262.1:Q0GY45.1                                                                           | Carbamidomethylation                                          | C1:Carbamidomethylation:1000.00;C3:Carbamidomethylation:1000.00                                                                       |
| <b>APEPAPEAAPE(+37.95)AAPEPAA</b>                              | 26,97 | 1722,741 | 18 | 0,5  | 575,2546 | 32,52 | 0 | 1 | 10943 | 150211-Fr_I_Helo-red-alk-tryp-001.raw | 1  | 1  | JAW07022.1:P86821.1                                                                                                                             | Replacement of 2 protons by calcium                           | E11:Replacement of 2 protons by calcium:22.72                                                                                         |
| <b>AEIDFSGIPEDIK(+136.03)QI</b>                                | 26,95 | 1922,964 | 16 | -0,9 | 641,9948 | 50,25 | 0 | 1 | 17275 | 150211-Fr_I_Helo-red-alk-tryp-001.raw | 1  | 1  | JAW06987.1:JAW07038.1:JAW06992.1                                                                                                                | O-Diethylphosphorylation                                      | K14:O-Diethylphosphorylation:64.00                                                                                                    |
| <b>ALAPEPAPEPAPE(+17.03)PAPEA</b>                              | 26,95 | 1769,883 | 18 | -0,2 | 885,9488 | 34,02 | 0 | 1 | 11483 | 150211-Fr_I_Helo-red-alk-tryp-001.raw | 24 | 24 | JAW07022.1:P86821.1                                                                                                                             | Replacement of proton with ammonium ion                       | E13:Replacement of proton with ammonium ion:0.00                                                                                      |
| <b>ADVDFGTIADSIKKIKETNAKPPAR(+212.01)</b>                      | 26,93 | 3009,542 | 26 | -0,3 | 1505,778 | 38,33 | 0 | 1 | 13060 | 150211-Fr_I_Helo-red-alk-tryp-001.raw | 1  | 1  | JAW07002.1                                                                                                                                      | phosphate-ribosylation                                        | R26:phosphate-ribosylation:0.00                                                                                                       |
| <b>AEIDFSGIPEDIKQIKETN(-17.03)AKPPARFDP</b>                    | 26,9  | 3221,661 | 29 | 1,7  | 1611,84  | 39,29 | 0 | 1 | 13402 | 150211-Fr_I_Helo-red-alk-tryp-001.raw | 1  | 1  | JAW06987.1:JAW07038.1:JAW06992.1                                                                                                                | Ammonia-loss (N)                                              | N20:Ammonia-loss (N):1000.00                                                                                                          |
| <b>SC(+57.02)PYDDGYIMGSTIE(+17.03)PN</b>                       | 26,88 | 1934,803 | 17 | -0,9 | 968,4077 | 35,63 | 0 | 1 | 12060 | 150211-Fr_I_Helo-red-alk-tryp-001.raw | 1  | 1  | JAG85190.1                                                                                                                                      | Carbamidomethylation; Replacement of proton with ammonium ion | C2:Carbamidomethylation:1000.00;E15:Replacement of proton with ammonium ion:16.78                                                     |
| <b>KGSSGYC(+57.02)AWPAC(+57.02)YC(+57.02)YGLPNWVK(+41.26)</b>  | 26,83 | 3034,404 | 22 | -4,3 | 1012,471 | 51,93 | 0 | 1 | 17833 | 150211-Fr_I_Helo-red-alk-tryp-001.raw | 1  | 1  | AAW72453.1:Q5G8B8.1:AAB29128.1:P56612.1:AIA81145.1:CAA46982.1:P15226.2:PODMM8.1:1NPI:1B7D:AAB36321.1:AA B36318.1:P56611.1:JAG85191.1:JAG85210.1 | Carbamidomethylation; LeudimethylArgGlyGly                    | C7:Carbamidomethylation:1000.00;C12:Carbamidomethylation:1000.00;C14:Carbamidomethylation:1000.00;K22:LeudimethylArgGlyGly:47.28      |

J Venom Anim Toxins incl Trop Dis, 2019

|                                                                             |       |          |    |      |          |       |          |   |       |                                       |    |    |                                           |                                                      |                                                                                                                                                                 |
|-----------------------------------------------------------------------------|-------|----------|----|------|----------|-------|----------|---|-------|---------------------------------------|----|----|-------------------------------------------|------------------------------------------------------|-----------------------------------------------------------------------------------------------------------------------------------------------------------------|
| PEAAPEAAAAAPER(+80.99)R                                                     | 26,77 | 1612,759 | 15 | -1,5 | 807,3857 | 18,5  | 0        | 1 | 6091  | 150211-Fr_I_Helo-red-alk-tryp-001.raw | 6  | 6  | JAW07022.1                                | Arginine replacement by Nitropyrimidyl ornithine     | R14:Arginine replacement by Nitropyrimidyl ornithine:0.00                                                                                                       |
| GSDVTGGFPVNSNNC(+57.02)IY (-94.04)PC(+57.02)YSTQDEIQ(+57.02)EEFC(+57.02)EKL | 26,76 | 4022,67  | 35 | -3,4 | 1341,893 | 44,57 | 0        | 1 | 15309 | 150211-Fr_I_Helo-red-alk-tryp-001.raw | 1  | 1  | JAW07006.1                                | Carbamidomethylation; Dehydroalanine (Y)             | C15:Carbamidomethylation:1000.00;Y17:Dehydroalanine (Y):0.00;C19:Carbamidomethylation:1000.00;C28:Carbamidomethylation:1000.00;C32:Carbamidomethylation:1000.00 |
| APEAAPEAAPEPA                                                               | 26,75 | 1219,572 | 13 | -0,2 | 610,7932 | 30,41 | 0        | 1 | 10208 | 150211-Fr_I_Helo-red-alk-tryp-001.raw | 8  | 8  | JAW07022.1:P86821.1                       |                                                      |                                                                                                                                                                 |
| PEPAAPEPAPEAAPEPVAA                                                         | 26,73 | 1809,878 | 19 | -0,5 | 905,946  | 34,85 | 0        | 1 | 11783 | 150211-Fr_I_Helo-red-alk-tryp-001.raw | 1  | 1  | JAG85215.1                                |                                                      |                                                                                                                                                                 |
| AEIDFS(+162.08)GIPEDIK                                                      | 26,69 | 1707,874 | 14 | -1   | 854,9432 | 48,72 | 0        | 1 | 16753 | 150211-Fr_I_Helo-red-alk-tryp-001.raw | 1  | 1  | JAW06987.1:JAW07038.1:JAW06992.1:P84190.1 | O-Pinacolylmethylphosphorylation                     | S6:O-Pinacolylmethylphosphorylation:24.61                                                                                                                       |
| ITC(+57.02)FLTAAGYC(+57.02)NTEC(+57.02)TLK(+43.01)K(+14.02)                 | 26,68 | 2307,07  | 19 | -0,2 | 770,0304 | 20,4  | 0        | 1 | 6810  | 150211-Fr_I_Helo-red-alk-tryp-001.raw | 1  | 1  | AAC25688.1:O77463.1: AAC25689.1           | Carbamidomethylation; Carbamylation; Methylation(KR) | C3:Carbamidomethylation:1000.00;C11:Carbamidomethylation:1000.00;C15:Carbamidomethylation:1000.00;K18:Carbamylation:0.00;K19:Methylation(KR):0.00               |
| LAPEPAPEPAPEAAPE(+17.03)AAPEPAA                                             | 26,67 | 2603,275 | 27 | -1,1 | 868,7648 | 37,16 | 2,39E+09 | 1 | 12624 | 150211-Fr_I_Helo-red-alk-tryp-001.raw | 2  | 2  | JAW07022.1:P86821.1                       | Replacement of proton with ammonium ion              | E20:Replacement of proton with ammonium ion:22.99                                                                                                               |
| AEIDFSGIPEDIK(+149.03)QIK                                                   | 26,64 | 2064,06  | 17 | 3,1  | 1033,041 | 48,49 | 0        | 1 | 16674 | 150211-Fr_I_Helo-red-alk-tryp-001.raw | 1  | 1  | JAW06987.1:JAW07038.1:JAW06992.1          | Benzyl isothiocyanate                                | K14:Benzyliothiocyanate:7.77                                                                                                                                    |
| SGIPEDIK                                                                    | 26,63 | 970,5334 | 9  | 0,1  | 486,274  | 30,83 | 0        | 1 | 10353 | 150211-Fr_I_Helo-red-alk-tryp-001.raw | 4  | 4  | JAW06987.1:JAW07038.1:JAW06992.1:P84190.1 |                                                      |                                                                                                                                                                 |
| AEIDFSGIPEDIKQIK(+188.03)ETNAKPPAR                                          | 26,58 | 3067,572 | 26 | -1,3 | 1023,53  | 38,49 | 0        | 1 | 13115 | 150211-Fr_I_Helo-red-alk-tryp-001.raw | 2  | 2  | JAW06987.1:JAW07038.1:JAW06992.1          | Lipoyl                                               | K17:Lipoyl:0.00                                                                                                                                                 |
| EPS(+79.97)Y(+79.97)IKESDVQNGK                                              | 26,57 | 1752,701 | 14 | -3,1 | 877,355  | 11,1  | 0        | 1 | 3378  | 150211-Fr_I_Helo-red-alk-tryp-001.raw | 3  | 3  | JAW07039.1:JAG85190.1:JAW07042.1          | Phosphorylation (STY)                                | S3:Phosphorylation (STY):14.62;Y4:Phosphorylation (STY):16.51                                                                                                   |
| PEAAPEAAPEAAAAAPER(-.98)(+14.02)                                            | 26,56 | 1756,874 | 18 | -4,2 | 879,4407 | 23,5  | 0        | 1 | 7939  | 150211-Fr_I_Helo-red-alk-tryp-001.raw | 1  | 1  | JAW07022.1                                | Amidation; Methylation(KR)                           | R18:Amidation:1000.00;R18:Methylation(KR):1000.00                                                                                                               |
| LSSW(sub A)ANMMQMEWDELAAVAQA HANQC(+57.02)K                                 | 26,54 | 3234,399 | 28 | 0,5  | 647,8875 | 33,88 | 0        | 1 | 11435 | 150211-Fr_I_Helo-red-alk-tryp-001.raw | 1  | 1  | JAW07031.1:JAW06995.1                     | Carbamidomethylation                                 | C27:Carbamidomethylation:1000.00                                                                                                                                |
| EPAAAAPEAAPE(+43.99)                                                        | 26,49 | 1166,509 | 12 | -3,4 | 584,2598 | 23,9  | 0        | 1 | 8081  | 150211-Fr_I_Helo-red-alk-tryp-001.raw | 5  | 5  | POC8W6.1                                  | Carboxylation (E)                                    | E12:Carboxylation (E):0.00                                                                                                                                      |
| KEALAPEPAKP(+31.99)APEPAPEPA                                                | 26,43 | 2138,089 | 21 | -1,8 | 713,7025 | 32,05 | 0        | 1 | 10774 | 150211-Fr_I_Helo-red-alk-tryp-001.raw | 1  | 1  | POC8W6.1                                  | Dihydroxy                                            | P12:Dihydroxy:0.00                                                                                                                                              |
| ESDVQNGK                                                                    | 26,41 | 875,3984 | 8  | 0,3  | 438,7066 | 5,56  | 0        | 1 | 1375  | 150211-Fr_I_Helo-red-alk-tryp-001.raw | 1  | 1  | JAW07039.1:JAG85190.1:JAW07042.1          |                                                      |                                                                                                                                                                 |
| APEAAAAPEAAPE                                                               | 26,37 | 1290,609 | 14 | -0,1 | 646,3118 | 58,3  | 1,02E+07 | 1 | 19920 | 150211-Fr_I_Helo-red-alk-tryp-001.raw | 49 | 49 | POC8W6.1                                  |                                                      |                                                                                                                                                                 |
| ADVDFGTIAD(-18.01)SIK(-.98)                                                 | 26,36 | 1444,756 | 14 | -0,4 | 723,385  | 12,44 | 0        | 1 | 3848  | 150211-Fr_I_Helo-red-alk-tryp-001.raw | 5  | 5  | JAW07002.1:P86824.1                       | Dehydration; Amidation                               | D10:Dehydration:0.00;K14:Amidation:1000.00                                                                                                                      |



J Venom Anim Toxins incl Trop Dis, 2019

|                                                                |       |          |    |      |          |       |          |   |       |                                       |    |    |                                                              |                                          |                                                                                                                              |
|----------------------------------------------------------------|-------|----------|----|------|----------|-------|----------|---|-------|---------------------------------------|----|----|--------------------------------------------------------------|------------------------------------------|------------------------------------------------------------------------------------------------------------------------------|
| <b>E(+27.99)ALAPEPAPEPAPEPA</b>                                | 26,31 | 1612,762 | 16 | -3,1 | 807,3857 | 7,78  | 0        | 1 | 2174  | 150211-Fr_I_Helo-red-alk-tryp-001.raw | 12 | 12 | P86821.1                                                     | Formylation (Protein N-term)             | E1:Formylation (Protein N-term):1000.00                                                                                      |
| <b>ALAPEPAPEPAP</b>                                            | 26,29 | 1158,592 | 12 | 0,8  | 580,3038 | 32,2  | 0        | 1 | 10827 | 150211-Fr_I_Helo-red-alk-tryp-001.raw | 1  | 1  | JAW07022.1:P86821.1                                          |                                          |                                                                                                                              |
| <b>GY(sub S)SGYCAWPAC(+57.02)YC(+57.02)YGLPDSVK</b>            | 26,29 | 2415,996 | 21 | 5,1  | 806,3435 | 41,22 | 0        | 1 | 14102 | 150211-Fr_I_Helo-red-alk-tryp-001.raw | 1  | 1  | AAC25688.1:O77463.1:AAC25689.1                               | Carbamidomethylation                     | C11:Carbamidomethylation:1000.00;C13:Carbamidomethylation:1000.00                                                            |
| <b>Q(sub A)DVDFGTGIADSIIL(sub K)K</b>                          | 26,28 | 1633,856 | 15 | 0,7  | 817,9359 | 49,38 | 0        | 1 | 16983 | 150211-Fr_I_Helo-red-alk-tryp-001.raw | 3  | 3  | JAW07002.1                                                   |                                          |                                                                                                                              |
| <b>NVLVIAPPD(+17.03)PSVFSDPD</b>                               | 26,25 | 1797,915 | 17 | 0,7  | 899,9653 | 47,42 | 0        | 1 | 16310 | 150211-Fr_I_Helo-red-alk-tryp-001.raw | 1  | 1  | AIJ02118.2                                                   | Replacement of proton with ammonium ion  | D9:Replacement of proton with ammonium ion:9.87                                                                              |
| <b>ASSM(sub G)YCAWPAC(+57.02)YC(+57.02)YGVDPHIK</b>            | 26,25 | 2478,027 | 21 | 0,9  | 827,0169 | 36,09 | 0        | 1 | 12229 | 150211-Fr_I_Helo-red-alk-tryp-001.raw | 2  | 2  | JAW07016.1:JAW06979.1:P68411.1:1913435A:P68410.1:AA B36322.1 | Carbamidomethylation                     | C11:Carbamidomethylation:1000.00;C13:Carbamidomethylation:1000.00                                                            |
| <b>G(sub K)SLLFLTPIFVK</b>                                     | 26,19 | 1420,833 | 13 | -0,5 | 711,4233 | 50,91 | 0        | 1 | 17493 | 150211-Fr_I_Helo-red-alk-tryp-001.raw | 1  | 1  | JAW07036.1                                                   |                                          |                                                                                                                              |
| <b>G(sub K)YLFLTDSNFR</b>                                      | 26,15 | 1331,651 | 11 | -0,8 | 666,8322 | 35,65 | 0        | 1 | 12068 | 150211-Fr_I_Helo-red-alk-tryp-001.raw | 4  | 4  | AIJ02112.2                                                   |                                          |                                                                                                                              |
| <b>APEPAPEAAPEAAPE(+37.03)PAAAAPE</b>                          | 26,14 | 2089,996 | 22 | 2,3  | 697,6741 | 33,74 | 0        | 1 | 11381 | 150211-Fr_I_Helo-red-alk-tryp-001.raw | 1  | 1  | JAW07022.1:P86821.1                                          | Propargylamine                           | E15:Propargylamine:18.48                                                                                                     |
| <b>LTS(+59.02)QSEYAC(+57.02)PAIDKFC(+57.02)EDHC(+57.02)AAK</b> | 26,06 | 2759,181 | 23 | 2,2  | 690,8041 | 18,51 | 0        | 1 | 6094  | 150211-Fr_I_Helo-red-alk-tryp-001.raw | 9  | 9  | P86822.2:POC8W4.2:AFP87551.1                                 | Aminoethylcysteine; Carbamidomethylation | S3:Aminoethylcysteine:0.00;C9:Carbamidomethylation:1000.00;C16:Carbamidomethylation:1000.00;C20:Carbamidomethylation:1000.00 |
| <b>Q(sub A)EIDY(sub F)SGIPEDIK</b>                             | 26,05 | 1618,809 | 14 | -1,8 | 810,4103 | 39,8  | 0        | 1 | 13587 | 150211-Fr_I_Helo-red-alk-tryp-001.raw | 5  | 5  | JAW06987.1:JAW07038.1:JAW06992.1                             |                                          |                                                                                                                              |
| <b>DQ(sub A)DIIMLISNR</b>                                      | 26    | 1316,676 | 11 | -0,2 | 659,345  | 35,91 | 0        | 1 | 12164 | 150211-Fr_I_Helo-red-alk-tryp-001.raw | 1  | 1  | AIJ02110.2:JAG85213.1                                        |                                          |                                                                                                                              |
| <b>TNEALTEYVTQ(+.98)MFTGVQNMYPD(+15.99)NLDIKI</b>              | 25,98 | 3399,556 | 29 | -0,8 | 1134,192 | 49,16 | 0        | 1 | 16906 | 150211-Fr_I_Helo-red-alk-tryp-001.raw | 1  | 1  | JAG85190.1                                                   | Deamidation (NQ); Oxidation (M)          | Q11:Deamidation (NQ):1.44;M23:Oxidation (M):11.12                                                                            |
| <b>AEIDFSGIPED(+356.19)IIK</b>                                 | 25,96 | 1901,981 | 14 | -0,6 | 951,9971 | 50,78 | 0        | 1 | 17450 | 150211-Fr_I_Helo-red-alk-tryp-001.raw | 1  | 1  | JAW06987.1:JAW07038.1:JAW06992.1:P84190.1                    | Biotin polyethyleneoxide amine           | D11:Biotin polyethyleneoxide amine:0.00                                                                                      |
| <b>DQ(sub A)C(+57.02)YC(+57.02)EHLPEVK</b>                     | 25,96 | 1663,697 | 13 | -1,6 | 832,8544 | 30,89 | 0        | 1 | 10373 | 150211-Fr_I_Helo-red-alk-tryp-001.raw | 1  | 1  | JAW07006.1                                                   | Carbamidomethylation                     | C3:Carbamidomethylation:1000.00;C5:Carbamidomethylation:1000.00                                                              |
| <b>APEPAPEAAPEAAPE(+37.95)PAAAAPE</b>                          | 25,87 | 2090,911 | 22 | -0,3 | 697,9774 | 75,04 | 0        | 1 | 25292 | 150211-Fr_I_Helo-red-alk-tryp-001.raw | 1  | 1  | JAW07022.1:P86821.1                                          | Replacement of 2 protons by calcium      | E15:Replacement of 2 protons by calcium:8.15                                                                                 |
| <b>H(sub A)H(sub E)IDFSGIPEDIK</b>                             | 25,85 | 1619,831 | 14 | 1,2  | 810,9236 | 48,6  | 0        | 1 | 16712 | 150211-Fr_I_Helo-red-alk-tryp-001.raw | 1  | 1  | P84190.1                                                     |                                          |                                                                                                                              |
| <b>PEPAPEAAPEAAPEAAAAPE(+144.04)RR</b>                         | 25,81 | 2988,458 | 28 | 4,5  | 997,1642 | 39,11 | 0        | 1 | 13336 | 150211-Fr_I_Helo-red-alk-tryp-001.raw | 1  | 1  | JAW07022.1                                                   | Condensation product of 3-deoxyglucosone | R26:Condensation product of 3-deoxyglucosone:0.00                                                                            |
| <b>APEAAAAPE</b>                                               | 25,77 | 922,4396 | 10 | -0,4 | 462,2269 | 15,75 | 7,78E+07 | 1 | 5054  | 150211-Fr_I_Helo-red-alk-tryp-001.raw | 73 | 73 | JAW07022.1:P86821.1:POC8W6.1                                 |                                          |                                                                                                                              |

J Venom Anim Toxins incl Trop Dis, 2019

|                                                         |       |          |    |      |          |       |          |   |       |                                       |    |    |                                                             |                                                                |                                                                                                                   |
|---------------------------------------------------------|-------|----------|----|------|----------|-------|----------|---|-------|---------------------------------------|----|----|-------------------------------------------------------------|----------------------------------------------------------------|-------------------------------------------------------------------------------------------------------------------|
| <b>EIDFS(+121.04)GIPEDIK</b>                            | 25,57 | 1595,791 | 13 | -1,1 | 798,9017 | 38,32 | 0        | 1 | 13057 | 150211-Fr_I_Helo-red-alk-tryp-001.raw | 1  | 1  | JAW06987.1:JAW07038.1:JAW06992.1:P84190.1                   | Phosphorylation to pyridyl thiol                               | S5:Phosphorylation to pyridyl thiol:1000.00                                                                       |
| <b>LSESEYAC(+57.02)PAIDKFC(+57.02)EDHC(+57.02)AAK</b>   | 25,52 | 2701,146 | 23 | 5,4  | 1351,587 | 15,33 | 0        | 1 | 4900  | 150211-Fr_I_Helo-red-alk-tryp-001.raw | 2  | 2  | Q0GY42.1:ABE98265.1:JAG85223.1                              | Carbamidomethylation                                           | C9:Carbamidomethylation:1000.00;C16:Carbamidomethylation:1000.00;C20:Carbamidomethylation:1000.00                 |
| <b>SLAHEAAHLLAVP(+29.04)HDGDDFKVS</b>                   | 25,5  | 2357,189 | 22 | -1,1 | 590,3039 | 35,91 | 0        | 1 | 12161 | 150211-Fr_I_Helo-red-alk-tryp-001.raw | 3  | 3  | AIJ02111.3                                                  | Dimethylation of proline residue                               | P13:Dimethylation of proline residue:1000.00                                                                      |
| <b>LIPNDQLR</b>                                         | 25,49 | 967,545  | 8  | 0,1  | 484,7798 | 25,92 | 0        | 1 | 8755  | 150211-Fr_I_Helo-red-alk-tryp-001.raw | 18 | 18 | POC2F3.1:P69940.2:Q5G8A6.1:JAG85216.1:AAW72464.1:AAW72465.1 |                                                                |                                                                                                                   |
| <b>PEAAPEAAAAPER(+44.03)</b>                            | 25,42 | 1419,699 | 14 | 4,7  | 710,8603 | 11,58 | 0        | 1 | 3547  | 150211-Fr_I_Helo-red-alk-tryp-001.raw | 3  | 3  | JAW07022.1                                                  | Ethanolation (KR)                                              | R14:Ethanolation (KR):1000.00                                                                                     |
| <b>LTSQSEYAC(+57.02)PAIEK(+43.01)</b>                   | 25,4  | 1638,756 | 14 | -0,1 | 820,3851 | 30,65 | 0        | 1 | 10290 | 150211-Fr_I_Helo-red-alk-tryp-001.raw | 1  | 1  | ABV64385.1:ABE98262.1:Q0GY45.1                              | Carbamidomethylation; Carbamylation                            | C9:Carbamidomethylation:1000.00;K14:Carbamylation:39.87                                                           |
| <b>APEAAPEAAPEP(+15.99)AAAAPE</b>                       | 25,38 | 1674,774 | 18 | -0,7 | 838,3935 | 11,33 | 0        | 1 | 3459  | 150211-Fr_I_Helo-red-alk-tryp-001.raw | 1  | 1  | JAW07022.1:P86821.1                                         | Oxidation or Hydroxylation                                     | P12:Oxidation or Hydroxylation:0.00                                                                               |
| <b>APEPAPEPAPEAPEA</b>                                  | 25,37 | 1568,736 | 16 | -0,9 | 785,3745 | 32,25 | 0        | 1 | 10846 | 150211-Fr_I_Helo-red-alk-tryp-001.raw | 7  | 7  | JAW07022.1:P86821.1:POC8W6.1                                |                                                                |                                                                                                                   |
| <b>KVTCFLTAAGYC(+57.02)NTEC(+57.02)T(sub K)LQK</b>      | 25,28 | 2307,07  | 20 | -0,5 | 1154,542 | 20,46 | 0        | 1 | 6832  | 150211-Fr_I_Helo-red-alk-tryp-001.raw | 2  | 2  | AAW72463.1:Q5G8A8.1                                         | Carbamidomethylation                                           | C12:Carbamidomethylation:1000.00;C16:Carbamidomethylation:1000.00                                                 |
| <b>QIK(+114.04)ETNAKPPA</b>                             | 25,22 | 1309,699 | 11 | 0,4  | 437,5738 | 5,78  | 0        | 1 | 1450  | 150211-Fr_I_Helo-red-alk-tryp-001.raw | 1  | 1  | JAW06987.1:JAW07038.1:JAW06992.1                            | Ubiquitin                                                      | K3:Ubiquitin:0.00                                                                                                 |
| <b>IDFSGIPEDIKR(sub E)</b>                              | 25,21 | 1501,814 | 13 | -0,2 | 501,6118 | 35,95 | 0        | 1 | 12179 | 150211-Fr_I_Helo-red-alk-tryp-001.raw | 1  | 1  | P84190.1                                                    |                                                                |                                                                                                                   |
| <b>AAGYC(+57.02)NTEC(+57.02)TLK</b>                     | 25,2  | 1386,591 | 12 | -2   | 694,3013 | 5,83  | 0        | 1 | 1470  | 150211-Fr_I_Helo-red-alk-tryp-001.raw | 1  | 1  | AAC25688.1:O77463.1:AAW25689.1                              | Carbamidomethylation                                           | C5:Carbamidomethylation:1000.00;C9:Carbamidomethylation:1000.00                                                   |
| <b>GIPEDIK</b>                                          | 25,13 | 883,5015 | 8  | 0,5  | 442,7582 | 30,23 | 0        | 1 | 10148 | 150211-Fr_I_Helo-red-alk-tryp-001.raw | 24 | 24 | JAW06987.1:JAW07038.1:JAW06992.1:P84190.1                   |                                                                |                                                                                                                   |
| <b>AEIDFSGIPEDIK(+117.02)QIK</b>                        | 25,12 | 2032,055 | 17 | -3,4 | 678,3566 | 49,27 | 0        | 1 | 16944 | 150211-Fr_I_Helo-red-alk-tryp-001.raw | 1  | 1  | JAW06987.1:JAW07038.1:JAW06992.1                            | N-Homocysteine thiolactone                                     | K14:N-Homocysteine thiolactone:0.00                                                                               |
| <b>IKETNAKPPA</b>                                       | 25,08 | 1067,597 | 10 | 0,1  | 534,806  | 11,17 | 0        | 1 | 3404  | 150211-Fr_I_Helo-red-alk-tryp-001.raw | 43 | 43 | JAW06987.1:JAW07038.1:JAW06992.1:P84190.1:JAW07002.1        |                                                                |                                                                                                                   |
| <b>AEIDFSGIPEDIKQIKEL(sub T)</b>                        | 24,98 | 2157,157 | 19 | -0,9 | 720,0589 | 51,74 | 8,69E+08 | 1 | 17772 | 150211-Fr_I_Helo-red-alk-tryp-001.raw | 8  | 8  | JAW06987.1:JAW07038.1:JAW06992.1                            |                                                                |                                                                                                                   |
| <b>APEPAPEPAPEP</b>                                     | 24,97 | 1200,566 | 12 | 1,2  | 601,2911 | 31,11 | 0        | 1 | 10449 | 150211-Fr_I_Helo-red-alk-tryp-001.raw | 2  | 2  | JAW07022.1:P86821.1:POC8W6.1                                |                                                                |                                                                                                                   |
| <b>APEPAPEAAPEAAPEP</b>                                 | 24,91 | 1542,72  | 16 | 0,2  | 772,3675 | 14,23 | 0        | 1 | 4494  | 150211-Fr_I_Helo-red-alk-tryp-001.raw | 3  | 3  | JAW07022.1:P86821.1                                         |                                                                |                                                                                                                   |
| <b>KELPEDIK</b>                                         | 24,87 | 970,5334 | 8  | -1,1 | 486,2735 | 27,19 | 0        | 1 | 9162  | 150211-Fr_I_Helo-red-alk-tryp-001.raw | 52 | 52 |                                                             |                                                                |                                                                                                                   |
| <b>A(+380.15)C(+57.02)PAIDKFC(+57.02)EDHC(+57.02)AA</b> | 24,84 | 2143,854 | 15 | -3,9 | 1072,93  | 15,65 | 0        | 1 | 5014  | 150211-Fr_I_Helo-red-alk-tryp-001.raw | 5  | 5  | P86822.2:POC8W4.2:AFP87551.1:Q0GY42.1:ABE98265.1:JAG85223.1 | Nucleophilic addition to cytopiloyne+H2O; Carbamidomethylation | A1:Nucleophilic addition to cytopiloyne+H2O:53.33;C2:Carbamidomethylation:1000.00;C9:Carbamidomethylation:1000.00 |

J Venom Anim Toxins incl Trop Dis, 2019

|                                                           |       |          |    |      |          |       |          |   |       |                                       |   |   |                                           |                                                            |                                                                                                                        |  |                                          |
|-----------------------------------------------------------|-------|----------|----|------|----------|-------|----------|---|-------|---------------------------------------|---|---|-------------------------------------------|------------------------------------------------------------|------------------------------------------------------------------------------------------------------------------------|--|------------------------------------------|
|                                                           |       |          |    |      |          |       |          |   |       |                                       |   |   |                                           |                                                            |                                                                                                                        |  | .00;C13:Carbamidomethylatio<br>n:1000.00 |
| <b>PAPEAAPEAAPEAAAAAPER(+199.07)</b>                      | 24,75 | 2110,999 | 20 | -4,9 | 1056,502 | 33,98 | 0        | 1 | 11469 | 150211-Fr_I_Helo-red-alk-tryp-001.raw | 2 | 2 | JAW07022.1                                | Oxidized Arginine biotinylated with biotin hydrazide       | R20:Oxidized Arginine biotinylated with biotin hydrazide:1000.00                                                       |  |                                          |
| <b>IW(+13.98)TSETNK</b>                                   | 24,71 | 991,4611 | 8  | -1,5 | 496,7371 | 5,81  | 0        | 1 | 1460  | 150211-Fr_I_Helo-red-alk-tryp-001.raw | 1 | 1 | AAC25688.1:O77463.1:AAC25689.1            | Tryptophan oxidation to oxolactone                         | W2:Tryptophan oxidation to oxolactone:1000.00                                                                          |  |                                          |
| <b>PEPAPEAAPEAAPEAAAAAPER(+44.03)</b>                     | 24,6  | 2182,054 | 22 | 1,8  | 1092,036 | 14,55 | 0        | 1 | 4612  | 150211-Fr_I_Helo-red-alk-tryp-001.raw | 1 | 1 | JAW07022.1                                | Ethanolation (KR)                                          | R22:Ethanolation (KR):1000.00                                                                                          |  |                                          |
| <b>APEPAPEAAPEAAPEAAPE(+129.04)PAAAAPEERRR</b>            | 24,57 | 3044,495 | 29 | 0,8  | 1015,84  | 41,47 | 0        | 1 | 14192 | 150211-Fr_I_Helo-red-alk-tryp-001.raw | 1 | 1 | JAW07022.1                                | Monoglutamyl                                               | E19:Monoglutamyl:0.00                                                                                                  |  |                                          |
| <b>PEPAPEAAPEPVAAAAAPER(-.98)</b>                         | 24,56 | 1867,943 | 19 | 1,1  | 934,9797 | 37,9  | 9,36E+08 | 1 | 12897 | 150211-Fr_I_Helo-red-alk-tryp-001.raw | 1 | 1 | JAG85215.1                                | Amidation                                                  | R19:Amidation:1000.00                                                                                                  |  |                                          |
| <b>LAPEPAPEPAP</b>                                        | 24,49 | 1087,555 | 11 | 0,2  | 544,7849 | 31,42 | 0        | 1 | 10555 | 150211-Fr_I_Helo-red-alk-tryp-001.raw | 2 | 2 | JAW07022.1:P86821.1                       |                                                            |                                                                                                                        |  |                                          |
| <b>PEAAPEAAAAPEERRR(+380.15)</b>                          | 24,48 | 2068,023 | 16 | -2,4 | 690,3464 | 33,81 | 0        | 1 | 11407 | 150211-Fr_I_Helo-red-alk-tryp-001.raw | 2 | 2 | JAW07022.1                                | Nucleophilic addition to cytopiloyne+H2O                   | R16:Nucleophilic addition to cytopiloyne+H2O:0.00                                                                      |  |                                          |
| <b>WADQ(sub E)T(sub V)LNLDDFETIR</b>                      | 24,47 | 1835,869 | 15 | 4    | 918,9454 | 47,34 | 0        | 1 | 16282 | 150211-Fr_I_Helo-red-alk-tryp-001.raw | 1 | 1 | JAW07036.1:JAW06986.1                     |                                                            |                                                                                                                        |  |                                          |
| <b>ITC(+57.02)FLT(-18.01)AAGYC(+57.02)NTEC(+57.02)TLK</b> | 24,45 | 2103,943 | 18 | -0,4 | 1052,978 | 47,54 | 0        | 1 | 16352 | 150211-Fr_I_Helo-red-alk-tryp-001.raw | 1 | 1 | AAC25688.1:O77463.1:AAC25689.1            | Carbamidomethylation; Dehydration                          | C3:Carbamidomethylation:100.0.00;T6:Dehydration:0.00;C11:Carbamidomethylation:1000.00;C15:Carbamidomethylation:1000.00 |  |                                          |
| <b>E(sub A)IITVV DNGIMIGC(+57.02)GIF DVASPSVK</b>         | 24,44 | 2633,345 | 25 | 5,3  | 878,7934 | 49,05 | 0        | 1 | 16867 | 150211-Fr_I_Helo-red-alk-tryp-001.raw | 1 | 1 | JAW07019.1:JAW06978.1                     | Carbamidomethylation                                       | C14:Carbamidomethylation:1000.00                                                                                       |  |                                          |
| <b>AEIDFSGIPEDIKQIK(+14.02)ET(-.98)</b>                   | 24,43 | 2158,152 | 19 | 1,4  | 720,3923 | 50    | 0        | 1 | 17192 | 150211-Fr_I_Helo-red-alk-tryp-001.raw | 4 | 4 | JAW06987.1:JAW07038.1:JAW06992.1          | Methylation(KR); Amidation                                 | K17:Methylation(KR):0.00;T19:Amidation:1000.00                                                                         |  |                                          |
| <b>DADIIMLTDRPLADIS(+58.03)SEGK</b>                       | 24,37 | 2318,155 | 21 | -3,3 | 773,7231 | 34,16 | 0        | 1 | 11534 | 150211-Fr_I_Helo-red-alk-tryp-001.raw | 8 | 8 | AIJ02113.2                                | 2 3-dihydro-2 2-dimethyl-7-benzofuranol N-methyl carbamate | S17:2 3-dihydro-2 2-dimethyl-7-benzofuranol N-methyl carbamate:14.02                                                   |  |                                          |
| <b>ADVDFGTIADS(-18.01)IHK(-.98)</b>                       | 24,37 | 1444,756 | 14 | 0,2  | 723,3855 | 11,76 | 0        | 1 | 3611  | 150211-Fr_I_Helo-red-alk-tryp-001.raw | 3 | 3 | JAW07002.1:P86824.1                       | Dehydration; Amidation                                     | S11:Dehydration:0.00;K14:Amidation:1000.00                                                                             |  |                                          |
| <b>EIDFS(+340.09)GIPEDIK</b>                              | 24,36 | 1814,841 | 13 | 1    | 908,4288 | 48,22 | 0        | 1 | 16582 | 150211-Fr_I_Helo-red-alk-tryp-001.raw | 1 | 1 | JAW06987.1:JAW07038.1:JAW06992.1:P84190.1 | Phosphopantetheine                                         | S5:Phosphopantetheine:1000.00                                                                                          |  |                                          |
| <b>KEALAPEPAK(+170.04)PAPEP</b>                           | 24,34 | 1810,914 | 16 | 0,9  | 906,4651 | 33,27 | 0        | 1 | 11213 | 150211-Fr_I_Helo-red-alk-tryp-001.raw | 1 | 1 | POC8W6.1                                  | Menadione quinone derivative                               | K11:Menadione quinone derivative:84.36                                                                                 |  |                                          |
| <b>DGLCAFLIGR</b>                                         | 24,19 | 1063,549 | 10 | 3,6  | 532,7834 | 32,55 | 0        | 1 | 10953 | 150211-Fr_I_Helo-red-alk-tryp-001.raw | 1 | 1 | JAG85161.1                                |                                                            |                                                                                                                        |  |                                          |
| <b>KKQNEPSFIEDSAIPGHQQLDP VDLVK</b>                       | 24,08 | 3130,63  | 28 | 4,2  | 1044,555 | 38,03 | 0        | 1 | 12947 | 150211-Fr_I_Helo-red-alk-tryp-001.raw | 1 | 1 | AIJ02110.2                                |                                                            |                                                                                                                        |  |                                          |
| <b>EALAPE(+17.03)PAPEPAPEP</b>                            | 24,08 | 1530,757 | 15 | -0,7 | 766,3849 | 26,08 | 0        | 1 | 8807  | 150211-Fr_I_Helo-red-alk-tryp-001.raw | 1 | 1 | JAW07022.1:P86821.1                       | Replacement of proton with ammonium ion                    | E6:Replacement of proton with ammonium ion:6.29                                                                        |  |                                          |
| <b>ITC(+57.02)FLTAAGYC(+57.02)NTEC(+57.02)TLG(sub K)K</b> | 23,96 | 2178,975 | 19 | -2,5 | 1090,492 | 35,51 | 0        | 1 | 12018 | 150211-Fr_I_Helo-red-alk-tryp-001.raw | 1 | 1 | AAC25688.1:O77463.1:AAC25689.1            | Carbamidomethylation                                       | C3:Carbamidomethylation:100.00;C11:Carbamidomethylati                                                                  |  |                                          |

J Venom Anim Toxins incl Trop Dis, 2019

|                                                              |       |          |    |      |          |       |          |   |       |                                       |     |     |                                                                    |                                                               |                                                                                                                                                       |                                             |
|--------------------------------------------------------------|-------|----------|----|------|----------|-------|----------|---|-------|---------------------------------------|-----|-----|--------------------------------------------------------------------|---------------------------------------------------------------|-------------------------------------------------------------------------------------------------------------------------------------------------------|---------------------------------------------|
|                                                              |       |          |    |      |          |       |          |   |       |                                       |     |     |                                                                    |                                                               |                                                                                                                                                       | on:1000.00;C15:Carbamidomethylation:1000.00 |
| <b>APEAAPEAAAAPE(+17.03)</b>                                 | 23,94 | 1307,636 | 14 | -0,3 | 654,8249 | 15,67 | 7,98E+08 | 1 | 5021  | 150211-Fr_I_Helo-red-alk-tryp-001.raw | 127 | 127 | JAW07022.1:P86821.1:POC8W6.1                                       | Replacement of proton with ammonium ion                       | E14:Replacement of proton with ammonium ion:47.00                                                                                                     |                                             |
| <b>LAPEPAPEPAPE(+21.98)PAPEA</b>                             | 23,92 | 1703,802 | 17 | 1,5  | 852,9094 | 34,21 | 0        | 1 | 11555 | 150211-Fr_I_Helo-red-alk-tryp-001.raw | 1   | 1   | JAW07022.1:P86821.1                                                | Sodium adduct                                                 | E12:Sodium adduct:11.12                                                                                                                               |                                             |
| <b>EALAPEPAPE(+17.03)P</b>                                   | 23,87 | 1136,571 | 11 | 0,7  | 569,2933 | 31,97 | 0        | 1 | 10745 | 150211-Fr_I_Helo-red-alk-tryp-001.raw | 2   | 2   | JAW07022.1:P86821.1                                                | Replacement of proton with ammonium ion                       | E10:Replacement of proton with ammonium ion:0.00                                                                                                      |                                             |
| <b>EALAPE(+17.03)PAPEPAPEPAPEA</b>                           | 23,83 | 1898,926 | 19 | -1,3 | 950,4691 | 74,89 | 0        | 1 | 25246 | 150211-Fr_I_Helo-red-alk-tryp-001.raw | 1   | 1   | JAW07022.1:P86821.1                                                | Replacement of proton with ammonium ion                       | E6:Replacement of proton with ammonium ion:0.00                                                                                                       |                                             |
| <b>PEPAPKPAPEPAPEPAPEPAPEA APEAAAAPE</b>                     | 23,82 | 3189,551 | 33 | 0,5  | 1064,191 | 43,42 | 0        | 1 | 14895 | 150211-Fr_I_Helo-red-alk-tryp-001.raw | 16  | 16  | POC8W6.1                                                           |                                                               |                                                                                                                                                       |                                             |
| <b>GSSGYC(+57.02)AWPAC(+57.02)YC(+57.02)YGLP(-27.99)DSVP</b> | 23,69 | 2337,949 | 21 | 2,5  | 1169,985 | 44,28 | 0        | 1 | 15207 | 150211-Fr_I_Helo-red-alk-tryp-001.raw | 1   | 1   |                                                                    | Carbamidomethylation; Pyrrolidone from Proline                | C6:Carbamidomethylation:1000.00;C11:Carbamidomethylation:1000.00;C13:Carbamidomethylation:1000.00;P17:Pyrrolidone from Proline:0.00                   |                                             |
| <b>KKVNEPSFIGDS(+86.00)AILGH QQLDVPDLVK</b>                  | 23,68 | 3131,65  | 28 | -4,7 | 627,3344 | 37,84 | 0        | 1 | 12877 | 150211-Fr_I_Helo-red-alk-tryp-001.raw | 2   | 2   | JAG85213.1                                                         | Malonylation                                                  | S12:Malonylation:0.00                                                                                                                                 |                                             |
| <b>K(+43.01)(+14.02)EGYAMDHEGC(+57.02)K</b>                  | 23,61 | 1480,607 | 12 | -1   | 741,3102 | 6,97  | 3,49E+06 | 1 | 1877  | 150211-Fr_I_Helo-red-alk-tryp-001.raw | 2   | 2   | P68411.1:1913435A:P68410.1:AAB36322.1:AAW72453.1:Q5G8B8.1:P60276.1 | Carbamylation; Methylation(KR); Carbamidomethylation          | K1:Carbamylation:48.34;K1:Methylation(KR):50.04;C11:Carbamidomethylation:1000.00                                                                      |                                             |
| <b>AEIDFSGIPED(+17.03)II</b>                                 | 23,49 | 1434,724 | 13 | -1   | 718,3687 | 46,93 | 0        | 1 | 16139 | 150211-Fr_I_Helo-red-alk-tryp-001.raw | 2   | 2   | JAW06987.1:JAW07038.1:JAW06992.1:P84190.1                          | Replacement of proton with ammonium ion                       | D11:Replacement of proton with ammonium ion:0.00                                                                                                      |                                             |
| <b>AQVIGITPF(+21.98)</b>                                     | 23,41 | 966,515  | 9  | -0,1 | 484,2647 | 32,92 | 0        | 1 | 11084 | 150211-Fr_I_Helo-red-alk-tryp-001.raw | 1   | 1   | AIJ02110.2:JAG85213.1                                              | Sodium adduct                                                 | F9:Sodium adduct:1000.00                                                                                                                              |                                             |
| <b>EAPEPAAAAAPEAAPE</b>                                      | 23,38 | 1490,689 | 16 | -2   | 746,3502 | 13,15 | 0        | 1 | 4106  | 150211-Fr_I_Helo-red-alk-tryp-001.raw | 2   | 2   | POC8W6.1                                                           |                                                               |                                                                                                                                                       |                                             |
| <b>A(+88.00)EIDFSGIPEDIK</b>                                 | 23,36 | 1633,791 | 14 | 1    | 817,9035 | 65,52 | 0        | 1 | 22226 | 150211-Fr_I_Helo-red-alk-tryp-001.raw | 1   | 1   | JAW06987.1:JAW07038.1:JAW06992.1:P84190.1                          | 3-sulfanylpropanoyl                                           | A1:3-sulfanylpropanoyl:39.02                                                                                                                          |                                             |
| <b>AEIDFSGIPEDIKQIKETNAKPPAR(+132.02)</b>                    | 23,35 | 3011,56  | 26 | -3,5 | 1004,857 | 38,49 | 0        | 1 | 13114 | 150211-Fr_I_Helo-red-alk-tryp-001.raw | 3   | 3   | JAW06987.1:JAW07038.1:JAW06992.1                                   | Hydroxyphenylglyoxal arginine                                 | R26:Hydroxyphenylglyoxal arginine:1000.00                                                                                                             |                                             |
| <b>APEAAPEAAPEAAAAPE(+453.21)</b>                            | 23,31 | 2111,991 | 18 | 0,4  | 1057,003 | 16,56 | 0        | 1 | 5353  | 150211-Fr_I_Helo-red-alk-tryp-001.raw | 1   | 1   | JAW07022.1:P86821.1                                                | Puromycin                                                     | E18:Puromycin:1000.00                                                                                                                                 |                                             |
| <b>A(+164.06)NLGEFPWMVFIR</b>                                | 23,3  | 1742,862 | 13 | 3,7  | 872,4415 | 56,9  | 0        | 1 | 19467 | 150211-Fr_I_Helo-red-alk-tryp-001.raw | 1   | 1   | JAG85164.1                                                         | O-Diisopropylphosphorylation                                  | A1:O-Diisopropylphosphorylation:1000.00                                                                                                               |                                             |
| <b>GSSGYC(+57.02)AWPAC(+57.02)YC(+57.02)YGLPD(+17.03)</b>    | 23,22 | 2099,818 | 18 | 0    | 1050,916 | 44,64 | 0        | 1 | 15331 | 150211-Fr_I_Helo-red-alk-tryp-001.raw | 1   | 1   | AAC25688.1:O77463.1:AAW72453.1                                     | Carbamidomethylation; Replacement of proton with ammonium ion | C6:Carbamidomethylation:1000.00;C11:Carbamidomethylation:1000.00;C13:Carbamidomethylation:1000.00;D18:Replacement of proton with ammonium ion:1000.00 |                                             |
| <b>PSFIEDSAIPGHQQLDVPDLVK(+127.06)NM</b>                     | 23,21 | 2875,443 | 25 | -0,8 | 959,4874 | 48,28 | 0        | 1 | 16604 | 150211-Fr_I_Helo-red-alk-tryp-001.raw | 8   | 8   | AIJ02110.2                                                         | N-Succinimidyl-2-morpholine acetate                           | K23:N-Succinimidyl-2-morpholine acetate:23.92                                                                                                         |                                             |

J Venom Anim Toxins incl Trop Dis, 2019

|                                                        |       |          |    |      |          |       |   |   |       |                                       |   |   |                                                                                                                |                                                            |                                                                                                                          |
|--------------------------------------------------------|-------|----------|----|------|----------|-------|---|---|-------|---------------------------------------|---|---|----------------------------------------------------------------------------------------------------------------|------------------------------------------------------------|--------------------------------------------------------------------------------------------------------------------------|
| <b>APEAAPEAAPE(+17.03)PAAAAPE</b>                      | 23,2  | 1675,805 | 18 | 0,2  | 838,91   | 27,39 | 0 | 1 | 9227  | 150211-Fr_I_Helo-red-alk-tryp-001.raw | 3 | 3 | JAW07022.1:P86821.1                                                                                            | Replacement of proton with ammonium ion                    | E11:Replacement of proton with ammonium ion:0.00                                                                         |
| <b>EALAPEPAK(+218.17)PAPEPAPEPAP</b>                   | 23,17 | 2293,224 | 21 | -4,9 | 765,4116 | 33,63 | 0 | 1 | 11340 | 150211-Fr_I_Helo-red-alk-tryp-001.raw | 1 | 1 | POC8W6.1                                                                                                       | Michael addition of BHT quinone methide                    | K10:Michael addition of BHT quinone methide:1000.00                                                                      |
| <b>R(sub A)EN(sub I)DFSGIPEDIK</b>                     | 23,16 | 1631,815 | 14 | -0,7 | 816,9144 | 46,72 | 0 | 1 | 16065 | 150211-Fr_I_Helo-red-alk-tryp-001.raw | 1 | 1 | P84190.1                                                                                                       |                                                            |                                                                                                                          |
| <b>KEALAPEPAPE(+21.98)P</b>                            | 23,11 | 1269,622 | 12 | -0,5 | 635,8177 | 13,2  | 0 | 1 | 4123  | 150211-Fr_I_Helo-red-alk-tryp-001.raw | 3 | 3 | JAW07022.1:P86821.1                                                                                            | Sodium adduct                                              | E11:Sodium adduct:24.44                                                                                                  |
| <b>S(+71.04)LEDEQENMEERAIDFSGIPEDIK</b>                | 23,08 | 3106,429 | 26 | -4,5 | 1036,479 | 49,2  | 0 | 1 | 16920 | 150211-Fr_I_Helo-red-alk-tryp-001.raw | 1 | 1 | JAW06987.1:JAW07038.1:JAW06992.1                                                                               | Propionamide (K X@N-term)                                  | S1:Propionamide (K X@N-term):39.42                                                                                       |
| <b>ADVDFGTGIADSIKKIKE(+212.01)TNAKPPAR</b>             | 23,08 | 3009,542 | 26 | 0,5  | 1004,189 | 38,26 | 0 | 1 | 13032 | 150211-Fr_I_Helo-red-alk-tryp-001.raw | 2 | 2 | JAW07002.1                                                                                                     | phosphate-ribosylation                                     | E18:phosphate-ribosylation:0.00                                                                                          |
| <b>PEAAPEAAAAPER(+14.02)RR</b>                         | 23,06 | 1701,891 | 16 | 0,1  | 851,9529 | 36,85 | 0 | 1 | 12511 | 150211-Fr_I_Helo-red-alk-tryp-001.raw | 1 | 1 | JAW07022.1                                                                                                     | Methylation(KR)                                            | R14:Methylation(KR):0.00                                                                                                 |
| <b>KC(+57.02)DDFK</b>                                  | 23,06 | 811,3534 | 6  | 0,3  | 406,6841 | 5,69  | 0 | 1 | 1420  | 150211-Fr_I_Helo-red-alk-tryp-001.raw | 1 | 1 | P86822.2:POC8W4.2:AFP87551.1:Q0GY42.1:ABE98265.1:JAG85223.1:ABV64385.1:ABE98262.1:Q0GY45.1:Q0GY43.1:ABE98264.1 | Carbamidomethylation                                       | C2:Carbamidomethylation:1000.00                                                                                          |
| <b>PEAAPEAAAAPER(-43.05)R</b>                          | 23,03 | 1488,721 | 15 | -2,1 | 745,3661 | 38,67 | 0 | 1 | 13178 | 150211-Fr_I_Helo-red-alk-tryp-001.raw | 1 | 1 | JAW07022.1                                                                                                     | Arginine oxidation to glutamic semialdehyde                | R14:Arginine oxidation to glutamic semialdehyde:0.00                                                                     |
| <b>E(-18.01)TNAKPPA</b>                                | 23,01 | 808,4079 | 8  | 0,2  | 405,2113 | 5,71  | 0 | 1 | 1425  | 150211-Fr_I_Helo-red-alk-tryp-001.raw | 1 | 1 | JAW06987.1:JAW07038.1:JAW06992.1:P84190.1:JAW07002.1                                                           | Pyro-glu from E                                            | E1:Pyro-glu from E:1000.00                                                                                               |
| <b>PPDPSVFSDDPRDIELAK(+27.99)K</b>                     | 23    | 2153,064 | 19 | -0,4 | 1077,539 | 46,12 | 0 | 1 | 15855 | 150211-Fr_I_Helo-red-alk-tryp-001.raw | 1 | 1 | AIJ02118.2                                                                                                     | Formylation                                                | K18:Formylation:0.00                                                                                                     |
| <b>EY(sub S)AKYLLSLPR</b>                              | 22,97 | 1351,75  | 11 | -2,9 | 451,5893 | 13,66 | 0 | 1 | 4287  | 150211-Fr_I_Helo-red-alk-tryp-001.raw | 1 | 1 |                                                                                                                |                                                            |                                                                                                                          |
| <b>APEPAPEPAPEAAPEAAPEAAAAPER(-42.02)</b>              | 22,93 | 2955,414 | 31 | 3,7  | 986,1488 | 38,17 | 0 | 1 | 12999 | 150211-Fr_I_Helo-red-alk-tryp-001.raw | 1 | 1 | JAW07022.1                                                                                                     | Ornithine from Arginine                                    | R31:Ornithine from Arginine:1000.00                                                                                      |
| <b>IDFS(+58.03)GIPEDIK</b>                             | 22,92 | 1403,742 | 12 | -1,2 | 702,8775 | 40,03 | 0 | 1 | 13671 | 150211-Fr_I_Helo-red-alk-tryp-001.raw | 3 | 3 | JAW06987.1:JAW07038.1:JAW06992.1:P84190.1                                                                      | 2 3-dihydro-2 2-dimethyl-7-benzofuranol N-methyl carbamate | S4:2 3-dihydro-2 2-dimethyl-7-benzofuranol N-methyl carbamate:1000.00                                                    |
| <b>DC(+57.02)PEN(+30.01)DGYIMGSGNNK</b>                | 22,92 | 1799,709 | 16 | 0,6  | 900,8624 | 6,57  | 0 | 1 | 1732  | 150211-Fr_I_Helo-red-alk-tryp-001.raw | 2 | 2 | JAG85213.1                                                                                                     | Carbamidomethylation; Hydroxymethyl                        | C2:Carbamidomethylation:1000.00;N5:Hydroxymethyl:12.36                                                                   |
| <b>Y(sub F)ATDN(sub E)ALQHMTLTYVK</b>                  | 22,91 | 1968,962 | 17 | 3,9  | 985,4919 | 34,46 | 0 | 1 | 11645 | 150211-Fr_I_Helo-red-alk-tryp-001.raw | 2 | 2 | AIJ02113.2                                                                                                     |                                                            |                                                                                                                          |
| <b>PAPEPAPEAAPEAAPEAAAAPER(+453.21)</b>                | 22,84 | 2915,431 | 25 | -0,7 | 1458,722 | 36,75 | 0 | 1 | 12474 | 150211-Fr_I_Helo-red-alk-tryp-001.raw | 2 | 2 | JAW07022.1                                                                                                     | Puromycin                                                  | R25:Puromycin:1000.00                                                                                                    |
| <b>SC(+57.02)FIRPAGFC(+57.02)DGYC(+57.02)K(+56.06)</b> | 22,75 | 1892,837 | 15 | -2,2 | 631,9516 | 34,38 | 0 | 1 | 11616 | 150211-Fr_I_Helo-red-alk-tryp-001.raw | 1 | 1 | JAW07016.1:JAW06979.1:P68411.1:1913435A:P68410.1:AA B36322.1                                                   | Carbamidomethylation; Diethylation                         | C2:Carbamidomethylation:1000.00;C10:Carbamidomethylation:1000.00;C14:Carbamidomethylation:1000.00;K15:Diethylation:39.78 |

J Venom Anim Toxins incl Trop Dis, 2019

|                                                                         |       |          |    |      |          |       |   |   |       |                                       |    |    |                                                      |                                                           |                                                                                                    |
|-------------------------------------------------------------------------|-------|----------|----|------|----------|-------|---|---|-------|---------------------------------------|----|----|------------------------------------------------------|-----------------------------------------------------------|----------------------------------------------------------------------------------------------------|
| <b>AEIDFSGIPEDIKQIKETNAKPPA RF(+123.01)</b>                             | 22,73 | 3149,616 | 27 | -2,6 | 1575,811 | 39,89 | 0 | 1 | 13617 | 150211-Fr_I_Helo-red-alk-tryp-001.raw | 6  | 6  | JAW06987.1:JAW07038.1:JAW06992.1                     | glycosylphosphatidylinositol                              | F27:glycosylphosphatidylinositol:1000.00                                                           |
| <b>EALAPEPAPEPAPEPAEAAAP</b>                                            | 22,7  | 2049,989 | 21 | 1    | 684,3377 | 35,6  | 0 | 1 | 12050 | 150211-Fr_I_Helo-red-alk-tryp-001.raw | 1  | 1  | JAW07022.1:P86821.1                                  |                                                           |                                                                                                    |
| <b>WS(sub A)DN(sub E)VLNLDDEFETIR</b>                                   | 22,69 | 1835,869 | 15 | 4,5  | 918,9459 | 47,09 | 0 | 1 | 16194 | 150211-Fr_I_Helo-red-alk-tryp-001.raw | 2  | 2  | JAW07036.1:JAW06986.1                                |                                                           |                                                                                                    |
| <b>EPAPEPAPEPAPE(+356.19)AAP E</b>                                      | 22,66 | 2053,967 | 17 | -3,4 | 1027,987 | 18,74 | 0 | 1 | 6181  | 150211-Fr_I_Helo-red-alk-tryp-001.raw | 8  | 8  | JAW07022.1:P86821.1:POC8W6.1                         | Biotin polyethyleneoxide amine                            | E13:Biotin polyethyleneoxide amine:15.39                                                           |
| <b>G(sub K)YFFFLPQASC(+57.02)LR</b>                                     | 22,56 | 1558,76  | 13 | -0,4 | 780,3871 | 38,26 | 0 | 1 | 13035 | 150211-Fr_I_Helo-red-alk-tryp-001.raw | 1  | 1  | JAW07039.1                                           | Carbamidomethylation                                      | C11:Carbamidomethylation:1000.00                                                                   |
| <b>LPSAAN(+203.08)MMQ(+.98)MEWDELAIAQAHANQC(+57.02)K</b>                | 22,54 | 3347,457 | 28 | -4,5 | 670,4956 | 14,73 | 0 | 1 | 4678  | 150211-Fr_I_Helo-red-alk-tryp-001.raw | 1  | 1  | JAG85161.1                                           | HexNAcylation (N); Deamidation (NQ); Carbamidomethylation | N6:HexNAcylation (N):32.45;Q9:Deamidation (NQ):16.22;C27:Carbamidomethylation:1000.00              |
| <b>SDVTGGFPVNY(sub S)NNCIYPC(+57.02)YSTQDEIQC(+57.02)EEFC(+57.02)EK</b> | 22,51 | 3965,617 | 33 | 2,1  | 1322,882 | 44,83 | 0 | 1 | 15400 | 150211-Fr_I_Helo-red-alk-tryp-001.raw | 2  | 2  | JAW07006.1                                           | Carbamidomethylation                                      | C18:Carbamidomethylation:1000.00;C27:Carbamidomethylation:1000.00;C31:Carbamidomethylation:1000.00 |
| <b>Q(sub A)EIDFSGIE(sub P)EDIK</b>                                      | 22,48 | 1634,804 | 14 | -2,2 | 818,4074 | 39,6  | 0 | 1 | 13516 | 150211-Fr_I_Helo-red-alk-tryp-001.raw | 1  | 1  | JAW06987.1:JAW07038.1:JAW06992.1                     |                                                           |                                                                                                    |
| <b>M(sub R)M(sub A)EIDFSGIPEDIK</b>                                     | 22,44 | 1736,836 | 15 | -0,8 | 869,4248 | 47,67 | 0 | 1 | 16395 | 150211-Fr_I_Helo-red-alk-tryp-001.raw | 1  | 1  | JAW06987.1:JAW07038.1:JAW06992.1                     |                                                           |                                                                                                    |
| <b>IWTSETN(+.98)K(-.98)</b>                                             | 22,43 | 977,4818 | 8  | 0,3  | 489,7484 | 72,79 | 0 | 1 | 24572 | 150211-Fr_I_Helo-red-alk-tryp-001.raw | 1  | 1  | AAC25688.1:O77463.1: AAC25689.1                      | Deamidation (NQ); Amidation                               | N7:Deamidation (NQ):1000.00;K8:Amidation:1000.00                                                   |
| <b>LIQ(sub E)QGDVLAAR</b>                                               | 22,42 | 1295,756 | 12 | 0,6  | 648,8857 | 32,26 | 0 | 1 | 10850 | 150211-Fr_I_Helo-red-alk-tryp-001.raw | 7  | 7  | XP_023239442.1                                       |                                                           |                                                                                                    |
| <b>PEAAPEAAAAPE</b>                                                     | 22,37 | 1219,572 | 13 | -0,8 | 610,7928 | 13,77 | 0 | 1 | 4328  | 150211-Fr_I_Helo-red-alk-tryp-001.raw | 14 | 14 | JAW07022.1:P86821.1:POC8W6.1                         |                                                           |                                                                                                    |
| <b>M(sub A)EM(ins)IDFSGIPEDIK</b>                                       | 22,34 | 1736,836 | 15 | 0,7  | 869,4261 | 48,33 | 0 | 1 | 16621 | 150211-Fr_I_Helo-red-alk-tryp-001.raw | 1  | 1  | P84190.1                                             |                                                           |                                                                                                    |
| <b>KEALAPEPAK(+58.01)PAPEPA</b>                                         | 22,32 | 1769,92  | 17 | 0    | 590,9806 | 31,14 | 0 | 1 | 10459 | 150211-Fr_I_Helo-red-alk-tryp-001.raw | 1  | 1  | POC8W6.1                                             | Carboxymethyl (KW X@N-term)                               | K11:Carboxymethyl (KW X@N-term):88.74                                                              |
| <b>SSLLFLTPIFVK(+21.98)</b>                                             | 22,31 | 1385,794 | 12 | 1,2  | 693,9048 | 50,25 | 0 | 1 | 17276 | 150211-Fr_I_Helo-red-alk-tryp-001.raw | 1  | 1  | JAW07036.1                                           | Sodium adduct                                             | K12:Sodium adduct:1000.00                                                                          |
| <b>VGTFDASGAFMENK</b>                                                   | 22,27 | 1472,661 | 14 | -1,6 | 737,3364 | 24,44 | 0 | 1 | 8266  | 150211-Fr_I_Helo-red-alk-tryp-001.raw | 1  | 1  |                                                      |                                                           |                                                                                                    |
| <b>KEALAPE(+37.95)PAPEP</b>                                             | 22,24 | 1285,587 | 12 | 0,1  | 643,8007 | 30,75 | 0 | 1 | 10327 | 150211-Fr_I_Helo-red-alk-tryp-001.raw | 1  | 1  | JAW07022.1:P86821.1                                  | Replacement of 2 protons by calcium                       | E7:Replacement of 2 protons by calcium:35.20                                                       |
| <b>Q(sub A)EIDFSGIPEDIIG(sub K)QIK</b>                                  | 22,21 | 1900,978 | 17 | -1,5 | 634,6657 | 50,02 | 0 | 1 | 17197 | 150211-Fr_I_Helo-red-alk-tryp-001.raw | 2  | 2  | JAW06987.1:JAW07038.1:JAW06992.1                     |                                                           |                                                                                                    |
| <b>E(+21.98)TNAKPPA</b>                                                 | 22,17 | 848,4004 | 8  | -0,5 | 425,2072 | 22,84 | 0 | 1 | 7705  | 150211-Fr_I_Helo-red-alk-tryp-001.raw | 6  | 6  | JAW06987.1:JAW07038.1:JAW06992.1:P84190.1:JAW07002.1 | Sodium adduct                                             | E1:Sodium adduct:17.62                                                                             |
| <b>APEPAPEAAPEAAPE(+17.03)PAAAP</b>                                     | 22,13 | 1940,948 | 21 | -1,3 | 971,48   | 34,36 | 0 | 1 | 11608 | 150211-Fr_I_Helo-red-alk-tryp-001.raw | 1  | 1  | JAW07022.1:P86821.1                                  | Replacement of proton with ammonium ion                   | E15:Replacement of proton with ammonium ion:0.00                                                   |

J Venom Anim Toxins incl Trop Dis, 2019

|                                                          |       |          |    |      |          |       |   |   |       |                                       |    |    |                                                                                                                            |                                                                                                                                                                                                                         |
|----------------------------------------------------------|-------|----------|----|------|----------|-------|---|---|-------|---------------------------------------|----|----|----------------------------------------------------------------------------------------------------------------------------|-------------------------------------------------------------------------------------------------------------------------------------------------------------------------------------------------------------------------|
| DVDFGTGIADSIIL(sub K)K                                   | 22,1  | 1505,798 | 14 | 0,1  | 753,9062 | 50,14 | 0 | 1 | 17237 | 150211-Fr_I_Helo-red-alk-tryp-001.raw | 1  | 1  | JAW07002.1                                                                                                                 |                                                                                                                                                                                                                         |
| G(sub K)IWTSETNK                                         | 22,03 | 1034,503 | 9  | 0,1  | 518,259  | 17,47 | 0 | 1 | 5698  | 150211-Fr_I_Helo-red-alk-tryp-001.raw | 43 | 43 | AAC25688.1:O77463.1:AAC25689.1                                                                                             |                                                                                                                                                                                                                         |
| DNLIPGPPAAFDPDVL                                         | 22,02 | 1649,83  | 16 | -0,2 | 825,9221 | 49,77 | 0 | 1 | 17113 | 150211-Fr_I_Helo-red-alk-tryp-001.raw | 1  | 1  | AIJ02109.2:P86392.3:V9Z9A3.1:AHE40589.1:AHE40588.1:JAG85220.1                                                              |                                                                                                                                                                                                                         |
| AN(sub D)T(sub V)DFTGIADSIKK                             | 21,91 | 1592,841 | 15 | 4,7  | 531,9567 | 36,52 | 0 | 1 | 12385 | 150211-Fr_I_Helo-red-alk-tryp-001.raw | 1  | 1  | JAW07002.1                                                                                                                 |                                                                                                                                                                                                                         |
| AEIDFSGIPEDIK(sub E)                                     | 21,85 | 1642,845 | 15 | -3,7 | 822,4269 | 46,03 | 0 | 1 | 15826 | 150211-Fr_I_Helo-red-alk-tryp-001.raw | 2  | 2  | P84190.1                                                                                                                   |                                                                                                                                                                                                                         |
| EPAPEPAPE(+356.19)PAPEAAP E                              | 21,81 | 2053,967 | 17 | -1,5 | 1027,989 | 20,38 | 0 | 1 | 6803  | 150211-Fr_I_Helo-red-alk-tryp-001.raw | 11 | 11 | JAW07022.1:P86821.1:POC8W6.1                                                                                               | Biotin polyethyleneoxide amine<br>E9:Biotin polyethyleneoxide amine:0.00                                                                                                                                                |
| EPAPK(+14.96)PAPEPAPEPAPE PAPEA                          | 21,8  | 2203,032 | 22 | -3,4 | 1102,52  | 17,11 | 0 | 1 | 5562  | 150211-Fr_I_Helo-red-alk-tryp-001.raw | 2  | 2  | POC8W6.1                                                                                                                   | Alpha-amino adipic acid<br>K5:Alpha-amino adipic acid:1000.00                                                                                                                                                           |
| E(+104.03)IDFSGIPEDIK                                    | 21,79 | 1578,782 | 13 | 4,1  | 790,4014 | 38,9  | 0 | 1 | 13262 | 150211-Fr_I_Helo-red-alk-tryp-001.raw | 1  | 1  | JAW06987.1:JAW07038.1:JAW06992.1:P84190.1                                                                                  | Benzoyl<br>E1:Benzoyl:73.35                                                                                                                                                                                             |
| K(+114.04)EGYAMDHEGC(+57.02)K                            | 21,79 | 1537,629 | 12 | -1,8 | 769,8204 | 5,64  | 0 | 1 | 1401  | 150211-Fr_I_Helo-red-alk-tryp-001.raw | 5  | 5  | JAW07016.1:JAW06979.1:P68411.1:1913435A:P68410.1:AA B36322.1:AAW72453.1:Q5G888.1:COHJ M9.1:JAG85185.1:CE F39517.1:P60276.1 | Ubiquitin; Carbamidomethylation<br>K1:Ubiquitin:18.75;C11:Carbamidomethylation:1000.00                                                                                                                                  |
| KGSSGYC(+57.02)AW(+19.99)P AC(+57.02)YC(+57.02)YGLPDSV K | 21,73 | 2545,071 | 22 | 0,7  | 849,3649 | 37,08 | 0 | 1 | 12595 | 150211-Fr_I_Helo-red-alk-tryp-001.raw | 1  | 1  | AAC25688.1:O77463.1:AAC25689.1                                                                                             | Carbamidomethylation; Tryptophan oxidation to hydroxykynurenin<br>C7:Carbamidomethylation:1000.00;W9:Tryptophan oxidation to hydroxykynurenin:1000.00;C12:Carbamidomethylation:1000.00;C14:Carbamidomethylation:1000.00 |
| AEY(ins)T(sub I)DFSGIPEDIK                               | 21,72 | 1696,82  | 15 | 0    | 849,4171 | 47,12 | 0 | 1 | 16204 | 150211-Fr_I_Helo-red-alk-tryp-001.raw | 1  | 1  | P84190.1                                                                                                                   |                                                                                                                                                                                                                         |
| AQ(sub E)W(sub I)DFSGIPEDIK                              | 21,64 | 1617,804 | 14 | -3,9 | 809,9061 | 40,2  | 0 | 1 | 13731 | 150211-Fr_I_Helo-red-alk-tryp-001.raw | 1  | 1  | JAW06987.1:JAW07038.1:JAW06992.1:P84190.1                                                                                  |                                                                                                                                                                                                                         |
| PEPAPEPAPEAAPEPVAAA                                      | 21,6  | 1880,916 | 20 | -2   | 941,4632 | 37,68 | 0 | 1 | 12816 | 150211-Fr_I_Helo-red-alk-tryp-001.raw | 1  | 1  | JAG85215.1                                                                                                                 |                                                                                                                                                                                                                         |
| VDTVAHETAHLIGAPHDEEGPEE (sub Q)TGISGSPGAK                | 21,59 | 3307,559 | 33 | 5,6  | 662,5228 | 15,72 | 0 | 1 | 5041  | 150211-Fr_I_Helo-red-alk-tryp-001.raw | 1  | 1  | AIJ02110.2                                                                                                                 |                                                                                                                                                                                                                         |
| PEDIKQIKETNAKPPAR(-42.02)FDPAAF                          | 21,58 | 2653,411 | 24 | -2,9 | 885,4752 | 48,84 | 0 | 1 | 16794 | 150211-Fr_I_Helo-red-alk-tryp-001.raw | 1  | 1  | JAW06987.1:JAW07038.1:JAW06992.1                                                                                           | Ornithine from Arginine<br>R18:Ornithine from Arginine:1000.00                                                                                                                                                          |
| T(sub V)DQ(sub E)ETFNEVYVC(+57.02)NYSPATI K              | 21,55 | 2378,074 | 20 | 3,2  | 1190,048 | 37,78 | 0 | 1 | 12852 | 150211-Fr_I_Helo-red-alk-tryp-001.raw | 1  | 1  | JAW07036.1:JAW06986.1                                                                                                      | Carbamidomethylation<br>C12:Carbamidomethylation:1000.00                                                                                                                                                                |
| APEPAPEAAPE(+14.02)PAAAA P                               | 21,55 | 1569,767 | 17 | -2,2 | 785,8892 | 33,96 | 0 | 1 | 11465 | 150211-Fr_I_Helo-red-alk-tryp-001.raw | 1  | 1  | POC8W6.1                                                                                                                   | Methylation(others)<br>E11:Methylation(others):16.51                                                                                                                                                                    |
| DVTMTGSK(+28.03)PFTTQ(+98)K                              | 21,52 | 1568,776 | 14 | -4   | 785,392  | 30,39 | 0 | 1 | 10200 | 150211-Fr_I_Helo-red-alk-tryp-001.raw | 2  | 2  | JAG85161.1                                                                                                                 | Dimethylation(KR); Deamidation (NQ)<br>K8:Dimethylation(KR):5.89;Q13:Deamidation (NQ):1000.00                                                                                                                           |

J Venom Anim Toxins incl Trop Dis, 2019

|                                                        |       |          |    |      |          |       |   |   |       |                                       |    |    |                                                    |                                                                                                                                                                                       |
|--------------------------------------------------------|-------|----------|----|------|----------|-------|---|---|-------|---------------------------------------|----|----|----------------------------------------------------|---------------------------------------------------------------------------------------------------------------------------------------------------------------------------------------|
| WWGN(sub G)EPIWVTAR                                    | 21,5  | 1513,747 | 12 | -1,6 | 757,8793 | 42,62 | 0 | 1 | 14608 | 150211-Fr_I_Helo-red-alk-tryp-001.raw | 1  | 1  | XP_023242894.1                                     |                                                                                                                                                                                       |
| AEIDFSGIPE(+21.97)DIK                                  | 21,47 | 1567,762 | 14 | -4,5 | 784,8847 | 93,47 | 0 | 1 | 31160 | 150211-Fr_I_Helo-red-alk-tryp-001.raw | 1  | 1  | JAW06987.1:JAW07038.1:JAW06992.1:P84190.1          | Replacement of 2 protons by magnesium<br>E10:Replacement of 2 protons by magnesium:0.00                                                                                               |
| LAPEPAPEP                                              | 21,43 | 919,465  | 9  | -0,2 | 460,7397 | 30,61 | 0 | 1 | 10276 | 150211-Fr_I_Helo-red-alk-tryp-001.raw | 1  | 1  | JAW07022.1:P86821.1                                |                                                                                                                                                                                       |
| KQ(sub V)NEPSFIGDSE(sub A)ILGHQQVLDPVDLVK              | 21,36 | 3004,551 | 27 | -2,9 | 752,1427 | 43,69 | 0 | 1 | 14994 | 150211-Fr_I_Helo-red-alk-tryp-001.raw | 3  | 3  | JAG85213.1                                         |                                                                                                                                                                                       |
| IMPV(sub I)AVADS(sub Q)GYLV(sub I)AK                   | 21,35 | 1645,911 | 16 | 1,2  | 549,645  | 38,09 | 0 | 1 | 12970 | 150211-Fr_I_Helo-red-alk-tryp-001.raw | 2  | 2  | XP_023242894.1                                     |                                                                                                                                                                                       |
| APEPAPEAAPEAAPEAAA                                     | 21,27 | 1755,831 | 19 | -1,2 | 586,2837 | 32,81 | 0 | 1 | 11048 | 150211-Fr_I_Helo-red-alk-tryp-001.raw | 1  | 1  | JAW07022.1:P86821.1                                |                                                                                                                                                                                       |
| A(sub E)V(sub I)DFSGIPEDIK                             | 21,25 | 1402,734 | 13 | 1,1  | 702,3752 | 39,13 | 0 | 1 | 13343 | 150211-Fr_I_Helo-red-alk-tryp-001.raw | 10 | 10 | JAW06987.1:JAW07038.1:JAW06992.1:P84190.1          |                                                                                                                                                                                       |
| AEIDFSGIPEDIK(+162.08)EI                               | 21,21 | 1950     | 16 | -1,1 | 976,0063 | 49,89 | 0 | 1 | 17154 | 150211-Fr_I_Helo-red-alk-tryp-001.raw | 1  | 1  | P84190.1                                           | O-Pinacolylmethylphosphorylation<br>K14:O-Pinacolylmethylphosphorylation:24.34                                                                                                        |
| ADVDFGTIAD(+37.96)S                                    | 21,17 | 1147,444 | 11 | -3   | 574,7273 | 33,17 | 0 | 1 | 11175 | 150211-Fr_I_Helo-red-alk-tryp-001.raw | 1  | 1  | JAW07002.1:P86824.1                                | Replacement of proton by potassium<br>D10:Replacement of proton by potassium:7.65                                                                                                     |
| AEIDFSGIPEDIK(+42.05)QIK                               | 21,04 | 1957,077 | 17 | 0    | 653,3663 | 53,84 | 0 | 1 | 18458 | 150211-Fr_I_Helo-red-alk-tryp-001.raw | 1  | 1  |                                                    | Trimethylation<br>K14:Trimethylation:6.63                                                                                                                                             |
| EALAPEPAK(+164.06)PAPEPAPEPA                           | 20,98 | 2142,065 | 20 | -4,5 | 1072,035 | 18,75 | 0 | 1 | 6186  | 150211-Fr_I_Helo-red-alk-tryp-001.raw | 1  | 1  | P0C8W6.1                                           | O-Diisopropylphosphorylation<br>K10:O-Diisopropylphosphorylation:21.89                                                                                                                |
| TEPSFIKDNLIPGPPAAFPDVLISAM(+15.99)SK(+42.02)           | 20,95 | 3127,59  | 29 | 0,9  | 626,5258 | 50,74 | 0 | 1 | 17438 | 150211-Fr_I_Helo-red-alk-tryp-001.raw | 1  | 1  | AIJ02109.2:P86392.3:V9Z9A3.1:AHE40589.1:AHE40588.1 | Oxidation (M); Guanidination<br>M27:Oxidation (M):1000.00;K29:Guanidination:6.58                                                                                                      |
| GSSGYC(+57.02)AWPAC(+57.02)YC(+57.02)YGLPDSVP(-27.99)  | 20,86 | 2337,949 | 21 | 0,3  | 1169,982 | 43,97 | 0 | 1 | 15092 | 150211-Fr_I_Helo-red-alk-tryp-001.raw | 1  | 1  |                                                    | Carbamidomethylation; Pyrrolidone from Proline<br>C6:Carbamidomethylation:1000.00;C11:Carbamidomethylation:1000.00;C13:Carbamidomethylation:1000.00;P21:Pyrrolidone from Proline:0.00 |
| KTQFGC(+57.02)PAYEGY(+44.99)C(+57.02)NNHC(+57.02)QDIER | 20,83 | 2791,117 | 22 | 2,9  | 931,3823 | 31,53 | 0 | 1 | 10592 | 150211-Fr_I_Helo-red-alk-tryp-001.raw | 1  | 1  | Q5G8A6.1:JAG85216.1:AAW72464.1:AAW72465.1          | Carbamidomethylation; Oxidation to nitro<br>C6:Carbamidomethylation:1000.00;Y12:Oxidation to nitro:28.96;C13:Carbamidomethylation:1000.00;C17:Carbamidomethylation:1000.00            |
| AEIDFSGIPEDIKQIK(+54.01)ETNA                           | 20,78 | 2384,211 | 21 | 3,5  | 1193,117 | 39,68 | 0 | 1 | 13543 | 150211-Fr_I_Helo-red-alk-tryp-001.raw | 1  | 1  | JAW06987.1:JAW07038.1:JAW06992.1                   | MDA adduct +54<br>K17:MDA adduct +54:16.66                                                                                                                                            |
| WWN(sub G)GEPIWVTAR                                    | 20,73 | 1513,747 | 12 | -1,3 | 757,8796 | 43,58 | 0 | 1 | 14954 | 150211-Fr_I_Helo-red-alk-tryp-001.raw | 4  | 4  | XP_023242894.1                                     |                                                                                                                                                                                       |
| EALAPE(+17.03)PAPEP                                    | 20,72 | 1136,571 | 11 | 0,6  | 569,2933 | 31,19 | 0 | 1 | 10475 | 150211-Fr_I_Helo-red-alk-tryp-001.raw | 1  | 1  | JAW07022.1:P86821.1                                | Replacement of proton with ammonium ion<br>E6:Replacement of proton with ammonium ion:0.00                                                                                            |
| E(sub A)EIY(sub D)FSGIPEDIK                            | 20,54 | 1651,835 | 14 | 1,2  | 826,9255 | 46,23 | 0 | 1 | 15895 | 150211-Fr_I_Helo-red-alk-tryp-001.raw | 2  | 2  | JAW06987.1:JAW07038.1:JAW06992.1:P84190.1          |                                                                                                                                                                                       |
| R(-42.02)AEIDFSGIPEDIK                                 | 20,53 | 1659,872 | 15 | 3,4  | 830,946  | 49,47 | 0 | 1 | 17011 | 150211-Fr_I_Helo-red-alk-tryp-001.raw | 1  | 1  | JAW06987.1:JAW07038.1:JAW06992.1                   | Ornithine from Arginine<br>R1:Ornithine from Arginine:1000.00                                                                                                                         |



J Venom Anim Toxins incl Trop Dis, 2019

|                                                              |       |          |    |      |          |       |          |   |       |                                       |    |    |                                             |                                                                                  |                                                                                                      |
|--------------------------------------------------------------|-------|----------|----|------|----------|-------|----------|---|-------|---------------------------------------|----|----|---------------------------------------------|----------------------------------------------------------------------------------|------------------------------------------------------------------------------------------------------|
| <b>APEPAPEAAPEAAPEAAAP(+13.98)ERR</b>                        | 20,51 | 2379,145 | 24 | -0,6 | 1190,579 | 40,44 | 0        | 1 | 13818 | 150211-Fr_I_Helo-red-alk-tryp-001.raw | 1  | 1  | JAW07022.1                                  | Proline oxidation to pyroglutamic acid                                           | P21:Proline oxidation to pyroglutamic acid:9.30                                                      |
| <b>DC(+57.02)PES(+58.03)DGYIM GSGNNK</b>                     | 20,4  | 1800,717 | 16 | -3,4 | 901,3627 | 5,81  | 0        | 1 | 1462  | 150211-Fr_I_Helo-red-alk-tryp-001.raw | 1  | 1  | AIJ02110.2                                  | Carbamidomethylation; 2 3-dihydro-2 2-dimethyl-7-benzofuranol N-methyl carbamate | C2:Carbamidomethylation:100 0.00;S5:2 3-dihydro-2 2-dimethyl-7-benzofuranol N-methyl carbamate:15.08 |
| <b>Y(sub F)V(sub I)NGGTDNSGIIITLLPGS(sub T)DS(sub P)SVTK</b> | 20,37 | 2507,275 | 25 | 2,8  | 1254,648 | 48,35 | 0        | 1 | 16626 | 150211-Fr_I_Helo-red-alk-tryp-001.raw | 1  | 1  | XP_023239442.1                              |                                                                                  |                                                                                                      |
| <b>SGAYFWP(+29.04)ASDIPIK</b>                                | 20,28 | 1579,816 | 14 | -3,8 | 790,9123 | 45,62 | 0        | 1 | 15681 | 150211-Fr_I_Helo-red-alk-tryp-001.raw | 1  | 1  | XP_023242894.1                              | Dimethylation of proline residue                                                 | P7:Dimethylation of proline residue:38.32                                                            |
| <b>S(+58.03)C(+57.02)PYDDGYIM GSTIEPNMLK</b>                 | 20,25 | 2348,025 | 20 | -1,7 | 783,6809 | 34,14 | 0        | 1 | 11529 | 150211-Fr_I_Helo-red-alk-tryp-001.raw | 1  | 1  | JAG85190.1                                  | 2 3-dihydro-2 2-dimethyl-7-benzofuranol N-methyl carbamate; Carbamidomethylation | S1:2 3-dihydro-2 2-dimethyl-7-benzofuranol N-methyl carbamate:5.16;C2:Carbamido methylation:1000.00  |
| <b>EPAPEPAPEAPE(+17.03)AAPE AAPEP</b>                        | 20,21 | 2180,027 | 22 | 2,4  | 727,6847 | 34,38 | 0        | 1 | 11614 | 150211-Fr_I_Helo-red-alk-tryp-001.raw | 1  | 1  | JAW07022.1:P86821 .1                        | Replacement of proton with ammonium ion                                          | E13:Replacement of proton with ammonium ion:0.00                                                     |
| <b>EPAPEPAPEAAPEP(-27.99)AAAAPEAAPE</b>                      | 20,19 | 2251,064 | 24 | 0,3  | 751,3622 | 37,03 | 0        | 1 | 12579 | 150211-Fr_I_Helo-red-alk-tryp-001.raw | 4  | 4  | POC8W6.1                                    | Pyrrolidone from Proline                                                         | P14:Pyrrolidone from Proline:0.00                                                                    |
| <b>EALAPE(+17.03)PAPEPAP</b>                                 | 20,16 | 1304,661 | 13 | 0,1  | 653,3379 | 19,38 | 2,30E+08 | 1 | 6427  | 150211-Fr_I_Helo-red-alk-tryp-001.raw | 11 | 11 | JAW07022.1:P86821 .1                        | Replacement of proton with ammonium ion                                          | E6:Replacement of proton with ammonium ion:4.75                                                      |
| <b>AEIDFSGIPE(+17.03)D</b>                                   | 19,97 | 1208,556 | 11 | 0,2  | 605,2854 | 33,4  | 0        | 1 | 11257 | 150211-Fr_I_Helo-red-alk-tryp-001.raw | 5  | 5  | JAW06987.1:JAW07 038.1:JAW06992.1:P 84190.1 | Replacement of proton with ammonium ion                                          | E10:Replacement of proton with ammonium ion:0.00                                                     |
| <b>Q(sub A)EQ(sub I)DFSGIPEDIK</b>                           | 19,96 | 1617,789 | 14 | 1,9  | 809,9031 | 41,22 | 0        | 1 | 14104 | 150211-Fr_I_Helo-red-alk-tryp-001.raw | 1  | 1  | JAW06987.1:JAW07038.1:JAW06992.1:P84190.1   |                                                                                  |                                                                                                      |
| <b>DQ(sub A)PPLN(sub D)LPQ(sub D)GVGFK</b>                   | 19,89 | 1508,799 | 14 | -0,1 | 755,4066 | 36,61 | 0        | 1 | 12419 | 150211-Fr_I_Helo-red-alk-tryp-001.raw | 2  | 2  | XP_023239442.1                              |                                                                                  |                                                                                                      |
| <b>AEIDFSGIPEDIKQIKETNAKPPA R(+39.99)FDP</b>                 | 19,89 | 3278,682 | 29 | -4   | 1093,897 | 41,82 | 0        | 1 | 14320 | 150211-Fr_I_Helo-red-alk-tryp-001.raw | 1  | 1  | JAW06987.1:JAW07 038.1:JAW06992.1           | Glyoxal-derived hydroimiadazolone                                                | R26:Glyoxal-derived hydroimiadazolone:1000.00                                                        |
| <b>AEID(+43.04)FSGIPEDIK</b>                                 | 19,81 | 1588,835 | 14 | 4,4  | 795,4282 | 50,54 | 0        | 1 | 17373 | 150211-Fr_I_Helo-red-alk-tryp-001.raw | 1  | 1  | JAW06987.1:JAW07 038.1:JAW06992.1:P 84190.1 | Carboxyl modification with ethanolamine                                          | D4:Carboxyl modification with ethanolamine:0.00                                                      |
| <b>LLGTEPIIRI</b>                                            | 19,79 | 1123,696 | 10 | -0,1 | 562,8554 | 33,79 | 0        | 1 | 11400 | 150211-Fr_I_Helo-red-alk-tryp-001.raw | 1  | 1  | AIJ02118.2                                  |                                                                                  |                                                                                                      |
| <b>AEIDFSGIPEDIK(+27.99)QI</b>                               | 19,77 | 1814,93  | 16 | 2,1  | 908,4742 | 52,47 | 0        | 1 | 18011 | 150211-Fr_I_Helo-red-alk-tryp-001.raw | 1  | 1  | JAW06987.1:JAW07 038.1:JAW06992.1           | Formylation                                                                      | K14:Formylation:21.35                                                                                |
| <b>P(+71.04)APEPAPEAAPEAAPEP AAAAPERR</b>                    | 19,7  | 2533,256 | 25 | -4,7 | 1267,629 | 36,8  | 0        | 1 | 12492 | 150211-Fr_I_Helo-red-alk-tryp-001.raw | 1  | 1  | JAW07022.1                                  | Propionamide (K X@N-term)                                                        | P1:Propionamide (K X@N-term):1000.00                                                                 |
| <b>W(sub A)Q(sub E)F(sub I)DFSGIPEDIK</b>                    | 19,68 | 1693,835 | 14 | -3,8 | 847,9216 | 44,89 | 0        | 1 | 15421 | 150211-Fr_I_Helo-red-alk-tryp-001.raw | 4  | 4  | JAW06987.1:JAW07038.1:JAW06992.1:P84190.1   |                                                                                  |                                                                                                      |
| <b>N(sub V)SESDKQTLTKT(sub V)HNELR</b>                       | 19,64 | 2012,029 | 17 | 3    | 671,6855 | 6,85  | 0        | 1 | 1832  | 150211-Fr_I_Helo-red-alk-tryp-001.raw | 2  | 2  |                                             |                                                                                  |                                                                                                      |
| <b>EN(sub I)DFSGIPEDIK</b>                                   | 19,62 | 1475,714 | 13 | 3,2  | 738,8668 | 47,22 | 0        | 1 | 16241 | 150211-Fr_I_Helo-red-alk-tryp-001.raw | 1  | 1  | JAW06987.1:JAW07038.1:JAW06992.1:P84190.1   |                                                                                  |                                                                                                      |
| <b>Y(sub S)DVTGGFPVNSNNCIYPC(+57.0</b>                       | 19,59 | 3965,617 | 33 | 2,5  | 1322,883 | 45,28 | 0        | 1 | 15559 | 150211-Fr_I_Helo-red-alk-tryp-001.raw | 1  | 1  | JAW07006.1                                  | Carbamidomethylation                                                             | C18:Carbamidomethylation:10 00.00;C27:Carbamidomethylat                                              |

J Venom Anim Toxins incl Trop Dis, 2019

|                                                                              |       |          |    |      |          |       |          |   |       |                                       |    |    |                                                    |                                                                                  |                                                                                                       |  |  |                                              |
|------------------------------------------------------------------------------|-------|----------|----|------|----------|-------|----------|---|-------|---------------------------------------|----|----|----------------------------------------------------|----------------------------------------------------------------------------------|-------------------------------------------------------------------------------------------------------|--|--|----------------------------------------------|
| <b>2)YSTQDEIQC(+57.02)EEFC(+57.02)EK</b>                                     |       |          |    |      |          |       |          |   |       |                                       |    |    |                                                    |                                                                                  |                                                                                                       |  |  | ion:1000.00;C31:Carbamidomethylation:1000.00 |
| <b>ESDPIHVQLLK</b>                                                           | 19,57 | 1277,698 | 11 | -1,9 | 639,855  | 40,72 | 0        | 1 | 13919 | 150211-Fr_I_Helo-red-alk-tryp-001.raw | 2  | 2  |                                                    |                                                                                  |                                                                                                       |  |  |                                              |
| <b>EPAPK(+154.10)PAPEPAPEPAP<br/>EPAPEAAPEAAAAPE</b>                         | 19,55 | 3246,597 | 32 | -1   | 1083,205 | 48,28 | 0        | 1 | 16605 | 150211-Fr_I_Helo-red-alk-tryp-001.raw | 1  | 1  | P0C8W6.1                                           | 4-Oxononenal (ONE)                                                               | K5:4-Oxononenal (ONE):1000.00                                                                         |  |  |                                              |
| <b>AIITVVDNGIMIGC(+57.02)GIFD<br/>VAS(+58.03)PSVK</b>                        | 19,54 | 2633,368 | 25 | -3,1 | 659,3473 | 49,13 | 0        | 1 | 16896 | 150211-Fr_I_Helo-red-alk-tryp-001.raw | 1  | 1  | JAW07019.1:JAW06978.1                              | Carbamidomethylation; 2 3-dihydro-2 2-dimethyl-7-benzofuranol N-methyl carbamate | C14:Carbamidomethylation:1000.00;S21:2 3-dihydro-2 2-dimethyl-7-benzofuranol N-methyl carbamate:14.04 |  |  |                                              |
| <b>SN(sub L)FVGEDVFN(sub I)ELIAK</b>                                         | 19,53 | 1827,904 | 16 | 3,7  | 914,9628 | 50,79 | 0        | 1 | 17454 | 150211-Fr_I_Helo-red-alk-tryp-001.raw | 1  | 1  | JAW06984.1                                         |                                                                                  |                                                                                                       |  |  |                                              |
| <b>TEPSFIKDNLIPGPPAAFDPDVLIS<br/>(+58.03)AM</b>                              | 19,46 | 2912,476 | 27 | -1,5 | 971,8311 | 53,14 | 0        | 1 | 18232 | 150211-Fr_I_Helo-red-alk-tryp-001.raw | 1  | 1  | AIJ02109.2:P86392.3:V9Z9A3.1:AHE40589.1:AHE40588.1 | 2 3-dihydro-2 2-dimethyl-7-benzofuranol N-methyl carbamate                       | S25:2 3-dihydro-2 2-dimethyl-7-benzofuranol N-methyl carbamate:14.35                                  |  |  |                                              |
| <b>EALAPE(+17.03)PAPEPAPEPAP<br/>EAAP</b>                                    | 19,46 | 2067,016 | 21 | -0,5 | 1034,515 | 33,83 | 4,99E+08 | 1 | 11415 | 150211-Fr_I_Helo-red-alk-tryp-001.raw | 1  | 1  | JAW07022.1:P86821.1                                | Replacement of proton with ammonium ion                                          | E6:Replacement of proton with ammonium ion:0.00                                                       |  |  |                                              |
| <b>SDVTGGFPVNF(sub S)NNCIYPC(+57.02)YSTQDEIQC<br/>(+57.02)EEFC(+57.02)EK</b> | 19,42 | 3949,622 | 33 | -3   | 988,4097 | 44,98 | 0        | 1 | 15453 | 150211-Fr_I_Helo-red-alk-tryp-001.raw | 1  | 1  | JAW07006.1                                         | Carbamidomethylation                                                             | C18:Carbamidomethylation:1000.00;C27:Carbamidomethylation:1000.00;C31:Carbamidomethylation:1000.00    |  |  |                                              |
| <b>ADT(sub V)N(sub D)FTGIADSIKK</b>                                          | 19,38 | 1592,841 | 15 | 5,2  | 531,957  | 36,72 | 0        | 1 | 12463 | 150211-Fr_I_Helo-red-alk-tryp-001.raw | 1  | 1  | JAW07002.1                                         |                                                                                  |                                                                                                       |  |  |                                              |
| <b>ES(+58.03)LIPGEEVDFGHVVG<br/>NL</b>                                       | 19,34 | 2115,04  | 19 | 4,2  | 1058,532 | 54,96 | 0        | 1 | 18823 | 150211-Fr_I_Helo-red-alk-tryp-001.raw | 1  | 1  | AIJ02112.2                                         | 2 3-dihydro-2 2-dimethyl-7-benzofuranol N-methyl carbamate                       | S2:2 3-dihydro-2 2-dimethyl-7-benzofuranol N-methyl carbamate:1000.00                                 |  |  |                                              |
| <b>EIKET(+79.96)NAKPPA</b>                                                   | 19,33 | 1276,597 | 11 | -2,9 | 639,3039 | 9,32  | 0        | 1 | 2735  | 150211-Fr_I_Helo-red-alk-tryp-001.raw | 2  | 2  | P84190.1                                           | Sulfation                                                                        | T5:Sulfation:1000.00                                                                                  |  |  |                                              |
| <b>T(sub V)TQ(sub E)SDKQTILETHNQLR<br/>AEIDFSGIPED(+17.03)</b>               | 19,29 | 2012,029 | 17 | 2,3  | 671,6851 | 10,1  | 0        | 1 | 3016  | 150211-Fr_I_Helo-red-alk-tryp-001.raw | 1  | 1  | JAW07031.1:JAW06995.1                              |                                                                                  |                                                                                                       |  |  |                                              |
| <b>AEIDFSGIPE</b>                                                            | 19,23 | 1208,556 | 11 | -0,1 | 605,2852 | 31,64 | 0        | 1 | 10631 | 150211-Fr_I_Helo-red-alk-tryp-001.raw | 2  | 2  | JAW06987.1:JAW07038.1:JAW06992.1:P84190.1          | Replacement of proton with ammonium ion                                          | D11:Replacement of proton with ammonium ion:0.00                                                      |  |  |                                              |
| <b>AEIDFSGIPE</b>                                                            | 19,14 | 1076,503 | 10 | -0,6 | 539,2582 | 32,09 | 0        | 1 | 10788 | 150211-Fr_I_Helo-red-alk-tryp-001.raw | 2  | 2  | JAW06987.1:JAW07038.1:JAW06992.1:P84190.1          |                                                                                  |                                                                                                       |  |  |                                              |
| <b>T(+380.15)SESEYAC(+57.02)PAI<br/>DK</b>                                   | 19,07 | 1849,782 | 13 | 3,2  | 925,901  | 6,6   | 0        | 1 | 1744  | 150211-Fr_I_Helo-red-alk-tryp-001.raw | 1  | 1  | Q0GY42.1:ABE98265.1:JAG85223.1                     | Nucleophilic addition to cytopiloyne+H2O; Carbamidomethylation                   | T1:Nucleophilic addition to cytopiloyne+H2O:0.00;C8:Carbamidomethylation:1000.00                      |  |  |                                              |
| <b>PGEEVDFGHVVGNLNVLNC(+57.02)KYK(+59.05)D</b>                               | 18,92 | 2808,367 | 24 | -3,6 | 937,1261 | 52,54 | 0        | 1 | 18034 | 150211-Fr_I_Helo-red-alk-tryp-001.raw | 2  | 2  | AIJ02112.2                                         | Carbamidomethylation; 5-hydroxy-N6 N6 N6-trimethyl                               | C20:Carbamidomethylation:1000.00;K23:5-hydroxy-N6 N6 N6-trimethyl:7.32                                |  |  |                                              |
| <b>PEAAPEAAPEAAAAPE(+43.04)</b>                                              | 18,9  | 1630,784 | 17 | -0,3 | 816,3989 | 13,98 | 0        | 1 | 4402  | 150211-Fr_I_Helo-red-alk-tryp-001.raw | 21 | 21 | JAW07022.1:P86821.1                                | Carboxyl modification with ethanolamine                                          | E17:Carboxyl modification with ethanolamine:26.08                                                     |  |  |                                              |
| <b>C(+43.01)NALLYRKVR</b>                                                    | 18,89 | 1277,703 | 10 | 0,8  | 639,8591 | 42,8  | 0        | 1 | 14675 | 150211-Fr_I_Helo-red-alk-tryp-001.raw | 1  | 1  | JAW07023.1                                         | Carbamylation                                                                    | C1:Carbamylation:44.44                                                                                |  |  |                                              |
| <b>EALAPE(+17.03)PAPEPAPEPAP</b>                                             | 18,87 | 1698,846 | 17 | 1    | 850,4313 | 14,94 | 0        | 1 | 4754  | 150211-Fr_I_Helo-red-alk-tryp-001.raw | 8  | 8  | JAW07022.1:P86821.1                                | Replacement of proton with ammonium ion                                          | E6:Replacement of proton with ammonium ion:0.00                                                       |  |  |                                              |

J Venom Anim Toxins incl Trop Dis, 2019

|                                                                |       |          |    |      |          |       |   |   |       |                                       |   |   |                                                                        |                                                                                         |                                                                                                                                             |
|----------------------------------------------------------------|-------|----------|----|------|----------|-------|---|---|-------|---------------------------------------|---|---|------------------------------------------------------------------------|-----------------------------------------------------------------------------------------|---------------------------------------------------------------------------------------------------------------------------------------------|
| <b>K(+42.02)EGYAM(+15.99)DHEGC(+57.02)K</b>                    | 18,78 | 1481,603 | 12 | 3,6  | 741,8113 | 7,46  | 0 | 1 | 2057  | 150211-Fr_I_Helo-red-alk-tryp-001.raw | 5 | 5 | P68411.1:1913435A:P68410.1:AAB36322.1:AAW72453.1:Q5G888.1:P60276.1     | Guanidination; Oxidation (M); Carbamidomethylation                                      | K1:Guanidination:26.12;M6:Oxidation (M):1000.00;C11:Carbamidomethylation:1000.00                                                            |
| <b>SLNHTMYSK</b>                                               | 18,67 | 1079,507 | 9  | 0    | 540,7607 | 18,24 | 0 | 1 | 5992  | 150211-Fr_I_Helo-red-alk-tryp-001.raw | 1 | 1 |                                                                        |                                                                                         |                                                                                                                                             |
| <b>AHEAAHLAVPHDGDGDFK(+127.06)VSDIPNSPGAK</b>                  | 18,58 | 3134,542 | 29 | -0,2 | 523,4308 | 36,01 | 0 | 1 | 12200 | 150211-Fr_I_Helo-red-alk-tryp-001.raw | 1 | 1 | AIJ02111.3                                                             | N-Succinimidyl-2-morpholine acetate                                                     | K18:N-Succinimidyl-2-morpholine acetate:2.27                                                                                                |
| <b>AEN(sub I)DFSGIPEH(sub D)IIK</b>                            | 18,58 | 1568,783 | 14 | -2,2 | 523,934  | 38,5  | 0 | 1 | 13120 | 150211-Fr_I_Helo-red-alk-tryp-001.raw | 1 | 1 | JAW06987.1:JAW07038.1:JAW06992.1                                       |                                                                                         |                                                                                                                                             |
| <b>APEPAAAAPER(+212.01)RRR</b>                                 | 18,49 | 1758,853 | 14 | -4,4 | 880,4297 | 15,14 | 0 | 1 | 4830  | 150211-Fr_I_Helo-red-alk-tryp-001.raw | 2 | 2 | JAW07022.1                                                             | phosphate-ribosylation                                                                  | R11:phosphate-ribosylation:0.00                                                                                                             |
| <b>EPAPEPAPEAAPE(+21.98)AAPE</b>                               | 18,44 | 1693,745 | 17 | -1,5 | 847,8783 | 35,08 | 0 | 1 | 11865 | 150211-Fr_I_Helo-red-alk-tryp-001.raw | 1 | 1 | JAW07022.1:P86821.1                                                    | Sodium adduct                                                                           | E13:Sodium adduct:0.00                                                                                                                      |
| <b>AEIDFSGIPE(+37.95)DII</b>                                   | 18,42 | 1455,645 | 13 | 1,2  | 486,2227 | 47,02 | 0 | 1 | 16170 | 150211-Fr_I_Helo-red-alk-tryp-001.raw | 1 | 1 | JAW06987.1:JAW07038.1:JAW06992.1:P84190.1                              | Replacement of 2 protons by calcium                                                     | E10:Replacement of 2 protons by calcium:11.06                                                                                               |
| <b>SNSW(sub A)LTNYVTVMFTGVQNLMDTLEL GIGVR</b>                  | 18,38 | 3357,674 | 30 | 0,1  | 840,4258 | 48,78 | 0 | 1 | 16774 | 150211-Fr_I_Helo-red-alk-tryp-001.raw | 1 | 1 | AIJ02109.2:P86392.3:V9Z9A3.1:AHE40589.1:AHE40588.1:AHE40596.1:V9ZAY0.1 |                                                                                         |                                                                                                                                             |
| <b>LAPEPAPEPAPEPAPE(+17.03)A</b>                               | 18,31 | 1698,846 | 17 | -0,9 | 850,4296 | 16,26 | 0 | 1 | 5242  | 150211-Fr_I_Helo-red-alk-tryp-001.raw | 3 | 3 | JAW07022.1:P86821.1                                                    | Replacement of proton with ammonium ion                                                 | E16:Replacement of proton with ammonium ion:0.00                                                                                            |
| <b>PAPEAAPEAAPEPAAAPE(+6.01)R</b>                              | 18,25 | 1917,941 | 20 | -2,7 | 959,975  | 13,7  | 0 | 1 | 4302  | 150211-Fr_I_Helo-red-alk-tryp-001.raw | 1 | 1 | JAW07022.1                                                             | Replacement of proton by lithium                                                        | E19:Replacement of proton by lithium:7.21                                                                                                   |
| <b>APEPAPE(+21.98)AAPEA</b>                                    | 18,22 | 1170,517 | 12 | -2,8 | 586,264  | 30,18 | 0 | 1 | 10132 | 150211-Fr_I_Helo-red-alk-tryp-001.raw | 1 | 1 | JAW07022.1:P86821.1                                                    | Sodium adduct                                                                           | E7:Sodium adduct:19.56                                                                                                                      |
| <b>EPAPEAAPEPVAAPAAAPER(-.98)</b>                              | 18,19 | 1770,89  | 18 | -2   | 886,4505 | 23,43 | 0 | 1 | 7914  | 150211-Fr_I_Helo-red-alk-tryp-001.raw | 9 | 9 | JAG85215.1                                                             | Amidation                                                                               | R18:Amidation:1000.00                                                                                                                       |
| <b>I(+41.03)RPSGFC(+57.02)DGYC(+57.02)K</b>                    | 18,15 | 1499,665 | 12 | -0,9 | 500,8951 | 30,66 | 0 | 1 | 10294 | 150211-Fr_I_Helo-red-alk-tryp-001.raw | 1 | 1 | COHJM9.1:JAG85185.1:CEF39517.1:P60276.1                                | Amidation of lysines or N-terminal amines with methyl acetimidate; Carbamidomethylation | I1:Amidation of lysines or N-terminal amines with methyl acetimidate:44.44;C7:Carbamidomethylation:1000.00;C11:Carbamidomethylation:1000.00 |
| <b>KTQFGC(+57.02)PAYEGY(+44.99)C(+57.02)NNHC(+57.02)QDIERK</b> | 18,03 | 2919,212 | 23 | 1,7  | 730,8116 | 31,09 | 0 | 1 | 10443 | 150211-Fr_I_Helo-red-alk-tryp-001.raw | 2 | 2 | Q5G8A6.1:JAG85216.1:AAW72464.1:AAW72465.1                              | Carbamidomethylation; Oxidation to nitro                                                | C6:Carbamidomethylation:1000.00;Y12:Oxidation to nitro:9.42;C13:Carbamidomethylation:1000.00;C17:Carbamidomethylation:1000.00               |
| <b>EALAPEPAPK(+362.14)PAPEPAPEPAPEPA</b>                       | 18    | 2734,326 | 24 | -0,2 | 912,4492 | 37,98 | 0 | 1 | 12929 | 150211-Fr_I_Helo-red-alk-tryp-001.raw | 1 | 1 | POC8W6.1                                                               | Nucleophilic addition to cytopiloyne                                                    | K10:Nucleophilic addition to cytopiloyne:0.00                                                                                               |
| <b>N(sub S)VH(sub Y)DIEANPILLK</b>                             | 17,98 | 1474,814 | 13 | -3,2 | 738,4121 | 36,36 | 0 | 1 | 12327 | 150211-Fr_I_Helo-red-alk-tryp-001.raw | 1 | 1 | AIJ02118.2                                                             |                                                                                         |                                                                                                                                             |
| <b>NPC(+57.02)IIIDH(sub Y)LC(+57.02)VTETFA(sub T)ER</b>        | 17,96 | 2288,093 | 19 | -2,5 | 763,7031 | 51,49 | 0 | 1 | 17689 | 150211-Fr_I_Helo-red-alk-tryp-001.raw | 1 | 1 | JAG85213.1                                                             | Carbamidomethylation                                                                    | C3:Carbamidomethylation:1000.00;C10:Carbamidomethylation:1000.00                                                                            |
| <b>APEAAPEAAPEPAAAAPER(-42.02)</b>                             | 17,96 | 1772,858 | 19 | -1,1 | 887,4353 | 14,44 | 0 | 1 | 4572  | 150211-Fr_I_Helo-red-alk-tryp-001.raw | 2 | 2 | JAW07022.1                                                             | Ornithine from Arginine                                                                 | R19:Ornithine from Arginine:1000.00                                                                                                         |

J Venom Anim Toxins incl Trop Dis, 2019

|                                                                  |       |          |    |      |          |       |   |   |       |                                       |   |   |                                           |                                                            |                                                                                                                              |
|------------------------------------------------------------------|-------|----------|----|------|----------|-------|---|---|-------|---------------------------------------|---|---|-------------------------------------------|------------------------------------------------------------|------------------------------------------------------------------------------------------------------------------------------|
| <b>TQFGC(+57.02)PAYEGY(+44.99)C(+57.02)NNHC(+57.02)QDIERK</b>    | 17,91 | 2791,117 | 22 | 1,2  | 931,3808 | 14,42 | 0 | 1 | 4565  | 150211-Fr_I_Helo-red-alk-tryp-001.raw | 1 | 1 | Q5G8A6.1:JAG85216.1:AAW72464.1:AAW72465.1 | Carbamidomethylation; Oxidation to nitro                   | C5:Carbamidomethylation:100.00;Y11:Oxidation to nitro:4.05;C12:Carbamidomethylation:1000.00;C16:Carbamidomethylation:1000.00 |
| <b>G(sub D)FSGIPEDIK</b>                                         | 17,9  | 1174,623 | 11 | -0,7 | 588,3185 | 34,89 | 0 | 1 | 11799 | 150211-Fr_I_Helo-red-alk-tryp-001.raw | 2 | 2 | JAW06987.1:JAW07038.1:JAW06992.1:P84190.1 |                                                            |                                                                                                                              |
| <b>AN(sub D)T(sub V)DFTGIADSIKR(sub K)ADVDFGIADS(+162.05)IIK</b> | 17,9  | 1620,847 | 15 | 4,5  | 541,2921 | 36,71 | 0 | 1 | 12459 | 150211-Fr_I_Helo-red-alk-tryp-001.raw | 1 | 1 | JAW07002.1                                |                                                            |                                                                                                                              |
| <b>AEIDFSGIPEDIK(+117.02)EIK</b>                                 | 17,88 | 1625,804 | 14 | -1,4 | 813,9078 | 46,8  | 0 | 1 | 16091 | 150211-Fr_I_Helo-red-alk-tryp-001.raw | 4 | 4 | JAW07002.1:P86824.1                       | Hexose (NSY)                                               | S11:Hexose (NSY):1000.00                                                                                                     |
| <b>IDFSGIPEDIK(+117.02)EIK</b>                                   | 17,86 | 2033,039 | 17 | 4,7  | 1017,532 | 48,56 | 0 | 1 | 16697 | 150211-Fr_I_Helo-red-alk-tryp-001.raw | 1 | 1 | P84190.1                                  | N-Homocysteine thiolactone                                 | K14:N-Homocysteine thiolactone:7.77                                                                                          |
| <b>IDFSGIPEDIK</b>                                               | 17,82 | 1217,618 | 11 | -0,7 | 609,8158 | 45,87 | 0 | 1 | 15768 | 150211-Fr_I_Helo-red-alk-tryp-001.raw | 1 | 1 | JAW06987.1:JAW07038.1:JAW06992.1:P84190.1 |                                                            |                                                                                                                              |
| <b>D(sub K)ITCFLTAAGYC(+57.02)NTEC(+57.02)TLKK</b>               | 17,78 | 2308,054 | 20 | 5,2  | 770,3625 | 34,24 | 0 | 1 | 11564 | 150211-Fr_I_Helo-red-alk-tryp-001.raw | 1 | 1 | AAC25688.1:O77463.1:AAW72465.1            | Carbamidomethylation                                       | C12:Carbamidomethylation:1000.00;C16:Carbamidomethylation:1000.00                                                            |
| <b>LAPEPAPEPAPE(+17.03)PAPEA</b>                                 | 17,77 | 1698,846 | 17 | 0    | 850,4304 | 16,68 | 0 | 1 | 5398  | 150211-Fr_I_Helo-red-alk-tryp-001.raw | 7 | 7 | JAW07022.1:P86821.1                       | Replacement of proton with ammonium ion                    | E12:Replacement of proton with ammonium ion:16.65                                                                            |
| <b>AR(sub E)M(sub I)DFSGIPEDIK</b>                               | 17,72 | 1590,808 | 14 | 3,7  | 796,4139 | 47    | 0 | 1 | 16162 | 150211-Fr_I_Helo-red-alk-tryp-001.raw | 1 | 1 | JAW06987.1:JAW07038.1:JAW06992.1          |                                                            |                                                                                                                              |
| <b>KW(sub G)M(sub S)SGYCAWPAC(+57.02)YC(+57.02)YGLPDSVK</b>      | 17,64 | 2641,126 | 22 | 1    | 1321,572 | 37,71 | 0 | 1 | 12825 | 150211-Fr_I_Helo-red-alk-tryp-001.raw | 1 | 1 | AAC25688.1:O77463.1:AAW72465.1            | Carbamidomethylation                                       | C12:Carbamidomethylation:1000.00;C14:Carbamidomethylation:1000.00                                                            |
| <b>Q(sub A)EIDFSS(sub G)V(sub I)PEDIK</b>                        | 17,63 | 1618,809 | 14 | -2   | 810,4102 | 39,38 | 0 | 1 | 13435 | 150211-Fr_I_Helo-red-alk-tryp-001.raw | 1 | 1 | JAW06987.1:JAW07038.1:JAW06992.1          |                                                            |                                                                                                                              |
| <b>E(+108.00)NVVPENC(+57.02)PK</b>                               | 17,6  | 1292,547 | 10 | 1    | 647,2815 | 5,59  | 0 | 1 | 1385  | 150211-Fr_I_Helo-red-alk-tryp-001.raw | 2 | 2 | JAW07031.1:JAW06995.1                     | O-Ethylphosphorylation; Carbamidomethylation               | E1:O-Ethylphosphorylation:61.14;C8:Carbamidomethylation:1000.00                                                              |
| <b>FSC(+57.02)FIRPSGFC(+57.02)DGYC(+57.02)K(+42.02)</b>          | 17,59 | 2041,86  | 16 | 3,3  | 681,6294 | 33,1  | 0 | 1 | 11150 | 150211-Fr_I_Helo-red-alk-tryp-001.raw | 1 | 1 | C0HJM9.1:JAG85185.1:CEF39517.1:P60276.1   | Carbamidomethylation; Guanidination                        | C3:Carbamidomethylation:1000.00;C11:Carbamidomethylation:1000.00;C15:Carbamidomethylation:1000.00;K16:Guanidination:1000.00  |
| <b>DSWTE(sub Q)LYVC(+57.02)NYGPAGNLDDSELYK</b>                   | 17,57 | 2808,222 | 24 | 5,6  | 937,0866 | 47,11 | 0 | 1 | 16202 | 150211-Fr_I_Helo-red-alk-tryp-001.raw | 1 | 1 | JAW06991.1:JAW07032.1                     | Carbamidomethylation                                       | C9:Carbamidomethylation:1000.00                                                                                              |
| <b>FGNVAGETAAS(+58.03)EVNFHFSAPHLIFPEGMKETR</b>                  | 17,56 | 3644,76  | 33 | -1,4 | 608,4664 | 45,98 | 0 | 1 | 15806 | 150211-Fr_I_Helo-red-alk-tryp-001.raw | 1 | 1 | JAW07031.1:JAW06995.1                     | 2 3-dihydro-2 2-dimethyl-7-benzofuranol N-methyl carbamate | S12:2 3-dihydro-2 2-dimethyl-7-benzofuranol N-methyl carbamate:0.00                                                          |
| <b>NDYLLYCDFSDKDPK</b>                                           | 17,51 | 1834,808 | 15 | -0,7 | 612,6096 | 20,36 | 0 | 1 | 6797  | 150211-Fr_I_Helo-red-alk-tryp-001.raw | 2 | 2 | JAG85161.1                                |                                                            |                                                                                                                              |
| <b>TDQALTEYVTQ(+.98)MFTGVQ(+.98)NMYDTMNLKI</b>                   | 17,49 | 3398,561 | 29 | -3,4 | 1133,857 | 49,39 | 0 | 1 | 16984 | 150211-Fr_I_Helo-red-alk-tryp-001.raw | 1 | 1 | JAW07042.1                                | Deamidation (NQ)                                           | Q11:Deamidation (NQ):1.34;Q17:Deamidation (NQ):7.65                                                                          |

J Venom Anim Toxins incl Trop Dis, 2019

|                                                              |       |          |    |      |          |       |          |   |       |                                       |   |   |                                                                                                                            |                                                            |                                                                                                              |
|--------------------------------------------------------------|-------|----------|----|------|----------|-------|----------|---|-------|---------------------------------------|---|---|----------------------------------------------------------------------------------------------------------------------------|------------------------------------------------------------|--------------------------------------------------------------------------------------------------------------|
| <b>AEIDFSGIPEDIK(+58.01)QI</b>                               | 17,44 | 1844,941 | 16 | 1,3  | 923,4788 | 51,78 | 1,90E+08 | 1 | 17785 | 150211-Fr_I_Helo-red-alk-tryp-001.raw | 1 | 1 | JAW06987.1:JAW07038.1:JAW06992.1                                                                                           | Carboxymethyl (KW X@N-term)                                | K14:Carboxymethyl (KW X@N-term):32.13                                                                        |
| <b>EPAPEPAPEAAPEP</b>                                        | 17,4  | 1400,646 | 14 | 1    | 701,3309 | 31,57 | 0        | 1 | 10607 | 150211-Fr_I_Helo-red-alk-tryp-001.raw | 1 | 1 | POC8W6.1                                                                                                                   |                                                            |                                                                                                              |
| <b>SC(+57.02)PYDDGYIMGSTIEPNM(+15.99)LK(+42.02)</b>          | 17,36 | 2348,012 | 20 | 1,8  | 1175,016 | 20,57 | 0        | 1 | 6874  | 150211-Fr_I_Helo-red-alk-tryp-001.raw | 1 | 1 | JAG85190.1                                                                                                                 | Carbamidomethylation; Oxidation (M); Guanidination         | C2:Carbamidomethylation:1000.00;M18:Oxidation (M):3.68;K20:Guanidination:1000.00                             |
| <b>APEAAPEPAAAAPERRR(+282.05)R</b>                           | 17,35 | 2197,066 | 18 | -1,7 | 1099,539 | 34,09 | 0        | 1 | 11512 | 150211-Fr_I_Helo-red-alk-tryp-001.raw | 1 | 1 | JAW07022.1                                                                                                                 | Bis(hydroxyphenylglyoxal) arginine                         | R17:Bis(hydroxyphenylglyoxal) arginine:0.00                                                                  |
| <b>EPAPEPAPEPAPEAAPE(+17.03)AAPEP</b>                        | 17,32 | 2180,027 | 22 | 2,1  | 727,6845 | 34,16 | 0        | 1 | 11535 | 150211-Fr_I_Helo-red-alk-tryp-001.raw | 1 | 1 | JAW07022.1:P86821.1                                                                                                        | Replacement of proton with ammonium ion                    | E17:Replacement of proton with ammonium ion:6.65                                                             |
| <b>SGIPEDIKE(-.98)</b>                                       | 17,32 | 1098,592 | 10 | 0,9  | 550,3038 | 31,07 | 0        | 1 | 10434 | 150211-Fr_I_Helo-red-alk-tryp-001.raw | 1 | 1 | P84190.1                                                                                                                   | Amidation                                                  | E10:Amidation:1000.00                                                                                        |
| <b>APEAAPEPAA</b>                                            | 17,26 | 922,4396 | 10 | 0    | 462,2271 | 5,83  | 0        | 1 | 1469  | 150211-Fr_I_Helo-red-alk-tryp-001.raw | 2 | 2 | JAW07022.1:P86821.1:POC8W6.1                                                                                               |                                                            |                                                                                                              |
| <b>AEIDFS(+58.03)GIPEDIKQ</b>                                | 17,16 | 1731,881 | 15 | -2,4 | 866,9454 | 41,56 | 0        | 1 | 14227 | 150211-Fr_I_Helo-red-alk-tryp-001.raw | 2 | 2 | JAW06987.1:JAW07038.1:JAW06992.1                                                                                           | 2 3-dihydro-2 2-dimethyl-7-benzofuranol N-methyl carbamate | S6:2 3-dihydro-2 2-dimethyl-7-benzofuranol N-methyl carbamate:1000.00                                        |
| <b>P(+58.01)APEPAPEAAPEAAPEPAAAAPERRR</b>                    | 17,15 | 2676,325 | 26 | -2,8 | 893,1133 | 37,26 | 0        | 1 | 12661 | 150211-Fr_I_Helo-red-alk-tryp-001.raw | 1 | 1 | JAW07022.1                                                                                                                 | Carboxymethyl (KW X@N-term)                                | P1:Carboxymethyl (KW X@N-term):1000.00                                                                       |
| <b>EPQPSASEAFSK</b>                                          | 17,14 | 1276,594 | 12 | -0,7 | 639,3036 | 6,36  | 0        | 1 | 1658  | 150211-Fr_I_Helo-red-alk-tryp-001.raw | 4 | 4 |                                                                                                                            |                                                            |                                                                                                              |
| <b>D(-18.01)GEC(+57.02)HGFK</b>                              | 17,1  | 930,3654 | 8  | 1,2  | 466,1905 | 11,98 | 0        | 1 | 3688  | 150211-Fr_I_Helo-red-alk-tryp-001.raw | 2 | 2 | POC2F3.1:P69940.2:Q5G8A6.1:JAG85216.1:AAW72464.1:AAW72465.1                                                                | Dehydration; Carbamidomethylation                          | D1:Dehydration:1000.00;C4:Carbamidomethylation:1000.00                                                       |
| <b>K(+14.96)EGYIMDHEGC(+57.02)K</b>                          | 17,08 | 1480,596 | 12 | 2,5  | 741,3073 | 5,64  | 3,49E+06 | 1 | 1404  | 150211-Fr_I_Helo-red-alk-tryp-001.raw | 1 | 1 | AAB29128.1:P56612.1:AIA81145.1:CAA46982.1:P15226.2:PODMM8.1:1NPI:1B7D:AAB36321.1:AAB36318.1:P56611.1:JAG85191.1:JAG85210.1 | Alpha-amino adipic acid; Carbamidomethylation              | K1:Alpha-amino adipic acid:45.45;C11:Carbamidomethylation:1000.00                                            |
| <b>PAC(+57.02)YC(+57.02)YGLPDSVKIWTSE(+37.95)TNK</b>         | 17,07 | 2526,087 | 21 | -0,8 | 1264,05  | 37,16 | 0        | 1 | 12625 | 150211-Fr_I_Helo-red-alk-tryp-001.raw | 2 | 2 | AAC25688.1:O77463.1:AAAC25689.1                                                                                            | Carbamidomethylation; Replacement of 2 protons by calcium  | C3:Carbamidomethylation:1000.00;C5:Carbamidomethylation:1000.00;E18:Replacement of 2 protons by calcium:5.77 |
| <b>LVML(sub A)DETDYNER</b>                                   | 17,03 | 1496,682 | 12 | -0,5 | 749,3477 | 6,78  | 0        | 1 | 1809  | 150211-Fr_I_Helo-red-alk-tryp-001.raw | 2 | 2 | AIJ02111.3                                                                                                                 |                                                            |                                                                                                              |
| <b>KGSSGYC(+57.02)W(sub A)WPAC(+57.02)YC(+57.02)YGLPDSVK</b> | 16,99 | 2640,124 | 22 | -0,4 | 881,0481 | 37,54 | 0        | 1 | 12765 | 150211-Fr_I_Helo-red-alk-tryp-001.raw | 1 | 1 | AAC25688.1:O77463.1:AAAC25689.1                                                                                            | Carbamidomethylation                                       | C7:Carbamidomethylation:1000.00;C12:Carbamidomethylation:1000.00;C14:Carbamidomethylation:1000.00            |
| <b>APEPAPEAAPEA</b>                                          | 16,97 | 1148,535 | 12 | 0,3  | 575,2749 | 6,01  | 0        | 1 | 1532  | 150211-Fr_I_Helo-red-alk-tryp-001.raw | 9 | 9 | JAW07022.1:P86821.1                                                                                                        |                                                            |                                                                                                              |
| <b>EPAPEPAPEAAP(+29.04)EPAAAPE</b>                           | 16,95 | 1939,929 | 20 | -1,4 | 970,9703 | 35,63 | 0        | 1 | 12061 | 150211-Fr_I_Helo-red-alk-tryp-001.raw | 1 | 1 | POC8W6.1                                                                                                                   | Dimethylation of proline residue                           | P12:Dimethylation of proline residue:0.00                                                                    |

J Venom Anim Toxins incl Trop Dis, 2019

|                                                                                                                  |       |          |    |      |          |       |   |   |       |                                       |   |   |                                  |                                                            |                                                                                                                                                             |
|------------------------------------------------------------------------------------------------------------------|-------|----------|----|------|----------|-------|---|---|-------|---------------------------------------|---|---|----------------------------------|------------------------------------------------------------|-------------------------------------------------------------------------------------------------------------------------------------------------------------|
| ITC(+57.02)FLTAAGYC(+57.02)<br>NTE(+43.99)C(+57.02)TLK(+14.02)                                                   | 16,88 | 2179,959 | 18 | 2,7  | 727,6622 | 35,1  | 0 | 1 | 11871 | 150211-Fr_I_Helo-red-alk-tryp-001.raw | 1 | 1 | AAC25688.1:O77463.1:AAC25689.1   | Carbamidomethylation; Carboxylation (E); Methylation(KR)   | C3:Carbamidomethylation:1000.00;C11:Carbamidomethylation:1000.00;E14:Carboxylation (E):1000.00;C15:Carbamidomethylation:1000.00;K18:Methylation(KR):1000.00 |
| GTHAHWIC(+57.02)LVE(+21.98)HESSENTAAK                                                                            | 16,86 | 2408,119 | 21 | -2,7 | 1205,064 | 44,83 | 0 | 1 | 15401 | 150211-Fr_I_Helo-red-alk-tryp-001.raw | 1 | 1 | XP_023218922.1                   | Carbamidomethylation; Sodium adduct                        | C8:Carbamidomethylation:1000.00;E11:Sodium adduct:0.00                                                                                                      |
| N(sub L)LGV(sub I)QAFKIGTEPSFIK                                                                                  | 16,85 | 1848,015 | 17 | 2,7  | 925,017  | 46,71 | 0 | 1 | 16062 | 150211-Fr_I_Helo-red-alk-tryp-001.raw | 1 | 1 |                                  |                                                            |                                                                                                                                                             |
| IFWADSK                                                                                                          | 16,81 | 865,4333 | 7  | -4,7 | 433,7219 | 21,44 | 0 | 1 | 7196  | 150211-Fr_I_Helo-red-alk-tryp-001.raw | 2 | 2 |                                  |                                                            |                                                                                                                                                             |
| KGSSGYCE(sub A)WPAC(+57.02)YC(+57.02)YGLPDSVK                                                                    | 16,79 | 2526,065 | 22 | 4    | 843,0325 | 43,89 | 0 | 1 | 15065 | 150211-Fr_I_Helo-red-alk-tryp-001.raw | 1 | 1 | AAC25688.1:O77463.1:AAC25689.1   | Carbamidomethylation                                       | C12:Carbamidomethylation:1000.00;C14:Carbamidomethylation:1000.00                                                                                           |
| GF(sub S)DVTGGFPVNSNCCIYPCYSTQDEIQC(+57.02)EEFC(+57.02)EKC(+57.02)VQ(sub A)SDGFIMGDSIGENKER(+14.02)AEIDFSGIPEDIK | 16,77 | 3949,622 | 34 | -2,1 | 1317,545 | 45,43 | 0 | 1 | 15612 | 150211-Fr_I_Helo-red-alk-tryp-001.raw | 1 | 1 | JAW07006.1                       | Carbamidomethylation                                       | C28:Carbamidomethylation:1000.00;C32:Carbamidomethylation:1000.00                                                                                           |
| ER(+14.02)AEIDFSGIPEDIK                                                                                          | 16,75 | 1844,952 | 16 | 2,2  | 923,4852 | 50,81 | 0 | 1 | 17461 | 150211-Fr_I_Helo-red-alk-tryp-001.raw | 1 | 1 | JAW06987.1:JAW07038.1:JAW06992.1 | Methylation(KR)                                            | R2:Methylation(KR):26.51                                                                                                                                    |
| KEDHYNVM(+15.99)TK                                                                                               | 16,71 | 1279,587 | 10 | -1,3 | 640,7998 | 8,21  | 0 | 1 | 2329  | 150211-Fr_I_Helo-red-alk-tryp-001.raw | 6 | 6 |                                  | Oxidation (M)                                              | M8:Oxidation (M):1000.00                                                                                                                                    |
| TW(sub Q)FGC(+57.02)PAYEGYC(+57.02)NDHC(+57.02)NDIER                                                             | 16,69 | 2663,026 | 21 | 1    | 888,6836 | 15,13 | 0 | 1 | 4826  | 150211-Fr_I_Helo-red-alk-tryp-001.raw | 5 | 5 | POC2F3.1:P69940.2                | Carbamidomethylation                                       | C5:Carbamidomethylation:1000.00;C12:Carbamidomethylation:1000.00;C16:Carbamidomethylation:1000.00                                                           |
| TE(sub Q)FGC(+57.02)PAYEGYC(+57.02)NDHC(+57.02)NDIER                                                             | 16,68 | 2605,99  | 21 | 5,2  | 869,675  | 18,24 | 0 | 1 | 5991  | 150211-Fr_I_Helo-red-alk-tryp-001.raw | 4 | 4 | POC2F3.1:P69940.2                | Carbamidomethylation                                       | C5:Carbamidomethylation:1000.00;C12:Carbamidomethylation:1000.00;C16:Carbamidomethylation:1000.00                                                           |
| T(+75.98)VAYNTAGISLGSVC(+57.02)K                                                                                 | 16,61 | 1772,826 | 17 | -0,3 | 887,42   | 36,38 | 0 | 1 | 12333 | 150211-Fr_I_Helo-red-alk-tryp-001.raw | 1 | 1 | AIJ02110.2:JAG85213.1            | EDT; Carbamidomethylation                                  | T1:EDT:0.00;C16:Carbamidomethylation:1000.00                                                                                                                |
| TC(+57.02)FLTAAGYC(+57.02)NTEC(+57.02)TLK(+43.01)K                                                               | 16,6  | 2179,97  | 18 | -0,7 | 727,6634 | 34,92 | 0 | 1 | 11807 | 150211-Fr_I_Helo-red-alk-tryp-001.raw | 1 | 1 | AAC25688.1:O77463.1:AAC25689.1   | Carbamidomethylation; Carbamylation                        | C2:Carbamidomethylation:1000.00;C10:Carbamidomethylation:1000.00;C14:Carbamidomethylation:1000.00;K17:Carbamylation:0.00                                    |
| ETRPISSWHTIGILM(+15.99)RWNKELQISYVFK                                                                             | 16,57 | 3447,813 | 28 | 3,3  | 690,572  | 53,88 | 0 | 1 | 18472 | 150211-Fr_I_Helo-red-alk-tryp-001.raw | 1 | 1 | JAG85161.1                       | Oxidation (M)                                              | M15:Oxidation (M):1000.00                                                                                                                                   |
| ISFTYEINWKPSIHK                                                                                                  | 16,53 | 1811,946 | 15 | -2,2 | 906,9781 | 63,6  | 0 | 1 | 21612 | 150211-Fr_I_Helo-red-alk-tryp-001.raw | 1 | 1 |                                  |                                                            |                                                                                                                                                             |
| AEIDFS(+58.03)GIPEDIKEIK                                                                                         | 16,52 | 1974,044 | 17 | -2,7 | 988,0263 | 48,56 | 0 | 1 | 16698 | 150211-Fr_I_Helo-red-alk-tryp-001.raw | 1 | 1 | P84190.1                         | 2 3-dihydro-2 2-dimethyl-7-benzofuranol N-methyl carbamate | S6:2 3-dihydro-2 2-dimethyl-7-benzofuranol N-methyl carbamate:1000.00                                                                                       |
| PAPEAAPEAAPE(+43.99)PAAAP                                                                                        | 16,48 | 1670,779 | 18 | -0,5 | 836,3962 | 32,33 | 0 | 1 | 10872 | 150211-Fr_I_Helo-red-alk-tryp-001.raw | 1 | 1 | JAW07022.1:P86821.1              | Carboxylation (E)                                          | E12:Carboxylation (E):19.86                                                                                                                                 |

J Venom Anim Toxins incl Trop Dis, 2019

|                                                            |       |          |    |      |          |       |          |   |       |                                       |   |   |                                           |                                                                                  |                                                                                                                                 |
|------------------------------------------------------------|-------|----------|----|------|----------|-------|----------|---|-------|---------------------------------------|---|---|-------------------------------------------|----------------------------------------------------------------------------------|---------------------------------------------------------------------------------------------------------------------------------|
| <b>FIRPS(+380.15)GFC(+57.02)DGYC(+57.02)K</b>              | 16,35 | 1985,854 | 13 | -2,3 | 662,957  | 38,67 | 0        | 1 | 13180 | 150211-Fr_I_Helo-red-alk-tryp-001.raw | 1 | 1 | COHJM9.1:JAG85185.1:CEF39517.1:P60276.1   | Nucleophilic addition to cytopiloyn+H2O; Carbamidomethylation                    | S5:Nucleophilic addition to cytopiloyn+H2O:8.26;C8:Carb amidomethylation:1000.00;C12:Carbamidomethylation:1000.00               |
| <b>KVTCFLTAAGYC(+57.02)NTEC(+57.02)T(sub K)LQ</b>          | 16,34 | 2178,975 | 19 | -0,6 | 727,3318 | 36,64 | 4,00E+09 | 1 | 12429 | 150211-Fr_I_Helo-red-alk-tryp-001.raw | 1 | 1 | AAW72463.1:Q5G8A8.1                       | Carbamidomethylation                                                             | C12:Carbamidomethylation:1000.00;C16:Carbamidomethylat ion:1000.00                                                              |
| <b>ITC(+57.02)FLTAAGYC(+57.02)NTEC(+57.02)T(+59.02)LKK</b> | 16,31 | 2309,068 | 19 | 0,6  | 1155,542 | 18,47 | 0        | 1 | 6077  | 150211-Fr_I_Helo-red-alk-tryp-001.raw | 1 | 1 | AAC25688.1:O77463.1:AAC25689.1            | Carbamidomethylation; Aminoethylcysteine                                         | C3:Carbamidomethylation:1000.00;C11:Carbamidomethylati on:1000.00;C15:Carbamidome thylation:1000.00;T16:Aminoethylcysteine:0.00 |
| <b>IYEYSR</b>                                              | 16,25 | 829,397  | 6  | 0    | 415,7058 | 4,02  | 0        | 1 | 959   | 150211-Fr_I_Helo-red-alk-tryp-001.raw | 1 | 1 |                                           |                                                                                  |                                                                                                                                 |
| <b>DYLLYC(+57.02)DFS(+58.03)DKDPK</b>                      | 16,21 | 1835,816 | 14 | -2,1 | 612,9447 | 34,82 | 0        | 1 | 11773 | 150211-Fr_I_Helo-red-alk-tryp-001.raw | 2 | 2 | JAW07031.1:JAW06995.1:JAG85161.1          | Carbamidomethylation; 2 3-dihydro-2 2-dimethyl-7-benzofuranol N-methyl carbamate | C6:Carbamidomethylation:1000.00;S9:2 3-dihydro-2 2-dimethyl-7-benzofuranol N-methyl carbamate:1000.00                           |
| <b>QPEAAAGVLEYAMK</b>                                      | 16,2  | 1476,728 | 14 | -0,5 | 739,371  | 29,72 | 0        | 1 | 9983  | 150211-Fr_I_Helo-red-alk-tryp-001.raw | 1 | 1 |                                           |                                                                                  |                                                                                                                                 |
| <b>TTMDGQLIK</b>                                           | 16,18 | 1005,517 | 9  | -0,3 | 503,7654 | 6,09  | 0        | 1 | 1559  | 150211-Fr_I_Helo-red-alk-tryp-001.raw | 1 | 1 |                                           |                                                                                  |                                                                                                                                 |
| <b>AEIDFSGIPE(+37.95)D</b>                                 | 16,18 | 1229,476 | 11 | 2,2  | 615,7468 | 33,36 | 0        | 1 | 11244 | 150211-Fr_I_Helo-red-alk-tryp-001.raw | 1 | 1 | JAW06987.1:JAW07038.1:JAW06992.1:P84190.1 | Replacement of 2 protons by calcium                                              | E10:Replacement of 2 protons by calcium:0.00                                                                                    |
| <b>E(+42.01)ALAPEPAPK(+14.02)PAPEPAPEPAPEP</b>             | 16,18 | 2357,179 | 23 | 2,3  | 786,7354 | 36,05 | 0        | 1 | 12213 | 150211-Fr_I_Helo-red-alk-tryp-001.raw | 1 | 1 | POC8W6.1                                  | Acetylation (Protein N-term); Methylation(KR)                                    | E1:Acetylation (Protein N-term):1000.00;K10:Methylatio n(KR):1000.00                                                            |
| <b>LIINVNK</b>                                             | 16,17 | 812,512  | 7  | 0    | 407,2633 | 29,18 | 0        | 1 | 9807  | 150211-Fr_I_Helo-red-alk-tryp-001.raw | 3 | 3 |                                           |                                                                                  |                                                                                                                                 |
| <b>AVGITSM(+15.99)SPEDILK</b>                              | 16,17 | 1475,754 | 14 | -1,2 | 738,8835 | 43,56 | 0        | 1 | 14948 | 150211-Fr_I_Helo-red-alk-tryp-001.raw | 1 | 1 |                                           | Oxidation (M)                                                                    | M7:Oxidation (M):1000.00                                                                                                        |
| <b>APEPAPEPAPEAAPEP</b>                                    | 16,17 | 1568,736 | 16 | -3,1 | 785,3727 | 13,97 | 0        | 1 | 4401  | 150211-Fr_I_Helo-red-alk-tryp-001.raw | 1 | 1 | POC8W6.1                                  |                                                                                  |                                                                                                                                 |
| <b>AEIDFSGIPEDIK(+14.02)EIK</b>                            | 16,17 | 1930,03  | 17 | -0,5 | 644,3502 | 48,48 | 0        | 1 | 16671 | 150211-Fr_I_Helo-red-alk-tryp-001.raw | 1 | 1 | P84190.1                                  | Methylation(KR)                                                                  | K14:Methylation(KR):9.42                                                                                                        |
| <b>PEAAPEAAAAPE(+43.04)AAPE</b>                            | 16,14 | 1630,784 | 17 | -1,8 | 816,3977 | 32,64 | 0        | 1 | 10984 | 150211-Fr_I_Helo-red-alk-tryp-001.raw | 1 | 1 | POC8W6.1                                  | Carboxyl modification with ethanolamine                                          | E13:Carboxyl modification with ethanolamine:14.77                                                                               |
| <b>TVKFRALNEEIELK</b>                                      | 16,13 | 1688,946 | 14 | -1,8 | 563,9883 | 35,69 | 0        | 1 | 12085 | 150211-Fr_I_Helo-red-alk-tryp-001.raw | 1 | 1 |                                           |                                                                                  |                                                                                                                                 |
| <b>LLNSFDEM(+15.99)SEKLN</b>                               | 16,05 | 1568,776 | 13 | -1,6 | 785,3938 | 13,22 | 0        | 1 | 4131  | 150211-Fr_I_Helo-red-alk-tryp-001.raw | 1 | 1 |                                           | Oxidation (M)                                                                    | M8:Oxidation (M):1000.00                                                                                                        |
| <b>EPAPEPAPEPAPE(+541.06)AAPAAPE</b>                       | 16,03 | 2607,009 | 21 | -0,5 | 870,0098 | 34,78 | 0        | 1 | 11760 | 150211-Fr_I_Helo-red-alk-tryp-001.raw | 1 | 1 | JAW07022.1:P86821.1                       | ADP Ribose addition                                                              | E13:ADP Ribose addition:0.00                                                                                                    |
| <b>PEAAPEAAPEAAAAAPER(-42.02)</b>                          | 16,02 | 1701,821 | 18 | -1,3 | 851,9166 | 32,61 | 0        | 1 | 10974 | 150211-Fr_I_Helo-red-alk-tryp-001.raw | 1 | 1 | JAW07022.1                                | Ornithine from Arginine                                                          | R18:Ornithine from Arginine:1000.00                                                                                             |

J Venom Anim Toxins incl Trop Dis, 2019

|                                                             |       |          |    |      |          |       |   |   |       |                                       |   |   |                                                    |                                                            |                                                                                                                                |
|-------------------------------------------------------------|-------|----------|----|------|----------|-------|---|---|-------|---------------------------------------|---|---|----------------------------------------------------|------------------------------------------------------------|--------------------------------------------------------------------------------------------------------------------------------|
| PEPAAAAAPER(-43.05)R                                        | 15,97 | 1120,551 | 11 | -2   | 561,2818 | 11,94 | 0 | 1 | 3671  | 150211-Fr_I_Helo-red-alk-tryp-001.raw | 1 | 1 | JAW07022.1                                         | Arginine oxidation to glutamic semialdehyde                | R10:Arginine oxidation to glutamic semialdehyde:0.00                                                                           |
| LSMNAIDMIEDLLQK                                             | 15,84 | 1732,874 | 15 | 2,1  | 578,6331 | 40,61 | 0 | 1 | 13882 | 150211-Fr_I_Helo-red-alk-tryp-001.raw | 1 | 1 |                                                    |                                                            |                                                                                                                                |
| ILINNVK                                                     | 15,77 | 812,512  | 7  | -0,3 | 407,2631 | 28,99 | 0 | 1 | 9744  | 150211-Fr_I_Helo-red-alk-tryp-001.raw | 5 | 5 |                                                    |                                                            |                                                                                                                                |
| LLLNNVK                                                     | 15,77 | 812,512  | 7  | -0,3 | 407,2631 | 28,99 | 0 | 1 | 9744  | 150211-Fr_I_Helo-red-alk-tryp-001.raw | 5 | 5 |                                                    |                                                            |                                                                                                                                |
| AVNFGGSSK                                                   | 15,77 | 865,4293 | 9  | 0    | 433,722  | 26,61 | 0 | 1 | 8974  | 150211-Fr_I_Helo-red-alk-tryp-001.raw | 2 | 2 |                                                    |                                                            |                                                                                                                                |
| T(+225.09)FC(+57.02)TPSTC(+57.02)K                          | 15,75 | 1325,557 | 9  | -0,5 | 663,7853 | 13,97 | 0 | 1 | 4399  | 150211-Fr_I_Helo-red-alk-tryp-001.raw | 1 | 1 | JAW07031.1:JAW06995.1:JAG85161.1                   | Iminobiotinylation; Carbamidomethylation                   | T1:Iminobiotinylation:58.11;C3:Carbamidomethylation:1000.00;C8:Carbamidomethylation:1000.00                                    |
| SVVNNLQYK                                                   | 15,71 | 1063,566 | 9  | -0,7 | 532,79   | 24,7  | 0 | 1 | 8356  | 150211-Fr_I_Helo-red-alk-tryp-001.raw | 1 | 1 |                                                    |                                                            |                                                                                                                                |
| PEAAPEAAAAAPER(-.98)                                        | 15,68 | 1530,79  | 15 | -5   | 766,3986 | 41,47 | 0 | 1 | 14195 | 150211-Fr_I_Helo-red-alk-tryp-001.raw | 1 | 1 | JAW07022.1                                         | Amidation                                                  | R15:Amidation:1000.00                                                                                                          |
| ADVDFGTIAD(+37.95)S                                         | 15,67 | 1147,435 | 11 | 2,1  | 574,7258 | 32,97 | 0 | 1 | 11101 | 150211-Fr_I_Helo-red-alk-tryp-001.raw | 1 | 1 | JAW07002.1:P86824.1                                | Replacement of 2 protons by calcium                        | D10:Replacement of 2 protons by calcium:12.28                                                                                  |
| PEPAAAAAPER(+380.15)RR                                      | 15,66 | 1699,853 | 12 | -1,5 | 850,9324 | 21,36 | 0 | 1 | 7168  | 150211-Fr_I_Helo-red-alk-tryp-001.raw | 1 | 1 | JAW07022.1                                         | Nucleophilic addition to cytopiloyne+H2O                   | R10:Nucleophilic addition to cytopiloyne+H2O:0.00                                                                              |
| C(sub T)QFGC(+57.02)PAYEGYC(+57.02)T(sub M)NHC(+57.02)QDIER | 15,63 | 2607,003 | 21 | 0,3  | 1304,509 | 15,22 | 0 | 1 | 4860  | 150211-Fr_I_Helo-red-alk-tryp-001.raw | 1 | 1 |                                                    | Carbamidomethylation                                       | C5:Carbamidomethylation:1000.00;C12:Carbamidomethylation:1000.00;C16:Carbamidomethylation:1000.00                              |
| EPAPEPAPE(+356.19)PAPE                                      | 15,62 | 1685,797 | 13 | 0    | 843,9058 | 14,51 | 0 | 1 | 4599  | 150211-Fr_I_Helo-red-alk-tryp-001.raw | 1 | 1 | JAW07022.1:P86821.1:POC8W6.1                       | Biotin polyethyleneoxide amine                             | E9:Biotin polyethyleneoxide amine:16.76                                                                                        |
| T(+601.21)GIADSIKK                                          | 15,6  | 1645,824 | 10 | -3,4 | 549,6135 | 36,23 | 0 | 1 | 12279 | 150211-Fr_I_Helo-red-alk-tryp-001.raw | 2 | 2 | JAW07002.1                                         | EDT-maleimide-PEO-biotin                                   | T1:EDT-maleimide-PEO-biotin:61.30                                                                                              |
| TVEPH(+616.18)ILK                                           | 15,6  | 1551,721 | 8  | -0,8 | 776,8673 | 45,97 | 0 | 1 | 15803 | 150211-Fr_I_Helo-red-alk-tryp-001.raw | 1 | 1 | JAW07042.1                                         | Heme                                                       | H5:Heme:1000.00                                                                                                                |
| ITC(+57.02)FLTAAGYC(+57.02)N(+.98)TEC(+57.02)TLK            | 15,56 | 2122,937 | 18 | -1,1 | 708,6522 | 68,32 | 0 | 1 | 23130 | 150211-Fr_I_Helo-red-alk-tryp-001.raw | 1 | 1 | AAC25688.1:O77463.1:AAC25689.1                     | Carbamidomethylation; Deamidation (NQ)                     | C3:Carbamidomethylation:1000.00;C11:Carbamidomethylation:1000.00;N12:Deamidation (NQ):1000.00;C15:Carbamidomethylation:1000.00 |
| LNDELIPK                                                    | 15,56 | 940,5229 | 8  | 0,5  | 471,269  | 13,8  | 0 | 1 | 4339  | 150211-Fr_I_Helo-red-alk-tryp-001.raw | 1 | 1 |                                                    |                                                            |                                                                                                                                |
| VGVQ(sub S)QDDS(sub T)DYNER                                 | 15,49 | 1523,649 | 13 | 0,9  | 762,8324 | 5,85  | 0 | 1 | 1474  | 150211-Fr_I_Helo-red-alk-tryp-001.raw | 1 | 1 |                                                    |                                                            |                                                                                                                                |
| DNLIPGPPAAFDPLISAMS(+58.03)K                                | 15,48 | 2325,18  | 22 | -2,6 | 776,0652 | 47,52 | 0 | 1 | 16344 | 150211-Fr_I_Helo-red-alk-tryp-001.raw | 1 | 1 | AIJ02109.2:P86392.3:V9Z9A3.1:AHE40589.1:AHE40588.1 | 2 3-dihydro-2 2-dimethyl-7-benzofuranol N-methyl carbamate | S21:2 3-dihydro-2 2-dimethyl-7-benzofuranol N-methyl carbamate:0.00                                                            |
| KEALAPEPAKPAPE(+21.97)PAPEAPEPEAAPEPA                       | 15,48 | 3284,609 | 33 | -2,1 | 1643,308 | 37,24 | 0 | 1 | 12656 | 150211-Fr_I_Helo-red-alk-tryp-001.raw | 1 | 1 | POC8W6.1                                           | Replacement of 2 protons by magnesium                      | E15:Replacement of 2 protons by magnesium:0.00                                                                                 |
| DEIKDNVK                                                    | 15,48 | 959,4923 | 8  | 0,1  | 480,7535 | 1,53  | 0 | 1 | 356   | 150211-Fr_I_Helo-red-alk-tryp-001.raw | 1 | 1 |                                                    |                                                            |                                                                                                                                |



J Venom Anim Toxins incl Trop Dis, 2019

|                                                                |       |          |    |      |          |       |          |   |       |                                       |   |   |                                                             |                                                        |                                                                                                                                             |
|----------------------------------------------------------------|-------|----------|----|------|----------|-------|----------|---|-------|---------------------------------------|---|---|-------------------------------------------------------------|--------------------------------------------------------|---------------------------------------------------------------------------------------------------------------------------------------------|
| <b>LTSKSE(+129.04)YAC(+57.02)PVIDK</b>                         | 15,45 | 1738,845 | 14 | -3,6 | 580,6201 | 30,3  | 0        | 1 | 10170 | 150211-Fr_I_Helo-red-alk-tryp-001.raw | 1 | 1 | Q0GY43.1:ABE98264.1                                         | Monoglutamyl; Carbamidomethylation                     | E6:Monoglutamyl:1000.00;C9:Carbamidomethylation:1000.00                                                                                     |
| <b>SEYAC(+57.02)PAIDKFC(+57.02)EDHC(+57.02)AAK(+175.04)K</b>   | 15,39 | 2574,077 | 20 | -3,6 | 859,0297 | 33,7  | 0        | 1 | 11368 | 150211-Fr_I_Helo-red-alk-tryp-001.raw | 1 | 1 | P86822.2:P0C8W4.2:AFP87551.1:Q0GY42.1:ABE98265.1:JAG85223.1 | Carbamidomethylation; Naphthalene-2 3-dicarboxaldehyde | C5:Carbamidomethylation:1000.00;C12:Carbamidomethylation:1000.00;C16:Carbamidomethylation:1000.00;K19:Naphthalene-2 3-dicarboxaldehyde:0.00 |
| <b>APEAAPEPAAAAPER(+453.21)</b>                                | 15,35 | 1899,923 | 15 | 2,9  | 950,9714 | 17,82 | 0        | 1 | 5830  | 150211-Fr_I_Helo-red-alk-tryp-001.raw | 1 | 1 | JAW07022.1                                                  | Puromycin                                              | R15:Puromycin:1000.00                                                                                                                       |
| <b>NIYEGPYPTLLIADPELIK</b>                                     | 15,31 | 2158,156 | 19 | 1,7  | 1080,087 | 49,7  | 0        | 1 | 17089 | 150211-Fr_I_Helo-red-alk-tryp-001.raw | 1 | 1 |                                                             |                                                        |                                                                                                                                             |
| <b>AEIDFSGIPEDIKQIKET(+122.01)NAKPPARF</b>                     | 15,3  | 3148,621 | 27 | -3,8 | 1575,312 | 38,9  | 5,35E+08 | 1 | 13261 | 150211-Fr_I_Helo-red-alk-tryp-001.raw | 1 | 1 | JAW06987.1:JAW07038.1:JAW06992.1                            | O-Isopropylphosphorylation                             | T19:O-Isopropylphosphorylation:61.26                                                                                                        |
| <b>AAPEPAPEAAPEPVAAAAPER</b>                                   | 15,27 | 2011,001 | 21 | -3,5 | 1006,504 | 14,43 | 0        | 1 | 4568  | 150211-Fr_I_Helo-red-alk-tryp-001.raw | 1 | 1 | JAG85215.1                                                  |                                                        |                                                                                                                                             |
| <b>LTSSEYAC(+57.02)PAIDK(+114.04)FC(+57.02)EDHC(+57.02)AAK</b> | 15,23 | 2815,189 | 23 | 3,8  | 939,4071 | 32,89 | 0        | 1 | 11073 | 150211-Fr_I_Helo-red-alk-tryp-001.raw | 1 | 1 | Q0GY42.1:ABE98265.1:JAG85223.1                              | Carbamidomethylation; Ubiquitin                        | C9:Carbamidomethylation:1000.00;K14:Ubiquitin:12.36;C16:Carbamidomethylation:1000.00;C20:Carbamidomethylation:1000.00                       |
| <b>PAPEPAPEAAPEAAPEAAAAPER(+132.02)R</b>                       | 15,21 | 2750,341 | 26 | 3,2  | 917,7906 | 37,99 | 0        | 1 | 12932 | 150211-Fr_I_Helo-red-alk-tryp-001.raw | 1 | 1 | JAW07022.1                                                  | Hydroxyphenylglyoxal arginine                          | R25:Hydroxyphenylglyoxal arginine:0.00                                                                                                      |
