# Supplementary material for: Proteome of fraction from Tityus serrulatus venom reveals new enzymes and toxins
Source: PubMed Central journal article supplement (PMC6483408; doi:10.1590/1678-9199-jvatitd-1482-18), 2019-04-18
Supplement: 1678-9199-jvatitd-25-e148218-s2.pdf [file 1678-9199-jvatitd-25-e148218-s2.pdf]

## Supplementary Material to “Proteome of fraction from *Tityus serrulatus* venom reveals new enzymes and toxins”

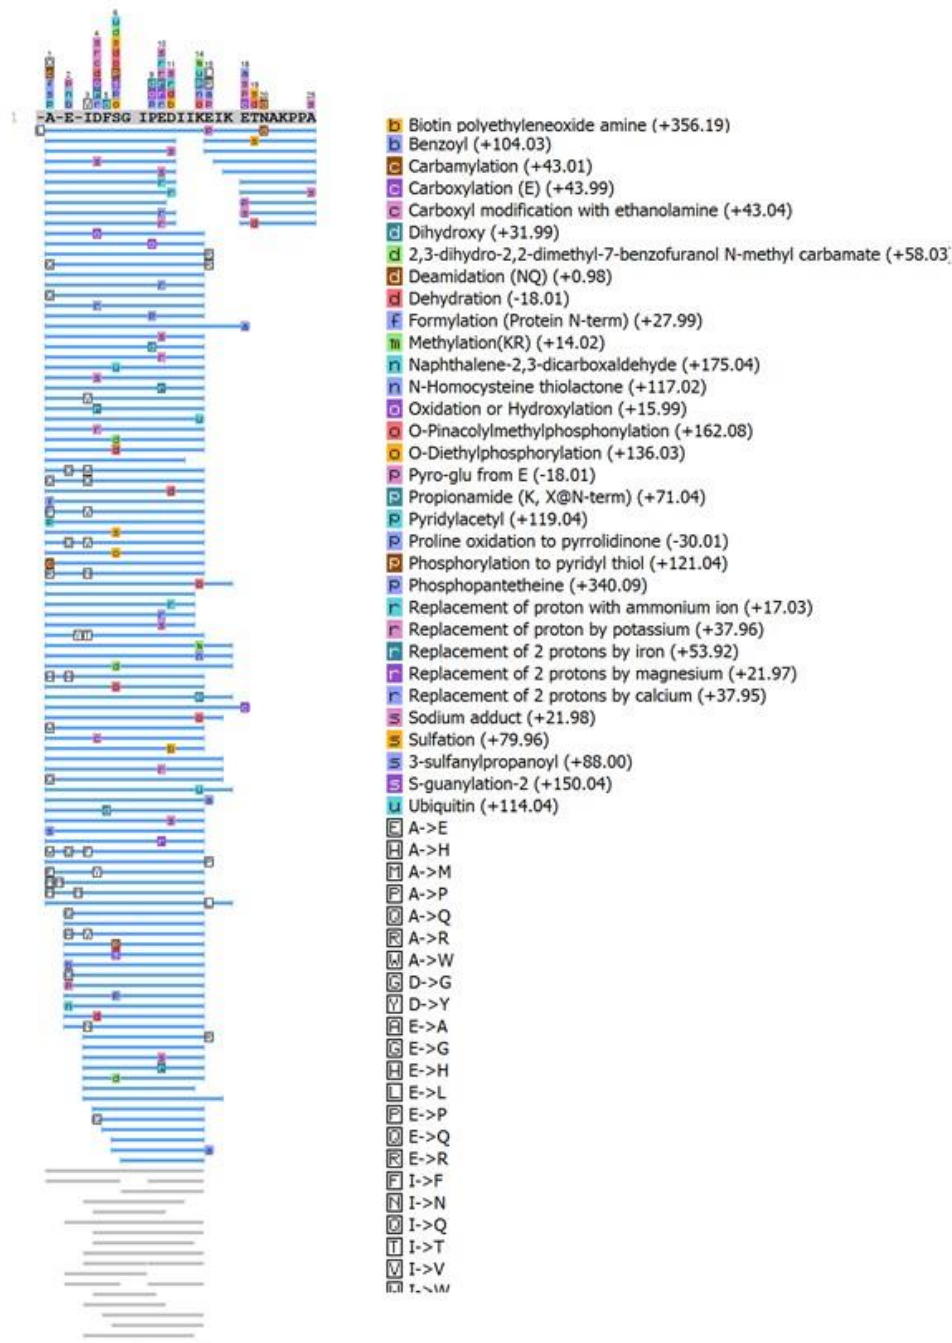

**Additional file 2** - Hypotensin-2 (P84190.1) found in the Fraction I, in which the *de novo* sequencing showed 210 *de novo* tags resulted from at least 22 amino acid residues mutations.
